# Supplementary material for: Tropomyosin 1-I/C coordinates kinesin-1 and dynein motors during oskar mRNA transport
Source: Springer Nature journal article supplement (doi:10.1038/s41594-024-01212-x), 2024-01-31
Supplement: MOESM1 [file 41594_2024_1212_MOESM1_ESM.pdf]

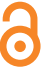

---

# Tropomyosin 1-I/C coordinates kinesin-1 and dynein motors during *oskar* mRNA transport

---

In the format provided by the authors and unedited

---

## Supplementary Information

### **Tropomyosin 1-I/C co-ordinates kinesin-1 and dynein motors during *oskar* mRNA transport**

Simone Heber<sup>1†</sup>, Mark A. McClintock<sup>2†</sup>, Bernd Simon<sup>3,4</sup>, Eve Mehtab<sup>1</sup>, Karine Lapouge<sup>5</sup>,  
Janosch Hennig<sup>3,6</sup>, Simon L. Bullock<sup>2\*</sup>, Anne Ephrussi<sup>1\*</sup>

1 Developmental Biology Unit, European Molecular Biology Laboratory, 69117 Heidelberg, Germany

2 Division of Cell Biology, MRC Laboratory of Molecular Biology, Cambridge CB2 0QH, United Kingdom

3 Structural and Computational Biology Unit, European Molecular Biology Laboratory, 69117 Heidelberg, Germany

4 Department of Molecular Biology and Biophysics, University of Connecticut Health Center, Farmington, CT, USA

5 Protein Expression and Purification Core Facility, European Molecular Biology Laboratory, 69117 Heidelberg, Germany

6 Biochemistry IV, Biophysical Chemistry, University of Bayreuth, 95447 Bayreuth, Germany

†These authors contributed equally to this work

\*Correspondence: sbullock@mrc-lmb.cam.ac.uk, anne.ephrussi@embl.org

## Supplementary Figures

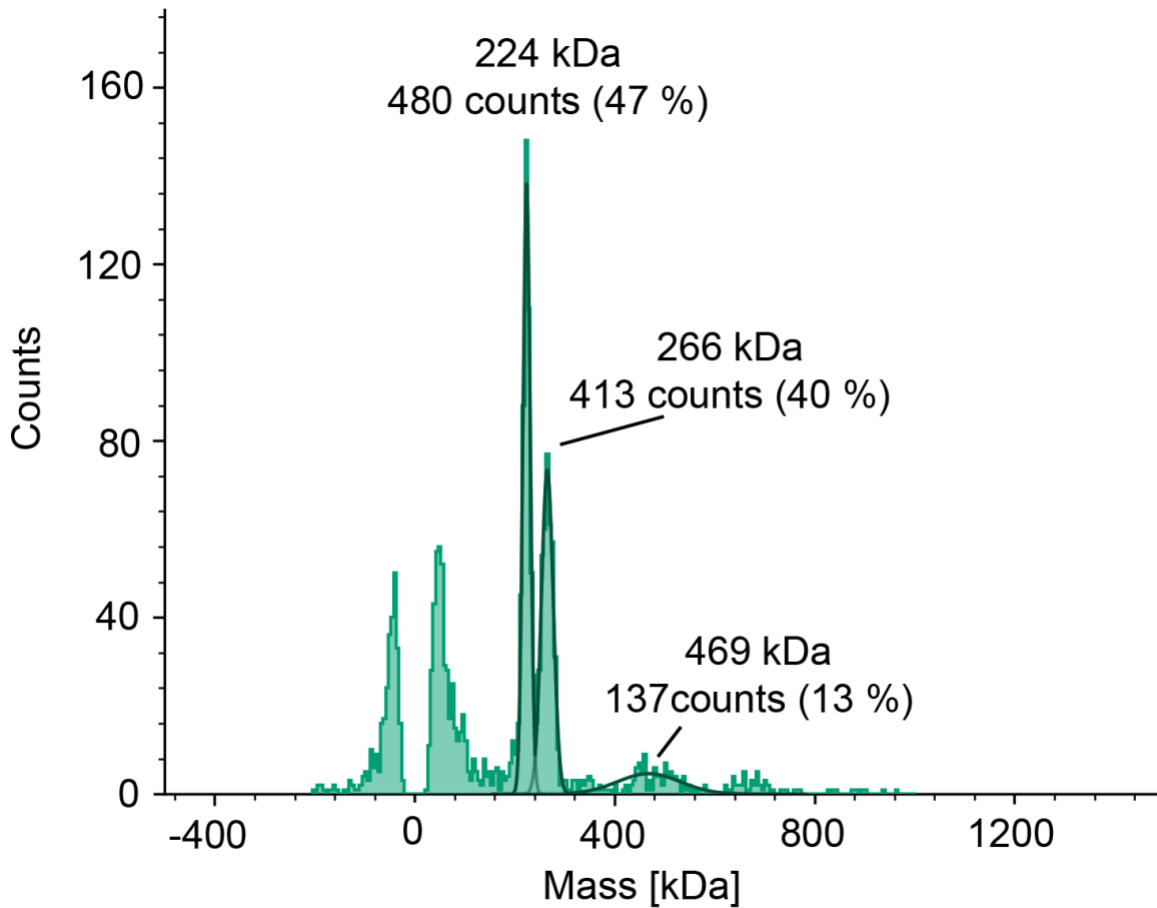

**Figure S1: Khc and Tm1 form a complex *in vitro*.** Mass photometry measurements of the Khc FL-Tm1 FL complex at 20 nM concentration. The sample comprises a mixture of 47% particles of 224 kDa, corresponding to the Khc dimer (theoretical MW = 221.2 kDa), 40% particles of 266 kDa, corresponding to a Khc dimer bound to a Tm1 monomer (theoretical MW = 269.2 kDa), and 13% of the particles represent larger species. This indicates that in solution, ~50% of Khc is bound to Tm1 at steady-state at concentrations below the  $K_D$ , confirming the 2:1 stoichiometry of the Khc-Tm1 complex<sup>1</sup>.

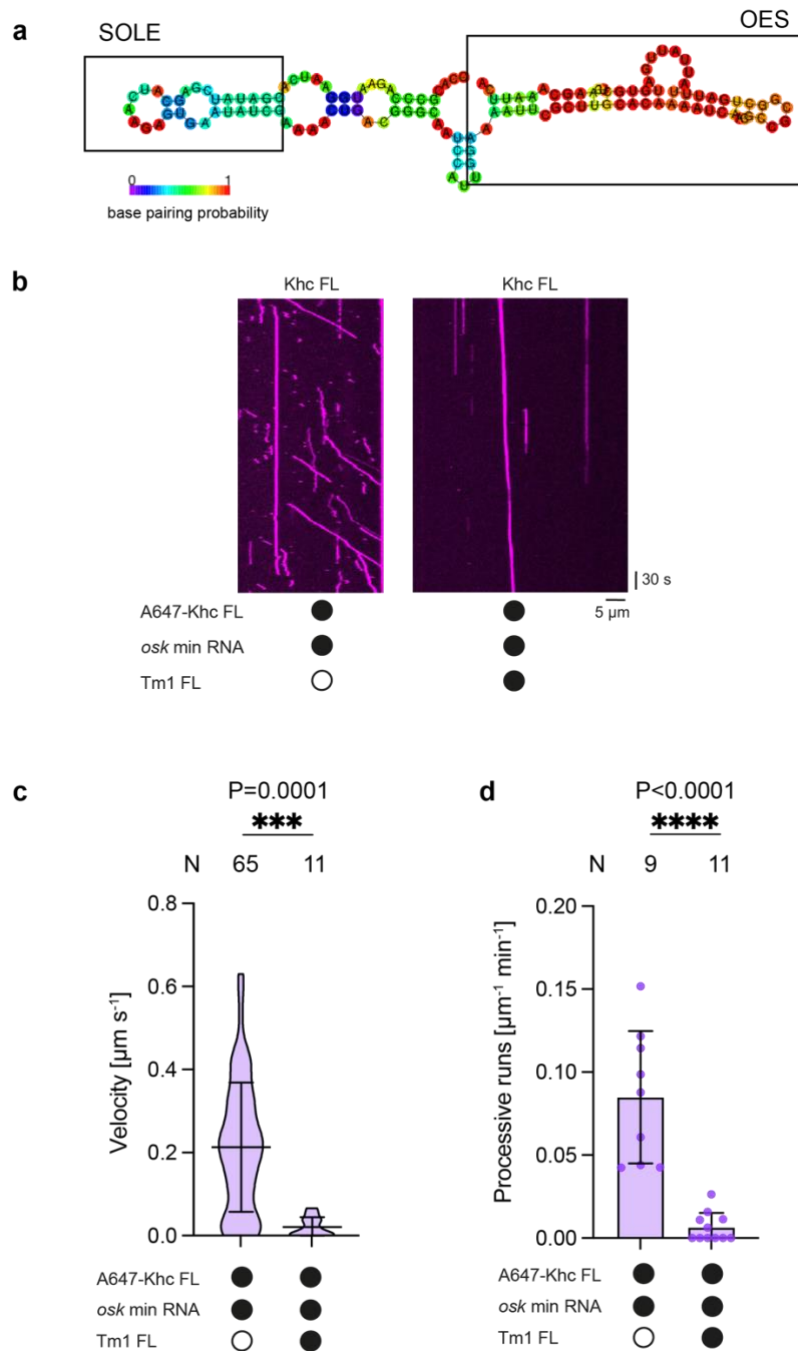

**Figure S2: The SOLE does not render Khc resistant to inhibition by Tm1.** **a** RNAfold<sup>2</sup> MFE prediction of *osk min* RNA containing both the OES and SOLE stem loops. The structures of these localization elements are predicted to be preserved in the *osk min* construct. **b** Kymographs showing the motile behavior of Khc FL in the presence or absence of Tm1 FL. Microtubule plus and minus ends are oriented toward the right and left of each kymograph, respectively. **c, d** Velocity of motile Khc FL (c) and frequency of processive Khc FL movements (d) in the presence or absence of Tm1 FL. Quantification is from one representative experiment of five in which strong inhibition of Khc motility by Tm1 in the presence of *osk min* was observed. For all plots, the mean  $\pm$  SD is shown and is derived from 11-65 individual complexes (c; N) or 9-11 microtubules (d; N) from 2-3 imaging chambers per condition. In all panels, black or white circles indicate the presence or absence of indicated components, respectively. Unlabeled *osk min* was included in all experiments. Statistical significance was determined by unpaired two-tailed t-tests with Welch's correction using N values (total number of individual complexes (c) or total number of microtubules (d)).

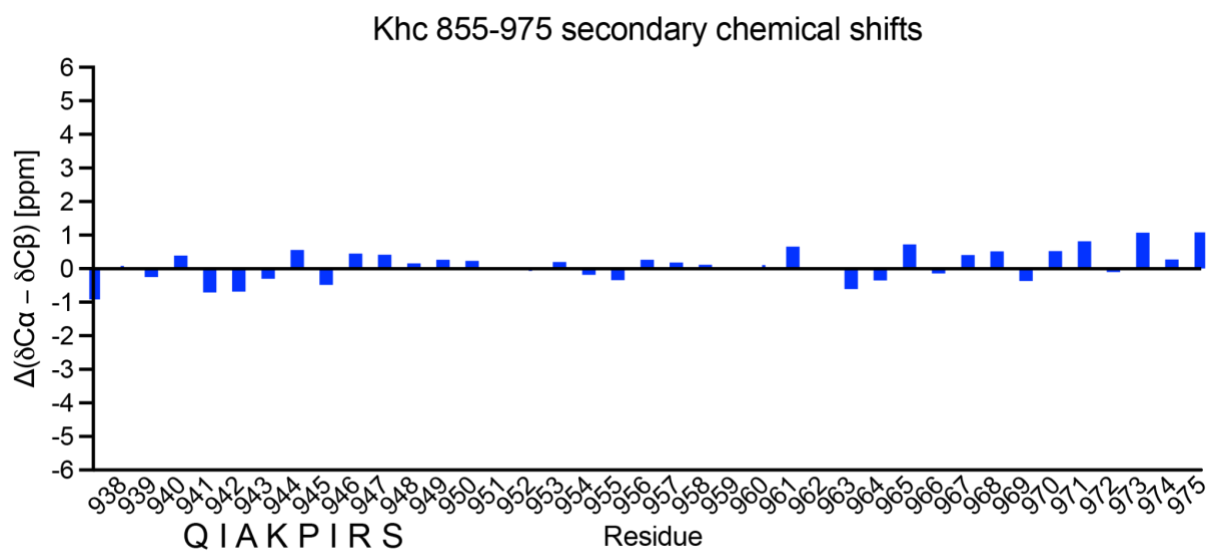

**Figure S3: Secondary chemical shifts of Khc 855-975.** Secondary structure is not detected in the part of the construct visible by NMR (even transient secondary structure elements should give values > 1).

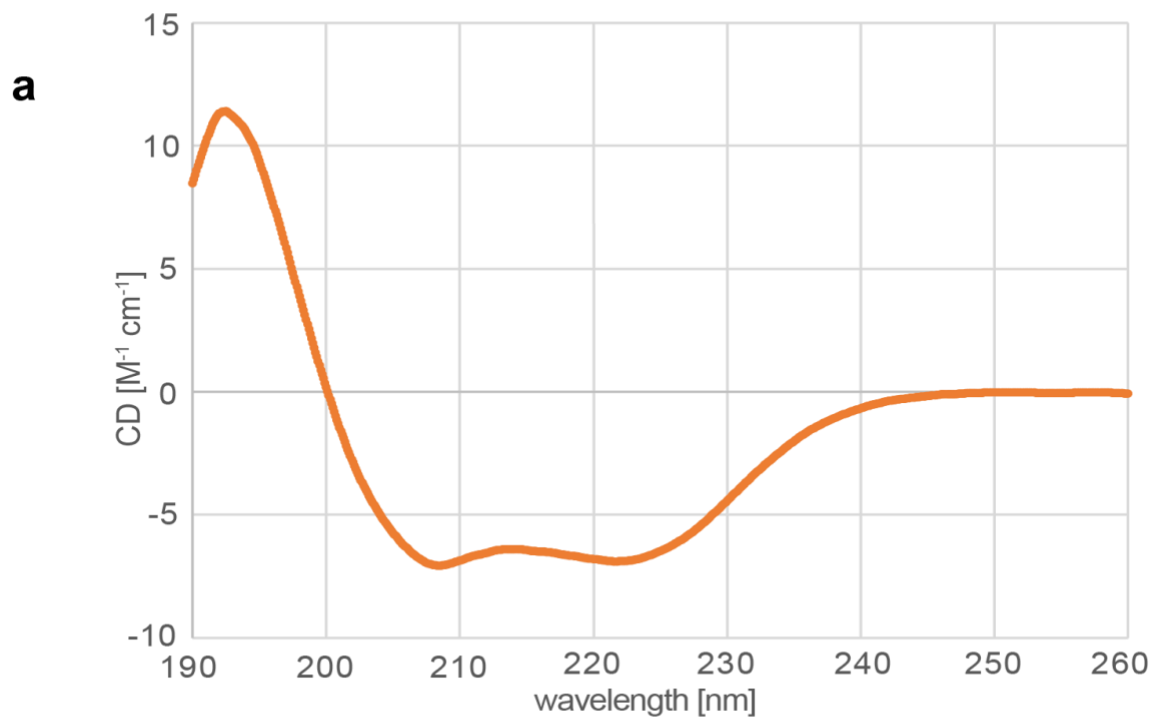

**b**

| % Helix | % Strand | % Disordered |
|---------|----------|--------------|
| 67.8    | 7.5      | 27.6         |

**Figure S4: CD spectrum of Khc 855-975.** **a** The CD spectrum of Khc 855-975 shows high  $\alpha$ -helical content with minima at 208 nm and 222 nm that have a ratio of 0.97, consistent with the presence of a coiled-coil structure within the protein<sup>3</sup>. **b** Secondary structure content of Khc 855-975 calculated according to the CDSSTR, Selcon3 and Contin-LL methods using the Dichroweb server.

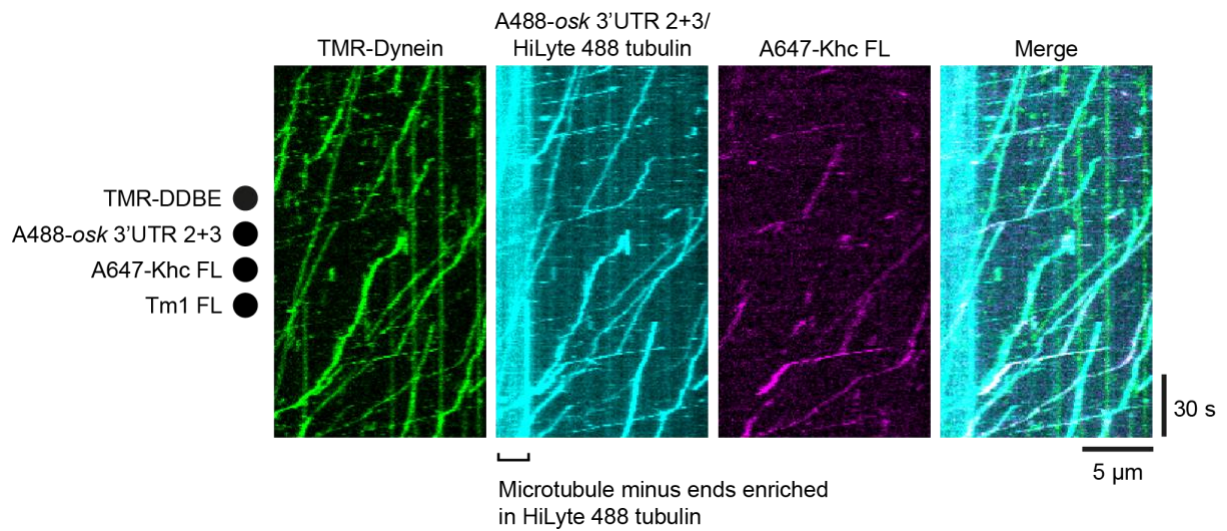

**Figure S5: Khc moves toward microtubule minus ends with DDBE and *osk* RNA.** Kymographs showing the Tm1 FL-induced co-translocation of dynein, *osk* 3'UTR 2+3 RNA, and Khc FL toward microtubule minus ends, which are labeled by enrichment of fluorescent (HiLyte 488) tubulin dimers. Microtubule plus and minus ends are oriented toward the right and left of each kymograph, respectively. Black circles indicate the presence of indicated components.

## Supplementary Tables

|                        | <b>MT binding events</b><br>[min <sup>-1</sup> μm <sup>-1</sup> ] | <b>Processive events</b><br>[min <sup>-1</sup> μm <sup>-1</sup> ] | <b>Fraction of processive events</b>                 | <b>Mean velocity</b><br>[μm s <sup>-1</sup> ]                |
|------------------------|-------------------------------------------------------------------|-------------------------------------------------------------------|------------------------------------------------------|--------------------------------------------------------------|
| <b>Khc FL</b>          | 0.30 ± 0.26<br>(N=59 MTs, 5 independent experiments)              | 0.24 ± 0.18 (N=59 MTs, 5 independent experiments)                 | 0.77 ± 0.12<br>(N=59 MTs, 5 independent experiments) | 0.37 ± 0.28<br>(N=748 complexes, 5 independent experiments)  |
| <b>Khc FL + Tm1 FL</b> | 0.19 ± 0.16<br>(N=38 MTs, 5 independent experiments)              | 0.10 ± 0.16 (N=38 MTs, 5 independent experiments)                 | 0.45 ± 0.29<br>(N=38 MTs, 5 independent experiments) | 0.13 ± 0.15<br>(N=205 complexes, 5 independent experiments)  |
| <b>Khc910</b>          | 0.59 ± 0.23<br>(N=16 MTs, 2 independent experiments)              | 0.59 ± 0.23<br>(N=16 MTs, 2 independent experiments)              | 0.97 ± 0.01<br>(N=16 MTs, 2 independent experiments) | 0.55 ± 0.22<br>(N=755 complexes, 2 independent experiments)  |
| <b>+ Tm1 FL</b>        | 0.68 ± 0.19<br>(N=21 MTs, 2 independent experiments)              | 0.68 ± 0.19<br>(N=21 MTs, 2 independent experiments)              | 0.98 ± 0.02<br>(N=21 MTs, 2 independent experiments) | 0.53 ± 0.24<br>(N=2185 complexes, 2 independent experiments) |
| <b>Khc940</b>          | 1.21 ± 0.57<br>(N=28 MTs, 3 independent experiments)              | 1.19 ± 0.55<br>(N=28 MTs, 3 independent experiments)              | 0.98 ± 0.02<br>(N=28 MTs, 3 independent experiments) | 0.47 ± 0.20<br>(N=1802 complexes, 3 independent experiments) |
| <b>+ Tm1 FL</b>        | 0.63 ± 0.34<br>(N=26 MTs, 3 independent experiments)              | 0.39 ± 0.32<br>(N=26 MTs, 3 independent experiments)              | 0.61 ± 0.22<br>(N=26 MTs, 3 independent experiments) | 0.12 ± 0.10<br>(N=662 complexes, 3 independent experiments)  |
| <b>KhcΔAMB</b>         | 0.12 ± 0.11<br>(N=36 MTs, 3 independent experiments)              | 0.03 ± 0.02<br>(N=36 MTs, 3 independent experiments)              | 0.61 ± 0.30<br>(N=36 MTs, 3 independent experiments) | 0.52 ± 0.36<br>(N=162 complexes, 3 independent experiments)  |
| <b>+ Tm1 FL</b>        | 0.13 ± 0.07<br>(N=53 MTs, 3 independent experiments)              | 0.09 ± 0.05<br>(N=53 MTs, 3 independent experiments)              | 0.82 ± 0.17<br>(N=53 MTs, 3 independent experiments) | 0.58 ± 0.25<br>(N=811 complexes, 3 independent experiments)  |

**Table S1:** Motility parameters of Khc FL, Khc910, Khc940 and KhcΔAMB in the presence of *osk* 3'UTR ± Tm1 FL (Related to Figures 1, 2, Extended Data Figures 1-3). Mean ± SD are shown.

|                    | <b>MT binding events</b><br>[min <sup>-1</sup> μm <sup>-1</sup> ] | <b>Processive events</b><br>[min <sup>-1</sup> μm <sup>-1</sup> ] | <b>Fraction of processive events</b>                             | <b>Mean velocity</b><br>[μm s <sup>-1</sup> ]                  |
|--------------------|-------------------------------------------------------------------|-------------------------------------------------------------------|------------------------------------------------------------------|----------------------------------------------------------------|
| <b>Khc FL</b>      | 0.23 ± 0.08<br>(N=25 microtubules,<br>2 independent experiments)  | 0.16 ± 0.06<br>(N=25 microtubules,<br>2 independent experiments)  | 0.72 ± 0.28<br>(N=25 microtubules,<br>2 independent experiments) | 0.33 ± 0.24<br>(N=398 complexes,<br>2 independent experiments) |
| <b>+ Tm1 1-335</b> | 0.13 ± 0.03<br>(N=34 microtubules,<br>2 independent experiments)  | 0.06 ± 0.04<br>(N=34 microtubules,<br>2 independent experiments)  | 0.35 ± 0.19<br>(N=34 microtubules,<br>2 independent experiments) | 0.15 ± 0.17<br>(N=341 complexes,<br>2 independent experiments) |

**Table S2:** Motility parameters of Khc FL in the presence of *osk* 3'UTR ± Tm1 1-335 (Related to Figure 3). Mean ± SD are shown.

|                                                           | Total dynein binding frequency [ $\mu\text{m}^{-1} \text{min}^{-1}$ ]            | Processive dynein frequency [ $\mu\text{m}^{-1} \text{min}^{-1}$ ]               | Processive dynein fraction                                                       | Mean dynein velocity [ $\mu\text{m} \text{s}^{-1}$ ]                                     | Dynein run length [ $\mu\text{m}$ ]                                                   |
|-----------------------------------------------------------|----------------------------------------------------------------------------------|----------------------------------------------------------------------------------|----------------------------------------------------------------------------------|------------------------------------------------------------------------------------------|---------------------------------------------------------------------------------------|
| <b>DDBE-<i>osk</i> 3'UTR 2+3 -Tm1 FL</b>                  | 1.16 $\pm$ 0.20<br>N=20 microtubules (2152 complexes, 2 independent experiments) | 0.67 $\pm$ 0.14<br>N=20 microtubules (1277 complexes, 2 independent experiments) | 0.58 $\pm$ 0.07<br>N=20 microtubules (2152 complexes, 2 independent experiments) | 0.138 (median)<br>0.071-0.467 (IQ range)<br>N=1277 complexes (2 independent experiments) | 2.87 (median)<br>1.58-5.64 (IQ range)<br>N=1277 complexes (2 independent experiments) |
| <b>DDBE-<i>osk</i> 3'UTR 2+3 +Tm1 FL</b>                  | 1.27 $\pm$ 0.24<br>N=20 microtubules (2207 complexes, 2 independent experiments) | 0.75 $\pm$ 0.19<br>N=20 microtubules (1295 complexes, 2 independent experiments) | 0.58 $\pm$ 0.06<br>N=20 microtubules (2207 complexes, 2 independent experiments) | 0.162 (median)<br>0.069-0.502 (IQ range)<br>N=1295 complexes (2 independent experiments) | 3.01 (median)<br>1.61-5.71 (IQ range)<br>N=1295 complexes (2 independent experiments) |
| <b>DDBE-<i>osk</i> 3'UTR 2+3 +Tm1 FL (Tm1-bound only)</b> | N/A                                                                              | N/A                                                                              | N/A                                                                              | 0.166 (median)<br>0.083-0.422 (IQ range)<br>N=211 complexes (2 independent experiments)  | N/A                                                                                   |

**Table S3:** Motility parameters of dynein (representing DDBE-*osk* 3'UTR 2+3) in presence or absence of Tm1 FL (Related to Extended Data Figure 7). Mean  $\pm$  SD are shown unless otherwise indicated.

|                                                  | Frequency of Khc transport events toward plus ends [ $\mu\text{m}^{-1} \text{min}^{-1}$ ] | Frequency of Khc transport events toward minus ends [ $\mu\text{m}^{-1} \text{min}^{-1}$ ] | Fraction of Khc transport events toward plus ends                                 | Fraction of Khc transport events toward minus ends                                | Mean Khc-bound dynein velocity [ $\mu\text{m} \text{s}^{-1}$ ]                              | Distance traveled by Khc toward minus ends [ $\mu\text{m}$ ]                             |
|--------------------------------------------------|-------------------------------------------------------------------------------------------|--------------------------------------------------------------------------------------------|-----------------------------------------------------------------------------------|-----------------------------------------------------------------------------------|---------------------------------------------------------------------------------------------|------------------------------------------------------------------------------------------|
| <b>DDBE-<i>osk</i> 3'UTR 2+3 +Khc FL -Tm1 FL</b> | 0.005 ± 0.008<br>N=66<br>microtubules (40 complexes, 3 independent experiments)           | 0.019 ± 0.018<br>N=66<br>microtubules (138 complexes, 3 independent experiments)           | 0.198 ± 0.230<br>N=53<br>microtubules (178 complexes, 3 independent experiments)  | 0.802 ± 0.230<br>N=53<br>microtubules (178 complexes, 3 independent experiments)  | 0.126 (median)<br>0.066-0.242 (IQ range)<br>N=158<br>complexes (3 independent experiments)  | 1.97 (median)<br>1.21-3.79 (IQ range)<br>N=158<br>complexes (3 independent experiments)  |
| <b>DDBE-<i>osk</i> 3'UTR 2+3 +Khc FL +Tm1 FL</b> | 0.007 ± 0.013<br>N=60<br>microtubules (35 complexes, 3 independent experiments)           | 0.194 ± 0.072<br>N=60<br>microtubules (1167 complexes, 3 independent experiments)          | 0.031 ± 0.055<br>N=60<br>microtubules (1202 complexes, 3 independent experiments) | 0.969 ± 0.055<br>N=60<br>microtubules (1202 complexes, 3 independent experiments) | 0.220 (median)<br>0.097-0.463 (IQ range)<br>N=1259<br>complexes (3 independent experiments) | 3.15 (median)<br>1.86-5.99 (IQ range)<br>N=1259<br>complexes (3 independent experiments) |
| <b>DDBE-<i>osk</i> 3'UTR 2+3 +Khc940 -Tm1 FL</b> | 0.144 ± 0.073<br>N=86<br>microtubules (1219 complexes, 3 independent experiments)         | 0.050 ± 0.034<br>N=86<br>microtubules (469 complexes, 3 independent experiments)           | 0.731 ± 0.163<br>N=86<br>microtubules (1688 complexes, 3 independent experiments) | 0.269 ± 0.163<br>N=86<br>microtubules (1688 complexes, 3 independent experiments) | 0.070 (median)<br>0.036-0.166 (IQ range)<br>N=469<br>complexes (3 independent experiments)  | 2.36 (median)<br>1.37-4.62 (IQ range)<br>N=469<br>complexes (3 independent experiments)  |
| <b>DDBE-<i>osk</i> 3'UTR 2+3 +Khc940 +Tm1 FL</b> | 0.100 ± 0.065<br>N=88<br>microtubules (719 complexes, 3 independent experiments)          | 0.138 ± 0.073<br>N=88<br>microtubules (1076 complexes, 3 independent experiments)          | 0.417 ± 0.174<br>N=88<br>microtubules (1795 complexes, 3 independent experiments) | 0.583 ± 0.174<br>N=88<br>microtubules (1795 complexes, 3 independent experiments) | 0.078 (median)<br>0.037-0.169 (IQ range)<br>N=1076<br>complexes (3 independent experiments) | 2.47 (median)<br>1.58-4.41 (IQ range)<br>N=1076<br>complexes (3 independent experiments) |

**Table S4:** Motility parameters of dynein (representing DDBE-*osk* 3'UTR 2+3) and Khc FL or Khc940 in presence or absence of Tm1 FL (Related to Figure 6 and Extended Data Figure 8). Mean ± SD are shown unless otherwise indicated.

### SAXS sample details

---

|                                                         |                                                                       |                                                                                                                 |
|---------------------------------------------------------|-----------------------------------------------------------------------|-----------------------------------------------------------------------------------------------------------------|
| Sample                                                  | Khc                                                                   | Khc-Tm1                                                                                                         |
| Organism                                                | <i>Drosophila melanogaster</i>                                        | <i>Drosophila melanogaster</i>                                                                                  |
| Source                                                  | Sf21 insect cells                                                     | Sf21 insect cells                                                                                               |
| Description                                             | Kinesin heavy chain dimer (Uniprot: P17210 (1-975))                   | Complex of Kinesin heavy chain (Uniprot: P17210 (1-975)) and Tropomyosin1 isoform I/C (Uniprot: Q95TA3 (1-441)) |
| Molecular mass <i>M</i> from chemical composition (kDa) | 221                                                                   | 269 (2:1 complex stoichiometry)                                                                                 |
| Concentration (range/values) measured and method        | 0.5 mg mL <sup>-1</sup>                                               | 0.5 mg mL <sup>-1</sup>                                                                                         |
| Solvent composition                                     | 25 mM HEPES/KOH pH 7.3, 150 mM KCl, 1 mM MgCl <sub>2</sub> , 2 mM DTT | 25 mM HEPES/KOH pH 7.3, 150 mM KCl, 1 mM MgCl <sub>2</sub> , 2 mM DTT                                           |

---

### SAXS data collection parameters

---

Source, instrument and description or reference BM29 ESRF Grenoble with Pilatus2M

Wavelength (Å) 0.9919

|                                            |                                            |
|--------------------------------------------|--------------------------------------------|
| sample-to-detector distance (m)            | 2.813                                      |
| $q$ -measurement range (nm <sup>-1</sup> ) | 0.043 – 5.179                              |
| Method for monitoring radiation damage     | frame-by-frame comparison                  |
| Exposure time (s), number of exposures     | 1.0 x 10                                   |
| Sample configuration                       | sample changer with flow through capillary |
| Sample temperature (°C)                    | 20                                         |

---

**Software employed for SAXS data reduction, analysis and interpretation**

---

|                                                  |               |
|--------------------------------------------------|---------------|
| SAXS data reduction to sample–solvent scattering | ATSAS 2.8.4-1 |
| Atomic structure modeling                        | CNS-1.2       |

---

**Atomistic modeling**

|                        |              |       |
|------------------------|--------------|-------|
| Method                 | Crysol 2.8.3 |       |
| $q$ -range for fitting | 0.043-5.00   |       |
| $\chi^2$ value         | 3.071        | 1.684 |
| predicted $R_g$        | 94.88        | 112.3 |

**Table S5:** Reporting table for SAXS data acquisition, showing sample details, data analysis, model fitting and software used.

## Plasmids

| CONSTRUCTS                               | RELEVANT INFORMATION                         | SOURCE     |
|------------------------------------------|----------------------------------------------|------------|
| pFastBacDual-HisSUMO-SNAP-3C-Khc         | Amp <sup>r</sup> , p10/Polyhedrin promoter   | This study |
| pFastBacDual-HisSUMO-SNAP-3C-Khc910      | Amp <sup>r</sup> , p10/Polyhedrin promoter   | This study |
| pFastBacDual-HisSUMO-SNAP-3C-Khc940      | Amp <sup>r</sup> , p10/Polyhedrin promoter   | This study |
| pFastBacDual-HisSUMO-SNAP-3C-Khc<br>ΔAMB | Amp <sup>r</sup> , p10/Polyhedrin promoter   | This study |
| pFastBacDual-HisSUMO-SNAP-3C-Khc-Tm1     | Amp <sup>r</sup> , p10/Polyhedrin promoter   | This study |
| pGEX6.1-Khc 855-975                      | Amp <sup>r</sup> , tac promoter              | This study |
| pGEX6.1-Khc 1-365                        | Amp <sup>r</sup> , tac promoter              | This study |
| pETM11-His6-SUMO-SNAP-Tm1-FL             | Kan <sup>r</sup> , T7 promoter, lac operator | This study |
| pETM11-His6-SNAP-SUMO-Tm1 1-335          | Kan <sup>r</sup> , T7 promoter, lac operator | This study |

|                                                                                                                                            |                                              |        |
|--------------------------------------------------------------------------------------------------------------------------------------------|----------------------------------------------|--------|
| pETM11-His6-SUMO-Tm1-FL                                                                                                                    | Kan <sup>r</sup> , T7 promoter, lac operator | Ref. 1 |
| pETM11-His6-SUMO-Tm1 1-335                                                                                                                 | Kan <sup>r</sup> , T7 promoter, lac operator | Ref. 1 |
| pDyn1 (pAceBac1-ZZ-TEV-SNAPf-Dynein heavy chain - DYNC1H1)                                                                                 | Gen <sup>r</sup> , Polyhedrin promoter       | Ref. 4 |
| pDyn2 (pIDC-Dynein intermediate chain - DYNC1/2, Dynein light intermediate chain - DYNC1LI2, Tctex - DYNLT1, Robl - DYNLRB1, LC8 - DYNLL1) | Chlor <sup>r</sup> , Polyhedrin promoter     | Ref. 4 |
| pAceBac1-Egl-TEV-ZZ                                                                                                                        | Gen <sup>r</sup> , Polyhedrin promoter       | Ref. 5 |
| pIDC-BicD                                                                                                                                  | Chlor <sup>r</sup> , Polyhedrin promoter     | Ref. 5 |

**Table S6:** Plasmids used in this study.

## RNA sequences

### **osk 3'UTR**

GUUGGGUUCUUAUCAAGAUACAUAUAUGCAAUUUUGACUGGGCUGGCACC  
GGAACCGACAAAUAAGAACUUUUUGAUGAUUUUACGAUUUACGCUGAUGGA  
UCGCUGCUUUUACGGAAUUCGCUUAGUUUUAAUAUGUUUUUAUGUAGUAUG  
UUCUCUGUCUUUGUUUAUUUAUAUGUUCGUGCACUUGUCCUAGUCCAUUAAU  
GUAUAUUAAUUGUGUGUUUUGUGUUCUAUGUUAGAUUUAAACUUCUCAUUUU  
UCGCUGUCUGUGAUUUUGUUUUGCCAAUGCCAUUGAUUUUCUGCACACUUUU  
UGCUGCUAUCCCAAAAGCUGUGUAAAUAUCAAAUGCAAUAAGCGCAAGC  
AGCUGAAAACUUCUCUUCAAACUUUUCGCUUUUCCCAAACCAUUUUUGCUU  
UGAAAUCUGUUUUUACCAAUCAGAUUAAACUGCAAUAUGGAACUAAAUGCA  
AAUCAUUGCAAUGCUUAUAACUGUUUUUUGUUCUAUAUACUUUUUGUGUGGG

UCAAAAUUCGGCAUGCUCUGUAUCACACAACCCUGCCACUUGCCCUUAAAA  
GAAGGGCGCAGUGGGCGUGGUACGUUAUCAUAUGAGCCAUGCUGCAUUUUG  
GCCGUAUUGAAAAUGCACUGCUUUACUUGGAAAAUUCGCUUGCACAAAUCA  
ACGCCGCGGCUGAUUUUUUAUUGAUGUGCUCAGCAAUUCAGUGAAGCAU  
UUGCGCGAUUUUCGUCUUUCUGUUUCCGUUUGCAAAAAGUUUAUAAAAUGC  
UUACACUCUGCUGCAGACACGCCAACCGGAAGUGCGCACUAAGCGCUUGUUU  
GUAGCACAGUGUAGAAUUCUGGCGUAAUUUACAGCUCUACUUAAAGUCUUC  
UAGAUAGCUAUCUACUAAUUUAUAAACUUAUUUAUUGUCUUGAAUGUAUGUUA  
AUUGUAUGUAUUGAUGGUGAUCACGUUUUUUUUGUCCUAUAACAAGCUGCAA  
UGUAAAAUCCAAAAAUGAAAAAUAUUUUAAAAGGGAAAUCAUGAUUU  
UGUUUGCUCUAAGCUAUGUCAAAGUAACUGG

Total length: 1074 nt

#### **osk min**

CCACGCCAGAAUGGAAUCA**CGAUUAUCGAGCAUCAAGAGUGAAUAUCG**AAAA  
CUGACGGGCAAUCCAU**UGGAAAAUUCGCUUGCACAAAUCAACGCCGCGGCU**  
**GAUUUAUUUAUUGAUGUGCUCAGCAAUUCA**

Total length: 135 nt

**SOLE**

**OES**

#### **osk 3'UTR regions 2+3**

UGUUCUAUAUACUUUUGUGUGGGUCAAAAUUCGGCAUGCUCUGUAUCACAC  
AACCCUGCCACUUGCCCUUAAAAAGAAGGGCGCAGUGGGCGUGGUACGUUAUC  
AUAUGAGCCAUGCUGCAUUUUGGCCGUAUUGAAAAUGCACUGCUUUACUUGG  
AAAAUUCGCUUGCACAAAUCAACGCCGCGGCUGAUUUUAUUUAUUGAUGUGCU  
CAAGCAAUUCAGUGAAGCAUUUGCGCGAUUUUCGUCUUUCUGUUUCCGUU  
UGCAAAAAGUUUAUAAAAUGCUUACACUCUGCUGCAGACACGCCAACCGGA  
AGUGCGCACUAAGCGCUUGUUUGUAGCACAGUGUAGAAUUCUGGCGUAAUU  
UACAGCUCUACUUAAAGUCUUCUAGAUAGCUAUCUACUAAUUUAUAAACUUAU  
UUUAUUGUCUUGAAUGUAUGUUAUUUGUAUGUAUUGAUGGUGAUCACGUUUUU  
UUUGUCCUAUAACAAGCUGCAAUGUAAAAUCCAAAAAUGAAAAAUAUA  
AUAAAAGG

Total length: 530 nt

## Supplement references

1. Dimitrova-Paternoga L, Jagtap PKA, Cyrklaff A, Vaishali, Lapouge K, Sehr P, et al. Molecular basis of mRNA transport by a kinesin-1-atypical tropomyosin complex. *Genes Dev.* 2021 Jul 1;35(13–14):976–91.
2. Gruber AR, Lorenz R, Bernhart SH, Neuböck R, Hofacker IL. The Vienna RNA websuite. *Nucleic Acids Res.* 2008 Jul 1;36(Web Server issue):W70-4.
3. Lau SY, Taneja AK, Hodges RS. Synthesis of a model protein of defined secondary and quaternary structure. Effect of chain length on the stabilization and formation of two-stranded alpha-helical coiled-coils. *J Biol Chem.* 1984 Nov 10;259(21):13253–61.
4. Schlager MA, Hoang HT, Urnavicius L, Bullock SL, Carter AP. In vitro reconstitution of a highly processive recombinant human dynein complex. *EMBO J.* 2014 Sep 1;33(17):1855–68.
5. McClintock MA, Dix CI, Johnson CM, McLaughlin SH, Maizels RJ, Hoang HT, et al. RNA-directed activation of cytoplasmic dynein-1 in reconstituted transport RNPs. *eLife* 7:e36312 (2018).
