# Supplementary material for: Tropomyosin 1-I/C coordinates kinesin-1 and dynein motors during oskar mRNA transport
Source: Nat Struct Mol Biol. 2024 Jan 31;31(3):476–88. doi: 10.1038/s41594-024-01212-x (PMC10948360; doi:10.1038/s41594-024-01212-x)
Supplement: Supplementary file 4 — Source data for Supplementary Fig. 2. [file 41594_2024_1212_MOESM4_ESM.xlsx]

## Sheet: Figure S2c
Processive velocities in µm s-1
Khc+osk min	Khc+osk min + Tm1
0.597078	0.0654907
0.309715	0.0523925
0.308426	0.0227291
0.216865	0.0105941
0.199671	0.0352494
0.432441	0.0402575
0.305632	0
0.629532	0
0.5283	0.0078974
0.341095	0.00057786
0.314659	0
0.0593209
0.364093
0.0255768
0.0156899
0.429862
0.146583
0.386875
0.245236
0.315733
0.321107
0.377848
0.0945696
0.415461
0.443832
0.23277
0.429862
0.396762
0.206978
0.204614
0.0571716
0.260229
0.233262
0.229603
0.333425
0.242508
0.255028
0.12501
0.183759
0.196279
0.0319749
0.19262
0.109408
0.16912
0.119039
0.0302413
0.0287003
0.151399
0.132522
0.251369
0.19262
0.0433394
0.102666
0.142346
0.0279298
0.00231144
0.00443025
0
0.00539335
0.00500811
0.242315
0.00115572
0.262155
0.19262
0.00500811

## Sheet: Figure S2d
Processive runs in µm-1 min-1
Khc+osk min	Khc+osk min + Tm1
0.0985301	0.0114145
0.114399	0.0110068
0.151716	0
0.0877107	0.0063154
0.0425417	0.015724
0.0440273	0
0.0424117	0.0262663
0.0608272	0
0.121654	0
	0
	0
