# Supplementary material for: Tropomyosin 1-I/C coordinates kinesin-1 and dynein motors during oskar mRNA transport
Source: Nat Struct Mol Biol. 2024 Jan 31;31(3):476–88. doi: 10.1038/s41594-024-01212-x (PMC10948360; doi:10.1038/s41594-024-01212-x)
Supplement: Supplementary file 7 — Numerical source data file with lists of motor protein movements used for statistical analysis. [file 41594_2024_1212_MOESM7_ESM.xlsx]

## Sheet: Figure 2a (and 1d)
Processive velocities in µm s-1								Per experiment averages of Processive velocities in µm s-1
Khc FL + osk 3'UTR	Khc FL + Tm1 FL+ osk 3'UTR	Khc940 + osk 3'UTR	Khc940 + Tm1 FL+ osk 3'UTR	Khc910 + osk 3'UTR	Khc910 + Tm1 FL+ osk 3'UTR	Khc ΔAMB + osk 3'UTR	Khc ΔAMB + osk 3'UTR + Tm1 FL	Khc FL + osk 3'UTR	Khc FL + Tm1 FL+ osk 3'UTR	Khc940 + osk 3'UTR	Khc940 + Tm1 FL+ osk 3'UTR	Khc910 + osk 3'UTR	Khc910 + Tm1 FL+ osk 3'UTR	Khc ΔAMB + osk 3'UTR	Khc ΔAMB + osk 3'UTR + Tm1 FL
0.130316	0.111732	0.623331	0.155833	0.498665	0.609279			0.230539	0.069488	0.546414	0.0816467	0.613948	0.549531
0.111283	0.0472173	0.522039	0.136354	0.467498	0.577756			0.454759	0.173605			0.629652	0.648654	0.559059	0.559351
0.218882	0.137756	0.666808	0.0889804	0.589982	0.646621			0.333357	0.276213
0.342444	0.00358415	0.0587489	0.184194	0.671795	1.08746									0.228182	0.568645
0.373142	0.0727739	0.595592	0.115784	0.475134	0.579858									0.466099	0.557845
0.29133	0.0308549	0.640628	0.13573	0.502405	0.693663			0.222245	0.0812635	0.388334	0.101603
0.245589	0.000623331	0.565984	0.0913179	0.735686	0.236825			0.4364	0.20906	0.584566	0.254609
0.046048	0.11329	0.660886	0.0656055	0.749555	0.487553
0.191406	0.00436331	0.512066	0.00592164	0.637511	0.697866
0.337685	0.0567231	0.446305	0.0853963	0.693923	0.623505
0.232389	0.00451915	0.701247	0.0709039	0.641407	0.662625
0.238375	0.0546973	0.718544	0.0501781	0.537623	0.574038
0.277362	0.0431656	0.719168	0.269123	0.658237	0.793566
0.209365	0.0903829	0.319145	0.356233	0.654497	0.722438
0.169917	0.0359973	0.694546	0.0571906	0.701247	0.473004
0.245436	0.00436331	0.685196	0.000934996	0.614604	0.713223
0.488416	0.0274265	0.755165	0.00233749	0.481367	0.512771
0.17621	0.0412957	0.481679	0.00124666	0.690183	0.555933
0.188643	0.00218166	0.502093	0.00592164	0.537311	0.568057
0.0155028	0.0261799	0.221906	0.0247774	0.685664	0.718881
0.024252	0.0199466	0.535753	0.287044	0.619746	0.656806
0.0908681	0.139782	0.645615	0.00903829	0.733348	0.527643
0.0136609	0.183727	0.81033	0.00451915	0.727271	0.547365
0.0409827	0.0860196	0.585152	0.0920971	0.734595	0.640155
0.0976218	0.0109083	0.520325	0.0110641	0.722129	0.54591
0.000153493	0.0941229	0.484016	0.0483081	0.668522	0.608147
0.00859563	0.148509	0.631434	0.0115316	0.532792	0.467022
0.508523	0.10207	0.467498	0.00576581	0.591385	0.335758
0.320034	0.0389582	0.149911	0.0426981	0.322729	0.75978
0.187415	0.00171416	0.311665	0.0878896	0.731167	0.495797
0.199541	0.211465	0.402516	0.0584372	0.705766	0.765115
0.33615	0.0174533	0.32943	0.0546973	0.510819	0.700453
0.279204	0.083838	0.599332	0.00124666	0.663691	1.00582
0.219802	0.0900713	0.95728	0.038179	0.415917	0.404138
0.196778	0.294368	0.580788	0.067008	0.620058	0.606208
0.200923		0.309484	0.0299199	0.598865	0.531199
0.0678441		0.573308	0.00124666	0.592164	0.624313
0.297317		0.539181	0.0397373	0.50069	0.700453
0.372835		0.619279	0.256033	0.642966	0.432428
0.295168		0.643589	0.155833	0.329586	0.622858
0.328936		0.566608	0.122017	0.671639	0.673618
0.296089		0.618032	0.107992	0.736933	0.538797
0.0749048		0.596683	0.193856	0.545103	0.808277
0.00445131		0.603852	0.131211	0.503807	0.630456
0.00153493		0.636265	0.172195	0.408282	0.549628
0.299466		0.560998	0.129809	0.658705	1.22858
0.219342		0.677872	0.285641	0.280499	0.380375
0.0592484		0.603852	0.00451915	0.631122	0.687035
0.158712		0.846016	0.0920971	0.623331	0.404138
0.163931		0.275668	0.0110641	0.593099	0.889104
0.167461		0.406567	0.0483081	0.717298	0.565794
0.00567925		0.398308	0.0115316	0.611332	0.767863
0.771193		0.585931	0.00576581	0.101759	1.23941
0.620039		0.462823	0.0426981	0.711844	0.363725
0.184179		0.502716	0.0878896	0.749867	0.790333
0.0981684		0.588112	0.0584372	0.714804	0.711284
0.0312106		0.397529	0.0546973	0.419502	0.682509
0.0165126		0.356545	0.00124666	0.681145	0.773683
0.311018		0.604942	0.0565673	0.607436	0.770288
0.680465		0.552115	0.0152716	0.779163	0.292919
0.449288		0.568166	0.00342832	0.915517	0.538797
0.224644		0.456434	0.175312	0.570815	0.387973
0.453643		0.35187	0.0402048	0.0955254	0.52538
0.181457		0.311665	0.119212	0.122796	0.916101
0.153876		0.158014	0.129809	0.434929	0.808277
0.204139		0.567387		0.485263	0.0462334
0.00199603		0.542921		0.508638	1.4549
0.00290332		0.467498		0.524689	0.581959
0.0760306		0.588424		0.66525	0.580504
0.416263		0.623331		0.493834	0.591335
0.438401		0.76358		0.418567	0.389589
0.665404		0.528117		0.303874	0.481733
0.624939		0.747997		0.259773	0.621888
0.266198		0.00171416		0.640628	0.424022
0.400839		0.00171416		0.367298	0.495797
0.404831		0.00233749		0.660886	0.549628
0.00671392		0.72244		0.713246	0.513094
		0.623331		0.690806	0.541869
		0.659951		0.467498	0.730521
		0.803162		0.395815	0.308115
		0.663847		0.504119	0.3301
		0.656056		0.85256	0.312641
		0.649978		0.779163	0.628193
		0.548687		0.670548	0.61429
		0.805187		0.623331	0.52829
		0.48012		0.713558	0.646621
		0.632057		0.740517	0.528128
		0.527805		0.287355	0.168445
		0.583282		0.641875	0.475105
		0.623331		0.608527	0.538797
		0.754542		0.433059	0.470255
		0.480432		0.623331	0.404138
		0.630655		0.67834	0.496444
		0.538402		0.745971	0.500485
		0.572685		0.657925	0.576786
		0.450201		0.714181	0.595538
		0.623331		0.546505	0.484966
		0.680054		0.42293	0.612997
		0.264292		0.545414	0.50291
		0.555232		0.608838	0.463466
		0.13386		0.783215	0.549628
		0.672574		0.464381	0.533463
		0.333482		0.527494	0.323311
		0.637511		0.71683	1.06693
		0.85708		0.395036	0.656159
		0.648731		0.727271	0.646621
		0.287667		0.734595	0.279987
		0.561465		0.630031	0.638539
		0.578763		0.779163	0.507759
		0.388179		0.634083	0.339476
		0.184506		0.486977	0.236825
		0.302783		0.55118	0.406887
		0.590138		0.505054	0.365179
		0.570036		0.545414	0.650339
		0.596839		0.227672	0.308762
		0.330054		0.51939	0.052538
		0.71683		0.701247	0.0733915
		0.575023		0.417943	0.136599
		0.180143		0.697351	0.506466
		0.541986		0.714025	0.505496
		0.48464		0.789604	0.578565
		0.517053		0.731011	0.44827
		0.260396		0.675223	0.627546
		0.553206		0.499444	0.484966
		0.463446		0.528429	0.45797
		0.659016		0.366674	0.459748
		0.548063		0.779163	0.571452
		0.221438		0.727271	0.579211
		0.486977		0.64281	0.505496
		0.107836		0.823731	0.583414
		0.045659		0.61663	0.578565
		0.368388		0.81033	0.325736
		0.578763		0.979564	0.456838
		0.467498		0.584217	0.518429
		0.72244		0.768099	0.61526
		0.623331		0.183103	0.356612
		0.659951		0.365895	0.278209
		0.803162		0.759684	0.535079
		0.663847		0.0883571	0.431135
		0.656056		0.753918	0.366473
		0.649978		0.799889	0.479793
		0.548687		0.735842	0.468801
		0.805187		0.786176	0.56838
		0.48012		0.736621	0.438733
		0.632057		0.542298	0.565794
		0.527805		0.51939	0.404138
		0.583282		0.701247	0.544455
		0.623331		0.467498	0.0733915
		0.754542		0.714181	0.609602
		0.480432		0.792097	0.423052
		0.630655		0.774644	0.667637
		0.538402		0.688313	0.514387
		0.572685		0.525935	0.479631
		0.450201		0.761866	0.646621
		0.623331		1.01291	0.406402
		0.680054		0.723687	0.591497
		0.264292		0.779163	0.637569
		0.555232		0.564893	0.561591
		0.13386		0.67008	0.585031
		0.672574		0.740205	0.540252
		0.333482		0.350623	0.709829
		0.637511		0.302471	0.555771
		0.85708		0.896038	0.218396
		0.648731		0.604942	0.539767
		0.287667		0.623331	0.751212
		0.561465		0.779163	0.587779
		0.578763		0.896038	0.808277
		0.388179		0.654497	0.490947
		0.184506		0.677093	0.498383
		0.302783		0.723531	0.583737
		0.590138		0.524221	0.303104
		0.570036		0.848353	0.663434
		0.596839		1.11685	0.409473
		0.330054		0.695325	0.712738
		0.71683		0.747997	0.413999
		0.575023		0.735374	0.61429
		0.180143		0.623331	0.727449
		0.541986		0.645615	0.602489
		0.48464		0.450201	0.323311
		0.517053		0.0416073	0.434691
		0.260396		0.623331	0.396864
		0.553206		0.883104	0.345619
		0.463446		0.185285	0.603459
		0.659016		0.704675	0.6172
		0.548063		0.506456	0.565794
		0.221438		0.51939	0.296799
		0.486977		0.462823	0.242483
		0.107836		0.514248	0.404138
		0.045659		1.55833	0.323311
		0.368388		0.488224	0.548012
		0.578763		0.604942	0.480925
		0.467498		0.75049	0.404138
		0.662289		0.801447	0.569997
		0.675223		0.709039	0.288393
		0.662289		0.420592	0.223408
		0.831056		0.759684	0.182671
		0.745815		0.812979	0.476398
		0.461732		0.610397	0.464759
		0.536688		0.683015	0.497737
		0.616318		0.734595	0.353702
		0.818121		0.745503	0.565794
		1.24666		0.645615	0.862108
		0.420748		0.458771	0.569997
		0.549466		0.661042	0.668122
		0.52874		0.609306	0.444552
		0.973954		0.597774	0.606208
		0.493522		0.582502	0.291626
		0.484172		0.514248	0.646621
		0.59606		0.478562	0.355642
		0.467498		0.51378	0.524733
		0.347351		0.64842	0.593598
		0.834796		0.369947	0.0389589
		0.727271		0.707169	0.3301
		0.203517		0.480432	0.440511
		0.734595		0.695325	0.323311
		0.405165		0.85708	0.544455
		1.03894		0.681768	0.468316
		0.756879		0.706078	0.333333
		0.665405		0.7748	0.727449
		0.578763		0.768723	0.149208
		0.701247		0.578762	0.28904
		0.688313			0.708859
		0.657925			0.636599
		0.373998			0.729712
		0.498665			0.479631
		0.695325			0.154543
		0.470147			0.618978
		0.443811			0.754446
		0.690183			0.421112
		0.524844			0.634659
		0.550557			0.682509
		0.504119			0.668607
		0.629096			0.514711
		0.597307			0.586647
		0.418099			0.639832
		0.382569			0.473812
		0.439136			0.609926
		0.368388			0.61235
		0.649355			0.61526
		0.467498			0.569027
		0.603072			0.405593
		0.517053			0.553831
		0.518299			0.580504
		0.536688			0.476398
		0.439136			0.478823
		0.498665			0.664565
		1.32458			0.534109
		0.675223			0.467022
		0.47529			0.108794
		0.313379			0.563369
		0.610864			0.598125
		0.805187			0.438733
		0.151937			0.634174
		1.86999			0.484966
		0.740205			0.274167
		0.000934996			0.349499
		0.00779163			0.607662
		0.629876			0.540899
		0.536688			0.450049
		0.623331			0.747656
		0.779163			0.600388
		0.592164			0.916101
		0.545414			0.387973
		0.669613			0.595538
		0.619123			0.557388
		0.690183			0.532169
		0.753139			0.619625
		0.85708			0.431135
		0.611332			0.52538
		0.747997			0.424345
		0.81033			0.840608
		0.747997			0.086324
		0.908972			0.0591659
		0.587333			0.0635306
		0.671327			0.0984481
		0.669457			0.90527
		0.341274			0.681216
		0.398308			0.916101
		0.477004			0.552376
		0.270681			0.371807
		0.545414			0.661332
		0.51939			0.45797
		0.615539			0.949725
		0.632992			0.565794
		0.63159			0.431135
		0.599332			0.50291
		0.789604			0.896379
		0.556478			0.436469
		0.599956			0.606208
		0.654497			0.363725
		0.685664			0.538797
		0.639693			1.61655
		0.272707			0.687035
		0.311665			0.646621
		0.470615			0.292919
		0.727271			0.646621
		0.740205			0.484966
		0.328495			0.579211
		0.623331			0.270611
		0.598086			0.240705
		0.675223			0.946815
		0.564893			0.720336
		0.517209			0.736502
		0.485886			0.838021
		0.501781			0.822987
		0.436331			0.78516
		0.536688			0.695118
		0.675223			0.850792
		0.467498			0.840608
		1.01291			0.721629
		0.436331			0.749273
		0.734595			0.72066
		0.289381			0.56935
		0.241541			0.626414
		0.795526			0.732299
		0.515494			0.734724
		0.623331			0.817329
		0.876559			0.646621
		0.801447			0.826867
		0.598397			0.90527
		0.581412			0.705464
		0.42854			0.636437
		0.934996			0.687035
		0.389582			0.78516
		0.529831			0.561267
		0.563335			0.762043
		0.841496			0.706434
		0.623331			0.463628
		0.672885			0.681216
		0.584372			0.769964
		0.498665			0.689783
		0.657146			0.646621
		0.434461			0.799709
		0.180766			0.671516
		0.503807			0.538797
		0.542453			0.496444
		0.359662			0.565794
		0.657146			0.61817
		0.656679			0.669738
		0.675223			0.562561
		0.604631			0.549628
		0.658705			0.272874
		0.357324			0.683317
		0.462667			0.808277
		0.462667			0.513094
		0.443811			0.606208
		0.539493			0.373424
		0.656211			0.708212
		0.419813			0.658746
		0.451915			0.453282
		0.592164			0.823957
		0.831056			0.641933
		0.155833			0.535079
		0.538402			0.304235
		0.506456			0.90527
		0.0518923			0.660039
		0.0283615			0.646621
		0			0.307145
		0.571438			0.68461
		0.815161			0.868898
		0.604631			0.119787
		0.580788			0.484966
		0.556323			0.693501
		0.7187			0.344488
		0.530766			0.722761
		0.282525			0.640155
		0.638758			0.377789
		0.796461			0.69237
		0.505054			0.0163272
		0.580788			0.715972
		0.442876			0.586001
		0.327249			0.30957
		0.510664			0.541222
		0.623331			0.395086
		0.741452			0.606208
		0.512066			0.383931
		0.654497			0.549628
		0.747997			0.675073
		0.493522			0.443906
		0.036309			0.311833
		0.51939			0.165535
		0.825913			0.723246
					0.690107
					0.697381
					0.610249
					0.404138
					0.615907
					0.505173
					0.414646
					0.538797
					0.61429
					0.213547
					0.512771
					0.284837
					0.78128
					0.0279664
					0.532169
					0.374232
					0.470255
					0.482541
					0.36033
					0.460879
					0.564824
0.240294	0.53435			0.53435	0.723687	0.872663	0.645615
0.548531	0.354208			0.682703	0.583905	0.72618	0.571438
0.168767	0.0986421			0.67086	0.632525	0.675223	0.63159
0.623331	0.22923			0.680677	0.574088	0.645615	0.564893
0.546973	0.155833			0.583593	0.415606	0.623331	0.498665
0.401269	0.0135574			0.656835	0.61289	0.654497	0.460486
0.850067	0.00825913			0.488224	0.512066	0.109083	0.740205
0.563335	0.00296082			0.477783	0.533104	0.00451915	0.00872663
0.124199	0			0.561621	0.686755		1.09083
0.0194791	0.129029			0.403607	0.483081	0.46033	0.649355
	0.307146			0.67756	0.619123	0.630343	0.759684
0.0185441	0.0607747			0.807525	0.670704	0.504119	0.448019
	0.134639			0.63159	0.652004		0.601047
0.00109083	0.690183			0.576893	0.504898	0.00342832	0.71683
0.58484	0.280499			0.461888	0.492743	0.667899	0.747997
0.685664	0.155833			0.442409	0.55679		0.662289
0.724622	0.30216			0.645147	0.522351		0.934996
0.841496	0.00233749			0.53435	0.775112	0.986888	0.571438
0.571438	0.00171416			0.5437	0.499132	0.966162	0.690183
0.087578	0.350623			0.640005	0.663691	0.584372	0.685664
8.92609e-08				0.525935	0.611332	1.24666	1.3506
0.680054				0.656211	0.580632	0	0.896038
0.473575	0.00592164			0.592164	0.701247	0.565673	0.736621
1.0285	0.00140249			0.706078	0.331456	0.667899	0.392075
0.997329				0.714804	0.511599	0.70374	0.356233
1.03894				0.908972	0.511599	0.51939	0.818121
0.580788				0.747997	0.754542	0.506456	0.498665
0.606033				0.558348	0.758438	0.76358	0.0067008
0.116874				0.538714	0.675223	1.30899	0.553206
0.107057				0.534818	0.85708	0.727271	0.42854
0.00109083				0.645615	0.657925	0.747997	0.525935
0.0927204				0.659328	0.713714	0.529831	0
0.0643589				0.593722	0.785085	0.71683	0.63346
0.0709039				0.903829	0.903829	0.529831	0.592164
0.779163				0.69143	0.361999		0.506456
0.753139				0.747062	0.655121	0.389582	0.594969
0.71683				0.752516	0.718233	0.649355	0.701247
0.623331				0.597307	0.570036	0.876559	0.727271
0.349688				0.617721	0.831056	0.229697	0.67008
0.526247				0.601047	0.678651	0.690183	0.571438
0.72244				0.719012	0.793344		0.00966163
0.567698				0.640161	0.74675	0.000934996	0.000467498
0.00202583				0.637823	0.603852	0.818121	0.503807
0.567698				0.663535	0.751893	0.550557	0.771372
0.753139				0.593567	0.88139	0.681768	0.530922
0.677872				0.510819	0.840406	0.82716	0.743166
0.264448				0.505054	0.701247	0.841496	0.363558
0.254007				0.623331	0.713869	0.467498	0.379453
0.506456				0.614137	0.544479	0.00109083	0.592164
0.648576				0.717765	0.753918	0.85708	0.779163
0.769034				0.740984	0.883104	0.694235	0.27598
0.394724				0.756568	0.920815	0.53435	0.872663
0.62785				0.476225	0.883104	0.161131	0.278629
0.146639				0.364181	0.708259	0.410775	0.769969
0.467498				0.768723	0.681768	0.512066	0.848353
0.46329				0.39301	0.560998	0.222685	0.25167
0.841496				0.65777	0.592164	0.727271	0.690183
0.429163				0.615383	0.684729	0	0.949177
0.619746				0.678963	0.696104	0.139626	0.555232
0.571438				0.539804	0.963358	0.623331	0.723531
1.03894				0.693611	0.791162	0.536688	0.554141
0.699377				0.653562	0.798642	0.545414	0.475913
0.652939				0.655121	0.747997	0.592164	0.639693
0.520949				0.502093	0.6933	0.529831	0.841496
				0.734128	0.418255	0.225022	0.934996
0.00202583				0.6746	0.652939		0.701247
0.0115316				0.594813	0.915517		0.297485
				0.697819	0.733037		0.536688
0.872663				0.678651	0.779163		0.00109083
0.532792				0.655744	0.532169		0.00498664
0.747997				0.864092	0.707169
0.732414				0.678495	0.768723		0.0311665
0.775423				0.732258	0.790227
0.512066				0.676937	0.0995771		0.865806
0.578295				0.787578	0.765606		0.85708
0.540116				0.353896	0.791786		0.623331
0.545414				0.566608	0.736309		0.608527
0.581723				0.650134	0.328028		0.954475
0.67008				0.850379	0.779163		0.687066
0.695325				0.674911	0.762801		0.561621
0.779163				0.662756	0.554608		0.551336
0.287667				0.72618	0.854586		0.779163
0.0952138				0.695325	1.00777		0.145392
0.0260241				0.641719	0.300601		0.000155833
				0.53996	0.796461		0.752048
0.00545414				0.732414	0.551336		0.75236
0.000623331				0.764515	0.876559		0.508482
0.00467498				0.836821	0.42293		0.610397
				0.541986	0.704364		0.675223
0.75236				0.699221	0.449577		0.701247
0.270681				0.628629	0.779163		0.536688
0.823731				0.722129	0.301536		1.14272
0.549933				0.766853	0.536064		0.85708
0.611332				0.529831	0.538869		0.00498664
0.662289				0.52313	0.7561		0.512066
0.0274265				0.696105	0.71309		1.03894
0.0479965				0.725401	0.623331		0.000311665
0.548063				0.49586	0.699065		0.595437
0.724778				0.659016	0.623331		0.577828
0.127939				0.419502	0.626603		1.47168
0.587333				0.638602	0.562868		0.523286
0.675223				0.776514	0.683794		0.662289
0.674288				0.540895	0.499132		0.623331
0.71683				0.467498	0.783838		0.259773
0.196193				0.590294	0.626291		0.0727739
0.576113				0.52313	0.53622		0.687534
0.13386				0.739426	0.488847		0.467498
0.623331				0.667899	0.715272		0.623331
0.363558				0.604942	0.639693		0.779163
				0.901648	0.321483		0.681768
0.00109083				0.548843	0.94606		0.903829
0.000779163				0.623331	0.717454		0.578763
0.11516				0.52313	0.727271		0.707169
0.233749				0.727271	0.664159
0.00405165				0.730699	0.484016		0.528117
0.53435				0.718389	0.546193		0.598397
0.243099				0.831056	0.650134		0.638135
0.580477				0.533104	0.758905		0.623331
0.256345				0.657925	0.725245		0.647952
0.431189				0.704987	0.682235		0.779163
0.384907				0.714181	0.66338		0.571438
0.605098				0.6372	0.498976		0.675223
0.752048				0.417632	0.582035		0.0194791
0.35935				0.606033	0.545414		0.524689
0.767476				0.494613	0.534974		0.554141
0.85708				0.827471	0.559751		0.913803
0.49586				0.740205	0.670704		0.571438
0.403762				0.721817	0.623331		0.320859
0.342832				0.676937	0.542453		0.770904
0.00264915				0.709974	0.811265		0.779163
0.00233749				0.415606	0.556167		0.589515
				0.444902	0.623331		0.803162
0.843366				0.868144	0.587489		0.529831
0.467498				0.623331	0.550245		0.578763
0.20305				0.559595	0.660263		0.876559
0.514871				0.79537	0.626136		0.96102
0.72618				0.753139	0.646706		0.623331
0.398308				0.516741	0.716051		0.598709
0.247151				0.805967	0.632836		0.00327249
0.188402				0.675223	0.758905		0.0188558
0.868144				0.753139	0.763892		0.727271
0.00155833				0.815161	0.228918		0.604475
				0.717454	0.82903		0.529831
				0.814381	0.652316		0.779163
				0.567075	0.706857		0.623331
				0.505365	0.756879		0.649355
				0.64281	0.617565		0.450201
				0.81033	0.493055		0.410775
				1.0648	0.697195		0.756879
				0.481367	0.597307		0.601047
				0.487445	0.64094		0.489782
				0.973954	0.689404		0.335664
				0.727271	0.663224		0.00186999
				0.58297	0.690183		0.601047
				0.762489	0.602605		0.545414
				0.407347	0.589047		0.662289
				0.494613	0.613046		0.578763
				0.879364	0.247306		0.81033
				0.486977	0.549154		0.588424
				0.639381	0.529831		0.620526
				0.448019	0.76358		0.648576
				0.513001	0.542142		0.498665
				0.42854	0.566296		0.634395
				0.698754	0.666185		0.512066
				0.557258	0.356233		0.578763
				0.82716	0.96102		0.687534
				0.633771	0.657925		0.688313
				0.421995	0.405788		1.09083
				0.553673	0.577516		0.506456
				1.55833	0.865806		0.571438
				0.864092	0.506456		0.675223
				0.746127	0.70561		0.589982
				0.680054	0.779163		0.71683
				0.67195	0.829497		0.779163
				0.645615	0.801447		0.529831
				0.594502	0.773397		0.712311
				0.411398	0.793344		0.85708
				0.545414	0.773553		0.963358
				0.545414	0.738491		0.584372
				0.457213	0.813758		0.391763
				0.727271	0.760619		0.604631
				0.689248	0.934996		0.934996
				0.545414	0.255566		0.567698
				0.564426	0.683482		0.129809
				0.703896	0.736153		0.409061
				0.903829	1.05966		0.267097
				0.129809	0.528429		0.645615
				0.587645	0.678651		0.603852
				0.71683	0.851158		0.564893
				0.678495	0.354987		0.818121
				0.53435	0.850067		0.00872663
				0.680054	0.625512		0
				0.411242	0.657925		0.405944
				0.639381	0.711688		0.389582
				0.69143	0.789292		0.459706
				0.563803	0.813758		0.0291407
				0.634706	0.720726		0.592164
				0.997329	0.706389		0.890428
				0.378518	0.96102		0.580788
				0.551336	0.839471		0.514248
				0.597774	0.66712		0.630031
				0.572997	0.752048		0.48651
				0.659328	0.654497		0.582035
				0.757658	0.768723		0.549154
				0.478095	0.779163		0.0225957
				0.831056	0.21427		0.597307
				0.70374	0.654497		0.747997
				0.816251	0.85708		0.399399
				0.790227	0.890428		0.384439
				0.708104	0.565517		0.85708
				0.779163	0.529831		0.759684
				0.762801	0.666185		0.662289
				0.689404	0.0289849		0.81033
				0.607747	0.665873		0.681768
				0.448798	0.779163		0.623331
				0.628473	0.704364		0.623331
				0.673353	0.594969		0.607747
				0.843366	0.673665		0.732414
				0.779163	0.548998		0.841496
				0.370103	0.7187		0.85708
				0.831056	0.314626		0.649355
				0.755165	0.2939		0.00186999
				0.718544	0.769658		0.134016
				0.571438	0.479809		0.322729
				0.85708	0.657614		0.46407
				0.436331	0.497262		0.29094
				0.506456	0.693455		0.486977
				0.594969	0.783059		0.779163
				0.599332	0.71496		0.580788
				0.554141	0.727271		0.934996
				0.727271	0.743166		0.53435
				0.779163	0.641719		0.685664
				0.720103	0.496327		0.675223
				0.503495	0.662289		0.662289
				0.498665	0.689248		0.00171416
				1.00185	0.516429
				0.0673197	0.769346		0.354987
				0.831056	0.481367		0.81033
				0.744568	0.635797		0.467498
				0.645615	0.800201		0.160975
				1.86999	0.42854		0.467498
				0.805187	0.571438		0.575334
				0.000935	0.779163		0.494925
				0.406412	0.80659		0.85708
				0.536376	0.603852		0.000467498
				0.607747	0.526714		0.224555
				0.520793	0.649355		0.408905
				0.628941	0.580788		0.779163
				0.51004	0.535441		0.740205
				0.664938	0.666496		0.59419
				0.611332	0.631278		0.429786
				0.798019	0.501314		0.467498
				0.490405	0.587333		0.681768
				0.693455	0.273642		0.71683
				0.401113	0.5624		0.61289
				0.801447	0.713402
				0.712311	0.399243		0.049399
				0.610397	0.627694
				0.311665	0.614916		0.114225
				0.644836	0.725557		0.0389582
				0.506456	1.24666		0.525468
				0.657458	0.43415		0.264916
				0.767632	0.656679		0.238736
				0.607747	0.513313		0.595437
				0.683326	0.798642		0.326781
				0.559283	0.521104		0.42854
				0.560998	0.644056		0.593722
				0.720726	0.737868		0.620837
				0.744568	0.701247		0.687534
				0.545414	0.075423		0.48386
				0.442409	0.512066		0.612267
				0.5437	0.497106		0.436331
				0.616318	0.594502		0.378518
				0.256501	0.66634		0.753139
				0.473575	0.585931		0.81033
				0.662912	0.630811		0.542765
				0.623331	0.487756		0.652004
				0.574088	0.628629		0.656679
				0.731167	0.588112		0.846016
				0.441474	0.75049		0.00498664
				0.542765	0.533415		0.00607747
				0.642498	0.618188		0.359038
				0.389582	0.728206		0.49586
				0.545414	0.547752		0.555232
				0.694234	0.569724		0.590917
				0.640316	0.684417		0.592164
				0.63533	0.638602		0.354208
				0.773397	0.653251		0.637511
				0.467498	0.354519		0.779163
				1.15316	0.592164		0.645615
				0.580788	0.58671		0.602605
				0.628629	0.727271		0.557725
				0.614604	0.760463		0.00218166
				0.585619	0.451915
				0.599956	0.596683
				0.48947	0.701247
				0.493522	0.943255
				0.581567	0.484795
				0.560998	0.591073
				0.588736	0.721817
				0.514404	0.779163
				0.485886	0.891363
				0.556478	0.791942
				0.677093	0.831056
				0.705766	0.741608
				0.556478	0.834172
				0.841496	0.811576
				0.756879	0.220815
				0.667587	0.740205
				0.512066	0.632057
				0.733037	0.681768
				0.683326	0.498665
				0.716207	0.790695
				0.75236	0.86082
				0.29842	0.662289
				0.436643	0.359973
				0.370103	0.724466
				0.484328	0.717765
				0.710909	0.601047
				0.582191	0.623331
				0.712311	0.934996
				0.619279	0.779163
				0.672418	0.85708
				1.00185	0.710909
				0.462044	0.779163
				0.516741	0.701247
				0.565984	0.687378
				0.539804	0.741763
				0.766541	0.769346
				0.526559	0.664159
				0.666185	0.736309
				0.772151	0.815784
				0.474043	0.636265
				0.524377	0.790383
				0.535441	0.521416
				0.801759	0.509261
				0.751737	0.522507
				0.688936	0.638914
				0.701247	0.333638
				0.578762	0.544168
				0.29951	0.356233
				0.579542	0.779163
				0.335352	0.644524
				0.451603	0.491808
				0.801759	0.657925
				0.66151	0.67647
				0.605566	0.691897
				0.813446	0.689871
				0.565984	0.180454
				0.697351	0.360908
				0.293277	0.667275
				0.340806	0.694235
				0.68208	0.611487
				0.562712	0.533104
				0.779163	0.747529
				0.560998	0.623331
				0.640472	0.742231
				0.655432	0.743166
				0.673976	0.538402
				0.750802	0.609773
				0.591385	0.596683
				0.659328	0.770748
				0.453941	0.67382
				0.53435	0.51565
				0.502872	0.373998
				0.745348	0.602137
				0.557413	0.328963
				0.582191	0.155833
				0.612267	0.0236866
				0.648264	0.486042
				0.499755	0.755165
				0.654497	0.573776
				0.383193	0.560998
				0.745503	0.351247
				0.695637	0.779163
				0.611332	0.736621
				0.656211	0.457525
				0.717765	0.623331
				0.791162	0.96102
				0.657614	0.709974
				0.717454	0.545414
				0.704208	0.675223
				0.00373998	0.654497
				0.00171416	0.824978
					0.623331
					0.681768
					0.560998
					0.703273
					0.822485
					0.803785
					0.701247
					0.623331
					0.545414
					0.701247
					0.675223
					0.498665
					0.589982
					0.831056
					0.85708
					0.74114
					0.831056
					0.486977
					0.737556
					0.756256
					0.753139
					0.695325
					1.01291
					0.687534
					0.664938
					0.739114
					0.876559
					0.354519
					0.736621
					0.541363
					0.64281
					0.981746
					0.768723
					0.665873
					0.890428
					0.364648
					0.688936
					0.770748
					0.28268
					0.741763
					0.554141
					0.779163
					0.623331
					0.759684
					0.710753
					0.684729
					0.75049
					0.495392
					0.759684
					0.776047
					0.761866
					0.713246
					0.734595
					0.716051
					0.53061
					0.821706
					0.705299
					0.779163
					0.410152
					0.512534
					0.47264
					0.6933
					0.850067
					0.467498
					0.631901
					0.718544
					0.764515
					0.877026
					0.731479
					0.703584
					0.334417
					0.592164
					0.596527
					0.734595
					0.64281
					0.656679
					0.515494
					0.580477
					0.81033
					0.559595
					0.616786
					0.764359
					0.744568
					0.280499
					0.661665
					0.762801
					0.685664
					0.615539
					0.714649
					0.633771
					0.785397
					0.531701
					0.580788
					0.457836
					0.575334
					0.779163
					0.368388
					0.628006
					0.818121
					0.48947
					0.646706
					0.501314
					0.601514
					0.637044
					0.545414
					0.763736
					0.462979
					0.56614
					0.829653
					0.628629
					0.741296
					0.825913
					0.728206
					0.51752
					0.615851
					0.666652
					0.779163
					0.528584
					0.926737
					0.678963
					1.12979
					0.682235
					0.607747
					0.766229
					0.819056
					0.768099
					0.834796
					0.629096
					0.418255
					0.85708
					0.79163
					0.660886
					0.665405
					0.701247
					0.656679
					0.883104
					0.800512
					0.841496
					0.822485
					0.74114
					0.796928
					0.701247
					0.0531389
					0.840873
					0.73927
					0.792721
					0.571438
					0.741919
					0.478562
					0.571438
					0.783682
					0.768411
					0.712311
					0.903829
					0.239359
					0.82716
					0.734595
					0.792409
					0.769813
					0.770437
					0.731167
					0.109083
					0.513624
					0.652783
					0.779163
					0.676625
					0.733972
					0.306523
					0.745503
					0.557258
					0.567075
					0.685664
					0.814537
					0.444123
					0.753139
					0.591697
					0.67008
					0.740673
					0.69143
					0.571438
					0.559439
					0.459083
					0.612734
					0.671639
					0.143834
					0.501158
					0.701247
					0.715428
					0.835886
					0.480432
					0.820147
					0.645615
					0.665873
					0.623331
					0.973954
					0.49695
					0.820147
					0.696728
					0.573932
					0.75236
					0.418567
					0.119835
					0.671015
					0.736933
					0.520949
					0.379141
					0.491808
					0.75797
					0.712311
					0.769658
					0.119835
1.01291
1.00185	0.986888
0.883104	0.890428
0.85708	0.883104
0.821706	0.818121
0.805187	0.807525
0.796461	0.761866
0.796461	0.760463
0.779163	0.753139
0.779163	0.747997
0.779163	0.71683
0.747997	0.685664
0.740205	0.675223
0.727271	0.663847
0.71683	0.637511
0.71683	0.636265
0.71683	0.63533
0.688313	0.623331
0.685664	0.612267
0.667899	0.562712
0.667899	0.551336
0.667899	0.545414
0.659951	0.545414
0.653718	0.538402
0.650757	0.53248
0.646238	0.529831
0.640005	0.512066
0.638914	0.506456
0.632992	0.502093
0.623331	0.483081
0.623331	0.478562
0.623331	0.472329
0.623331	0.467498
0.617721	0.467498
0.611332	0.467498
0.60915	0.467498
0.601047	0.455966
0.600267	0.45285
0.598242	0.451915
0.59419	0.448019
0.59045	0.436331
0.589982	0.43041
0.589982	0.423865
0.588736	0.42293
0.586398	0.420748
0.586242	0.417476
0.585307	0.415606
0.584372	0.412489
0.584372	0.332859
0.580788	0.319924
0.576581	0.319613
0.573464	0.31821
0.571438	0.311665
0.571438	0.308081
0.571438	0.301692
0.567387	0.289381
0.567231	0.279252
0.562712	0.264292
0.554764	0.243566
0.549933	0.222685
0.549154	0.220036
0.545414	0.218945
0.545414	0.210842
0.545414	0.190428
0.545414	0.181545
0.543233	0.149755
0.533415	0.145392
0.529831	0.122796
0.529831	0.102382
0.51939	0.101915
0.517364	0.078695
0.517209	0.059061
0.516741	0.041296
0.516274	0.039737
0.516274	0.038335
0.51565	0.036621
0.513313	0.032257
0.511443	0.025401
0.51004	0.025245
0.51004	0.020414
0.509105	0.017297
0.506456	0.016986
0.505054	0.016051
0.503963	0.015583
0.503339	0.014648
0.500846	0.014337
0.498665	0.014181
0.493522	0.012467
0.493522	0.009662
0.49212	0.009662
0.490873	0.00748
0.489782	0.006077
0.486977	0.004675
0.483081	0.004363
0.482925	0.003428
0.481679	0.003272
0.481367	0.002805
0.481055	0.002493
0.480432	0.002337
0.479653	0.002182
0.479497	0.002182
0.47716	0.00187
0.476692	0.00187
0.476225	0.001714
0.473264	0.001714
0.47077	0.001714
0.469991	0.001558
0.468433	0.001402
0.467498	0.001402
0.467498	0.001091
0.467498	0.001091
0.467498	0.000779
0.467498	0.000779
0.467498	0.000779
0.467498	0.000468
0.462667	0.000468
0.461576	0.000468
0.457836	0.000468
0.45285	0.000312
0.451915	0.000312
0.451447
0.448798
0.4435
0.43789
0.435552
0.434773
0.433682
0.431501
0.430721
0.43041
0.42854
0.42854
0.42293
0.42293
0.421995
0.421216
0.421216
0.420125
0.418255
0.417476
0.411087
0.409684
0.409061
0.408749
0.4061
0.403762
0.40236
0.400646
0.399555
0.398308
0.395503
0.394568
0.386621
0.384439
0.381323
0.380855
0.37992
0.378518
0.378518
0.377271
0.376648
0.374778
0.374778
0.37057
0.367298
0.365428
0.363558
0.363558
0.360908
0.360129
0.356857
0.354208
0.352805
0.350623
0.350623
0.350623
0.350623
0.348753
0.347195
0.340027
0.338313
0.337689
0.331144
0.331144
0.331144
0.329586
0.328963
0.32382
0.321639
0.320548
0.317275
0.316964
0.311665
0.304965
0.301069
0.295926
0.29468
0.292186
0.288602
0.283148
0.28268
0.279875
0.278317
0.273954
0.260708
0.259773
0.259773
0.247462
0.24606
0.234216
0.232814
0.230477
0.222685
0.218166
0.207725
0.203673
0.181857
0.175312
0.170637
0.166741
0.154274
0.149132
0.147418
0.147418
0.127939
0.123264
0.12077
0.119524
0.116875
0.112355
0.109706
0.109395
0.096928
0.092565
0.090383
0.086643
0.085396
0.08415
0.082124
0.081033
0.071527
0.070125
0.069813
0.061554
0.058749
0.058593
0.048152
0.045971
0.044256
0.043789
0.042542
0.041763
0.040361
0.038023
0.034595
0.031946
0.026024
0.026024
0.025712
0.025712
0.02431
0.023531
0.021193
0.020414
0.019479
0.019479
0.019012
0.018544
0.018388
0.018388
0.018077
0.012311
0.010441
0.008259
0.007792
0.007168
0.006545
0.006389
0.005766
0.00561
0.005298
0.005142
0.004987
0.004831
0.004675
0.00374
0.003584
0.003584
0.003428
0.003272
0.002961
0.002337
0.002337
0.002182
0.002182
0.001714
0.001558
0.001402
0.001402
0.001247
0.001247
0.001091
0.001091
0.000935
0.000935
0.000935
0.000779
0.000779
0.000779
0.000779
0.000623
0.000623
0.000623
0.000468
0.000468
0.000468
0.000312
0.000156
0.000156
0.000156
0.000156
0.000156
0.000156
						0.842086	0.580406
						0.861463	0.56465
						0.00162984	0.905469
						0	0.784679
						0.181094	0.885368
						0.6306	1.14687
						0.915982	0.784679
						0	0.12079
						0	0.744114
						0	0.810395
						0.00093009	0.796813
						0	0.82778
						0.745931	0.905469
						0.00093009	0.823615
						0	0.724375
						0	0.603586
						0	0.698479
						0	0.677472
						0.465044	0.845165
						0.744071	0.762043
						0.664393	0.302789
						0	0.769649
						0.0258875	0.803151
						0.968842	0.709344
						0	0.412894
						0.620059	0.711155
						0	0.719667
						0	0.706628
						0.0258875	0.647954
						0.554798	0.00814922
						0.00170516	0.677472
						0	0.737233
						0.00046504	0.664071
						0.00031003	0.778703
						0.00046504	0.905469
						0	1.14687
						0.110991	0.786853
						0	0.664071
						0.359324	0.892611
						0	0.537305
						0	0.69033
						0	0.6092
						0.00031003	0.695219
						0	0.781963
						0.00046504	0.737233
						0.00093009	0.690591
						0	0.620059
						0	0.558053
						0	0.0603007
						0	0.682065
						0	0.723454
						0.558053	0.930088
						0.602852	0.697566
						0.668268	0.645946
						0.631065	0.332197
						2.17021	0.465044
						0.00124012	0.744071
						0.00186018	0.813827
						0	0.516664
						0.689816	0.403038
						0.00077507	0.697566
						0.662068	0.711673
						0	0.631995
						0	0.607658
						0	0.726864
						0	0.442102
						0	0.652302
						0.00155015	0.576965
						0	0.555418
						0.295923	0.0895985
						0	0.573554
						0	0.481321
						0	0.620059
						0	0.713068
						0.691676	0.0128662
						0.594171	0.597117
						0	0.651062
						0.531546	0.775074
						0.671679	0.868082
						0	0.657262
						0.00124012	0.36816
						0.00170516	0.25841
						0.662378	0.303829
						0.503798	0.631685
						0	0.389552
						0	0.793365
						0	0.596187
						0	0.0979693
						0	0.422725
						0	0.510929
						0	0.483336
						0.689816	0.442877
						0.813827	0.46861
						1.1885	0.715393
						0.775074	0.542552
						0	0.511549
						0	0.402418
							0.73632
							0.719733
							0.769493
							0.775074
							0.620059
							0.744071
							0.852581
							0.359944
							0.341032
							0.658813
							0.930088
							0.760347
							0.671679
							0.711673
							0.723454
							1.29174
							0.500543
							0.500853
							0.202759
							0.135328
							0.871958
							0.651062
							0.594171
							0.595102
							0.531546
							0.711208
							0.41668
							0.627345
							0.775074
							0.439157
							0.658813
							0.682065
							0.7419
							0.678189
							0.403038
							0.693846
							0.759572
							0.57836
							0.744071
							0.744071
							0.590296
							0.930088
							0
							0.562393
							0.549527
							0.465044
							1.0851
							0.811502
							0.575725
							0.628275
							0.755697
							0.723454
							0.706867
							0.723454
							0.749186
							0.726709
							0.664858
							0.671679
							0.698961
							0.671679
							0.135328
							0.0897535
							0.620059
							0.682065
							0.613548
							0.594171
							0.596187
							0.775074
							0.73632
							0.723454
							0.147109
							0.106185
							0.73632
							0.624089
							0.594171
							0.67974
							0.697566
							0.658813
							0.620059
							0.716943
							0.581305
							0.465044
							0.930088
							0.863587
							0.704542
							0.480081
							0.643931
							0.841575
							0.775074
							0
							0
							0.992094
							0.639436
							0
							0.0372035
							0
							0
							0
							0.863587
							0.581305
							0.611843
							0.555418
							0.620059
							0.697566
							0.697566
							0.645946
							0.0141063
							0
							0
							0.403038
							0.117501
							0
							0.00186018
							0
							0.406914
							0
							0.209735
							0.406914
							0.0885134
							0.480546
							0.00031003
							0.00077507
							0
							0.584871
							0.596187
							0.542552
							0.620059
							0.571694
							0
							0.590606
							0.511549
							0.73632
							0.00093009
							0.300884
							0.620059
						1.39793	1.39793
						1.24261	1.39793
						1.16494	1.39793
						0.931955	1.39793
						0.698966	1.32027
						0.673027	1.24261
						0.673027	1.24261
						0.673027	1.24261
						0.621303	1.16494
						0.621303	1.16494
						0.601888	1.08728
						0.599092	1.08728
						0.595364	1.08728
						0.590238	1.08728
						0.588064	1.08728
						0.584802	1.08728
						0.582472	1.04845
						0.582472	1.04845
						0.571599	1.04845
						0.559173	1.03556
						0.54364	1.00962
						0.54364	1.00962
						0.54364	1.00962
						0.54364	1.00962
						0.54364	0.983678
						0.536651	0.931955
						0.534942	0.931955
						0.524225	0.931955
						0.524225	0.931955
						0.521118	0.931955
						0.520341	0.931955
						0.517701	0.912539
						0.517701	0.90089
						0.512575	0.893123
						0.510401	0.893123
						0.504809	0.893123
						0.504809	0.893123
						0.504809	0.893123
						0.497043	0.893123
						0.493004	0.880231
						0.488189	0.873708
						0.485393	0.86299
						0.480112	0.86299
						0.465977	0.854292
						0.465977	0.854292
						0.453551	0.854292
						0.443766	0.854292
						0.443766	0.854292
						0.441902	0.854292
						0.414254	0.854292
						0.388315	0.838759
						0.360511	0.838759
						0.333329	0.838759
						0.332863	0.833168
						0.275703	0.828353
						0.235319	0.828353
						0.22662	0.828353
						0.111679	0.828353
						0.00186391	0.828353
						0.00108728	0.828353
						0.0006213	0.825091
						0.00031065	0.815461
						0.00031065	0.815461
						0.00031065	0.815461
						0.00031065	0.815461
						0.00046598	0.812509
						0.0006213	0.809869
						0.00077663	0.809869
						0.00108728	0.807694
						0.00108728	0.807694
						0.00139793	0.807694
						0.00155326	0.807694
						0.00155326	0.807694
						0.00155326	0.804898
						0.00170858	0.802568
						0.00170858	0.798841
						0.00201924	0.798841
						0.00248521	0.796821
						0.00248521	0.796045
						0.00341717	0.796045
						0.00776629	0.794958
						0.00792162	0.792162
						0.0159986	0.787657
						0.0455105	0.784085
						0.047219	0.783619
						0.0498596	0.783619
						0.0538981	0.783619
						0.0556066	0.776629
						0.0848079	0.776629
						0.090089	0.776629
						0.104379	0.776629
						0.123173	0.776629
						0.143366	0.776629
						0.194157	0.776629
						0.194157	0.776629
						0.200992	0.776629
						0.217456	0.776629
						0.218233	0.776629
						0.240444	0.776629
						0.285799	0.776629
						0.29776	0.776629
						0.310652	0.776629
						0.311894	0.776629
						0.316554	0.776629
						0.320282	0.776629
						0.321214	0.76529
						0.334572	0.762494
						0.349483	0.759388
						0.349483	0.756437
						0.355075	0.754417
						0.356317	0.752088
						0.356473	0.75069
						0.359735	0.745564
						0.362375	0.745564
						0.362375	0.745564
						0.366724	0.74137
						0.368899	0.737798
						0.381325	0.737798
						0.388315	0.737798
						0.388315	0.737798
						0.388315	0.734225
						0.390178	0.733448
						0.392664	0.732206
						0.395304	0.732206
						0.400585	0.732206
						0.405556	0.730963
						0.406798	0.730031
						0.40773	0.72708
						0.410681	0.724906
						0.412701	0.724906
						0.414254	0.724906
						0.414254	0.724906
						0.414254	0.724906
						0.420467	0.722576
						0.427146	0.72009
						0.427146	0.719159
						0.427146	0.719003
						0.427146	0.718382
						0.431495	0.718382
						0.43367	0.716829
						0.434912	0.714499
						0.434912	0.714499
						0.434912	0.713411
						0.440038	0.711858
						0.442057	0.709994
						0.443766	0.709994
						0.444698	0.708596
						0.446562	0.708286
						0.447183	0.707664
						0.457279	0.698966
						0.460386	0.698966
						0.460852	0.698966
						0.465977	0.698966
						0.465977	0.698966
						0.465977	0.698966
						0.465977	0.698966
						0.465977	0.698966
						0.465977	0.698966
						0.465977	0.698966
						0.465977	0.698966
						0.465977	0.69384
						0.465977	0.691976
						0.465977	0.691976
						0.469084	0.690579
						0.472501	0.690268
						0.473744	0.689647
						0.47421	0.688404
						0.478869	0.687938
						0.479646	0.686695
						0.480112	0.684832
						0.480112	0.68421
						0.482287	0.683434
						0.483219	0.683434
						0.486014	0.678774
						0.487102	0.673027
						0.488189	0.673027
						0.488189	0.673027
						0.488189	0.673027
						0.48881	0.673027
						0.490519	0.669765
						0.495489	0.666969
						0.496111	0.666348
						0.497043	0.665726
						0.497043	0.665726
						0.498751	0.665726
						0.499217	0.665726
						0.50046	0.663707
						0.501858	0.662931
						0.502479	0.662775
						0.502479	0.662154
						0.504809	0.660601
						0.504809	0.660135
						0.504809	0.660135
						0.508381	0.660135
						0.510401	0.660135
						0.510401	0.656562
						0.510401	0.655786
						0.510401	0.655786
						0.517701	0.652368
						0.517701	0.651436
						0.517701	0.649573
						0.517701	0.649573
						0.517701	0.647243
						0.517701	0.647243
						0.517701	0.646311
						0.517701	0.646311
						0.517701	0.644291
						0.51972	0.643515
						0.521118	0.643515
						0.522205	0.643515
						0.522827	0.641962
						0.524225	0.641962
						0.524225	0.641496
						0.525778	0.637923
						0.526399	0.635438
						0.528108	0.632953
						0.528108	0.62907
						0.528884	0.62907
						0.529972	0.628293
						0.53137	0.628293
						0.532612	0.627206
						0.532612	0.626118
						0.532612	0.621303
						0.533078	0.621303
						0.534942	0.621303
						0.537738	0.621303
						0.537738	0.621303
						0.538515	0.621303
						0.54364	0.621303
						0.54364	0.621303
						0.54364	0.621303
						0.54364	0.621303
						0.54364	0.621303
						0.54364	0.621303
						0.54364	0.621303
						0.54364	0.621303
						0.550164	0.621303
						0.552805	0.621303
						0.559173	0.621303
						0.559173	0.621303
						0.559173	0.621303
						0.559173	0.613071
						0.564765	0.610586
						0.564765	0.610275
						0.565852	0.608411
						0.565852	0.608411
						0.566939	0.608411
						0.566939	0.606547
						0.568026	0.604683
						0.56958	0.599092
						0.56958	0.599092
						0.56958	0.599092
						0.56958	0.598626
						0.575637	0.598315
						0.57688	0.595364
						0.57688	0.595364
						0.578123	0.595364
						0.578899	0.595364
						0.582472	0.593966
						0.582472	0.593966
						0.582472	0.593034
						0.582472	0.593034
						0.584802	0.593034
						0.590238	0.592568
						0.590238	0.592102
						0.5935	0.591791
						0.593966	0.590238
						0.595364	0.590238
						0.600334	0.590238
						0.603441	0.590238
						0.604062	0.590238
						0.604062	0.590238
						0.605771	0.590238
						0.608411	0.5862
						0.610896	0.582472
						0.621303	0.582472
						0.621303	0.582472
						0.621303	0.582472
						0.621303	0.582472
						0.621303	0.582472
						0.621303	0.582472
						0.621303	0.579521
						0.621303	0.578123
						0.621303	0.57688
						0.621303	0.57688
						0.632331	0.57688
						0.638544	0.574706
						0.640719	0.572997
						0.647243	0.572065
						0.647243	0.571754
						0.649573	0.570667
						0.652368	0.56958
						0.660135	0.56958
						0.660135	0.56958
						0.660135	0.56958
						0.660135	0.56958
						0.668367	0.56958
						0.673027	0.56958
						0.673027	0.56958
						0.673027	0.56958
						0.67955	0.566007
						0.683434	0.564454
						0.684521	0.563677
						0.698966	0.563056
						0.698966	0.563056
						0.714499	0.563056
						0.724906	0.563056
						0.724906	0.559173
						0.776629	0.559173
						0.776629	0.559173
						0.776629	0.559173
						0.776629	0.559173
						0.776629	0.559173
						0.931955	0.558396
							0.554668
							0.554668
							0.554668
							0.554668
							0.552339
							0.549543
							0.548145
							0.547679
							0.547679
							0.547368
							0.546902
							0.54597
							0.54364
							0.54364
							0.54364
							0.54364
							0.54364
							0.54364
							0.54364
							0.54364
							0.54364
							0.538515
							0.537117
							0.536651
							0.535874
							0.534942
							0.534321
							0.53401
							0.53401
							0.532612
							0.532612
							0.532612
							0.531059
							0.531059
							0.529506
							0.529195
							0.528108
							0.528108
							0.528108
							0.525778
							0.524225
							0.522205
							0.521429
							0.520031
							0.517701
							0.517701
							0.517701
							0.517701
							0.517701
							0.517701
							0.517701
							0.517701
							0.515682
							0.515682
							0.51242
							0.510401
							0.510401
							0.508381
							0.504809
							0.504809
							0.50046
							0.497043
							0.497043
							0.491917
							0.488189
							0.488189
							0.488189
							0.487102
							0.486636
							0.48648
							0.485393
							0.484306
							0.482287
							0.479491
							0.476384
							0.474831
							0.473588
							0.472501
							0.46955
							0.465977
							0.465977
							0.465977
							0.465977
							0.465977
							0.465977
							0.465977
							0.465977
							0.465977
							0.465977
							0.465977
							0.465977
							0.465977
							0.465977
							0.465977
							0.462716
							0.459764
							0.454328
							0.453085
							0.452464
							0.448115
							0.446562
							0.446562
							0.443766
							0.443766
							0.443766
							0.440038
							0.440038
							0.431495
							0.427146
							0.427146
							0.427146
							0.427146
							0.424505
							0.423573
							0.423108
							0.418137
							0.416118
							0.414254
							0.414254
							0.414254
							0.414254
							0.414254
							0.410837
							0.405866
							0.40276
							0.401207
							0.400741
							0.399343
							0.399343
							0.397945
							0.388315
[truncated: 1,537 more rows]

## Sheet: Figure 2b (and 1e)
Processive runs in µm-1 min-1									Per experiment average of Processive runs in µm-1 min-1
Khc FL + osk 3'UTR	Khc FL + Tm1 FL+ osk 3'UTR	Khc940 + osk 3'UTR	Khc940 + Tm1 FL+ osk 3'UTR	Khc910 + osk 3'UTR	Khc910 + Tm1 FL+ osk 3'UTR	Khc ΔAMB + osk 3'UTR	Khc ΔAMB + osk 3'UTR + Tm1 FL		Khc FL + osk 3'UTR	Khc FL + Tm1 FL+ osk 3'UTR	Khc940 + osk 3'UTR	Khc940 + Tm1 FL+ osk 3'UTR	Khc910 + osk 3'UTR	Khc910 + Tm1 FL+ osk 3'UTR	Khc ΔAMB + osk 3'UTR	Khc ΔAMB + osk 3'UTR + Tm1 FL
0.163726	0.0560998	0.374936	0.199564	0.351349	0.536558				0.110412	0.0944018	0.595313	0.160587	0.461643	0.683963
0.0798665	0.0560998	0.411803	0.0927269	0.335124	1.18176				0.0533786	0.0105643			0.616057	0.675859	0.048009	0.107855
0.131566	0.0393683	0.555944	0.267142	0.383195	0.494475				0.158949	0.0864394
0.110253	0.0897596	0.727219	0.13909	0.626006	0.431081										0.0192718	0.0731316
0.08468	0.102465	0.906663	0.105849	0.551683	0.775946										0.164749	0.14343
0.0923782	0.222618		0.159148	0.522498					0.306924	0.0333261	1.03173	0.320229
			0.101081	1.1015					0.545387	0.246713	1.75701	1.06424
0.0415554	0.0245554			0.387007	0.545262	0.0428242	0.139712
0.0384772	0.00713737			0.52321	0.707241	0.0221958	0.0506648
0.0449998	0			0.605772	0.758726	0.0554072	0.081304
0.0566664				0.443887	0.806811	0.0533014	0.0785711
0.0798167				0.366041	0.803354	0.0526758	0.0820172
0.0352829					0.785323	0.0148412	0.138053
0.0613112					0.653246	0.0335927	0.0196841
0.0392502					0.933209	0.0759388	0.0545065
0.057412					0.716812	0.081304	0.0826516
0.0790137					0.811944		0.0955906
					0.6351		0.115561
				0.804298	0.467498		0.177041
				0.689751	0.453331		0.101735
				0.934996	0.58709		0.160122
				0.789552	0.417998		0.156838
					0.730801		0.12085
							0.167594
							0.118901
0.116097	0.102935
0.180551	0.069259
0.158474	0.0316948
0.303242	0.0146093
0.185051	0.0923453
0.136551	0.126779
0.152122	0.0875315
0.132709	0.101081
0.0950843	0.155833
0.129603	0.0823267
0.116097
0.180551
0.158474
0.303242
0.185051
0.136551
0.152122
0.132709
0.0950843
0.129603
						0.0241458	0.129257
						0	0.162477
						0	0.0184163
						0	0.0658523
						0	0.0905469
						0.017304	0.0334327
						0.0226851	0.086925
						0.0254819	0.0439015
						0.056369	0.151645
						0	0.128658
						0.0413373	0.14448
						0	0.0535303
						0.0453702	0.0627908
						0.0202193	0.122201
						0.017716	0.0395782
						0.00934762	0.0695393
						0	0.0604936
						0	0.0831364
						0.0409731	0.128923
						0.0193768	0.0697566
						0.0170658	0.106731
						0.0124012	0.121161
						0.0279726	0.127887
						0.0267651	0.0902998
						0.0315284	0.045742
						0.026574	0.0297628
						0.0377063	0.0483163
							0.0269591
							0.0600057
							0.00890037
							0.059621
							0.01806
							0.0273555
							0.0141998
							0.0290653
						0.0399409	0.117309
						0.110727	0.0887576
						0.201504	0.102132
						0.0776629	0.108841
						0.158938	0.0877134
						0.0550909	0.123438
						0.22812	0.0734875
						0.205957	0.146697
						0.356919	0.0869181
						0.168426	0.0875662
						0.215067	0.342351
						0.158631	0.119204
							0.227653
							0.0449135
							0.104129
							0.159556
							0.0633983
							0.0986776
							0.0897438
							0.135066
							0.116011
							0.133136
							0.165681
							0.180037
							0.204429
							0.169446
							0.215554
							0.153498
							0.214551
							0.174742
							0.240504
							0.166421
							0.191617
							0.0753787
0.31217	0.0126345	0.622827	0.323539
0.287421	0.0482917	0.742485	0.519736
0.353309	0.0157473	1.4289	0.260142
0.277231	0.0319577	1.17796	0.363051
0.206417	0.0458981	1.12537	0.454117
0.3882	0.00703346	1.35344	0.379807
0.217654	0	0.987498	0.308593
0.259987	0.0222109	0.924197	0.553885
0.472014	0.0643741	0.810255	0.0881695
0.368469	0.0351673	1.03584	0.265228
0.249638	0.0499746	1.01282	0.307197
0.363162	0.0999492	0.98138	0.179909
0.400337	0	0.770164	0.278525
0.256626		1.47108	0.153976
0.239191			0.367555
0.258959
0.367309	0.0979492	1.3801	1.07227
0.459137	0.153046	1.84565	0.999967
0.667835	0.10203	1.3571	1.02209
0.0992728	0.250438	2.49304	1.16262
0.314146	0.317864	1.3902
0.808081	0.558949	1.47438
1.10193		2.76446
		1.63207
		1.47614

## Sheet: Figure 2c (and 1f)
Processive Khc fraction									Per experiment average of Processive Khc fraction
Khc FL + osk 3'UTR	Khc FL + Tm1 FL+ osk 3'UTR	Khc940 + osk 3'UTR	Khc940 + Tm1 FL+ osk 3'UTR	Khc910 + osk 3'UTR	Khc910 + Tm1 FL+ osk 3'UTR	Khc ΔAMB + osk 3'UTR	Khc ΔAMB + osk 3'UTR + Tm1 FL		Khc FL + osk 3'UTR	Khc FL + Tm1 FL+ osk 3'UTR	Khc940 + osk 3'UTR	Khc940 + Tm1 FL+ osk 3'UTR	Khc910 + osk 3'UTR	Khc910 + Tm1 FL+ osk 3'UTR	Khc ΔAMB + osk 3'UTR	Khc ΔAMB + osk 3'UTR + Tm1 FL
0.903226	0.692308	0.963855	0.710526	1	1				0.841461	0.818162	0.982807	0.732673	1	0.995238
0.941176	0.75	1	0.6	1	1				0.769631	0.311404			0.993339	0.998333	0.817996	0.895543
0.857143	0.666667	0.970588	0.916667	1	1				0.684746	0.444949
0.888889	1	1	0.818182	1	1										0.391408	0.898129
0.583333	0.8	0.979592	0.75	1	0.97619										0.767957	0.743905
0.875	1		0.666667	1					0.80516	0.241735	0.991341	0.463906
			0.666667	1					0.761861	0.555135	0.974944	0.960859
0.642857	0.684211			1	1	0.75	0.928571
0.714286	0.25			1	0.983333	0.5	0.785714
0.692308	0			0.985714	0.99	0.8	1
0.888889				1	1	0.923077	0.666667
0.84				0.978723	1	0.75	0.909091
0.666667					1	1	0.846154
0.75					1	0.75	1
0.777778					1	0.888889	0.928571
0.823529					1	1	0.888889
0.9					1		0.888889
					1		0.916667
				0.97561	1		1
				1	1		0.913043
				1	1		0.933333
				1	1		0.866667
					1		0.826087
							0.904762
							0.916667
0.736842	1
0.763636	0.25
0.526316	0.166667
0.705882	0.125
0.678571	0.266667
0.692308	0.666667
0.788462	0.5
0.6875	0.451613
0.631579	0.611111
0.636364	0.411765
						0.5	1
							1
							1
							0.833333
						0	1
						0.285714	1
						0.166667	1
						1	1
						1	1
						0	1
						0.5	1
							1
						0.333333	1
						0.25	1
						0.5	1
						0.2	1
						0	1
						0	1
						0.625	0.875
						0.5	1
						0.25	1
						0.2	1
						0.666667	1
						0.4	0.714286
						1	0.428571
						0.125	1
						0.5	1
							0.4
							0.6
							0.25
							0.833333
							1
							1
							0.5
							1
							0.782609
						0.833333	0.666667
						0.875	0.866667
						0.823529	0.571429
						1	0.888889
						0.555556	0.545455
						1	0.857143
						0.923077	0.866667
						0.8	0.9
						0.8	1
						0.857143	0.851852
						0.923077	0.5
						0.888889	0.75
						0.75	0.818182
						0.6	0.75
						0.6	0.8
						0.8	0.615385
						0.6	0.8
						0.733333	0.833333
						0.428571	0.55
						0.745455	0.809524
						0.8	0.529412
						0.857143	0.875
						0.555556	0.818182
						0.782609	0.647059
						0.666667	0.888889
							0.240964
							0.625
							0.785714
							0.555556
							0.75
							0.8125
							0.625
							0.882353
							0.6
							0.75
							0.772727
							0.73913
							0.909091
							0.85
							0.7
							0.761905
							0.692308
							0.8
							0.833333
							0.578947
							0.916667
0.8	0.142857	1	0.575
0.756757	0.4	1	0.8125
0.842105	0.25	0.979592	0.512821
0.769231	0.2	1	0.5
0.833333	0.307692	1	0.468085
0.770833	0.0769231	0.986111	0.56
0.727273	0	1	0.302326
0.793103	0.142857	0.973333	0.5
0.826923	0.4	0.984615	0.282609
0.866667	0.222222	0.972973	0.520833
0.777778	0.333333	1	0.55
0.941176	0.666667	1	0.3
0.906977		1	0.423077
0.757576		0.982143	0.206897
0.846154			0.444444
0.666667
1	0.444444	0.957447	0.888889
0.857143	0.416667	0.944444	0.954545
0.727273	0.333333	0.967742	1
0.333333	1	0.96875	1
0.866667	0.5	1
0.611111	0.636364	0.977778
0.9375		1
		0.958333
		1

## Sheet: Extended Data 1
MT binding events in µm-1 min-1									Per experiment average of MT binding events in µm-1 min-1
Khc FL + osk 3'UTR	Khc FL + Tm1 FL+ osk 3'UTR	Khc940 + osk 3'UTR	Khc940 + Tm1 FL+ osk 3'UTR	Khc910 + osk 3'UTR	Khc910 + Tm1 FL+ osk 3'UTR	Khc ΔAMB + osk 3'UTR	Khc ΔAMB + osk 3'UTR + Tm1 FL		Khc FL + osk 3'UTR	Khc FL + Tm1 FL+ osk 3'UTR	Khc940 + osk 3'UTR	Khc940 + Tm1 FL+ osk 3'UTR	Khc910 + osk 3'UTR	Khc910 + Tm1 FL+ osk 3'UTR	Khc ΔAMB + osk 3'UTR	Khc ΔAMB + osk 3'UTR + Tm1 FL
0.181268	0.081033	0.388996	0.280868	0.351349	0.536558				0.132399	0.109224	0.605272	0.204045	0.553051	0.687748
0.0848581	0.0747997	0.411803	0.154545	0.335124	1.18176				0.0684924	0.0289			0.620151	0.677087	0.0583437	0.120815
0.153493	0.0590524	0.57279	0.291427	0.383195	0.494475				0.233482	0.20773
0.124034	0.0897596	0.727219	0.169999	0.626006	0.431081										0.0589606	0.0806164
0.145166	0.128082	0.925552	0.141131	0.551683	0.794871										0.213209	0.176383
0.105575	0.222618		0.238722	0.522498					0.380151	0.123931	1.0419	0.694775
			0.151621	1.1015					0.71132	0.44305	1.80146	1.10965
0.0646417	0.0358887			0.387007	0.545262	0.057099	0.150459
0.0538681	0.0285495			0.52321	0.719228	0.0443915	0.0644825
0.0649997	0.0222618			0.614551	0.76639	0.069259	0.081304
0.0637497				0.443887	0.806811	0.0577432	0.117857
0.0950199				0.373998	0.803354	0.0702344	0.0902189
0.0529243					0.785323	0.0148412	0.163154
0.0817483					0.653246	0.0447902	0.0196841
0.0504645					0.933209	0.0854311	0.0586993
0.0697146					0.716812	0.081304	0.092983
0.087793					0.811944		0.107539
					0.6351		0.126067
				0.824405	0.467498		0.177041
				0.689751	0.453331		0.111424
				0.934996	0.58709		0.171559
				0.789552	0.417998		0.180967
					0.730801		0.146292
							0.185235
							0.12971
0.15756	0.102935
0.236436	0.277036
0.3011	0.190169
0.429593	0.116874
0.272707	0.346295
0.197241	0.190169
0.192936	0.175063
0.193031	0.223821
0.15055	0.254999
0.203662	0.199936
						0.0482917	0.129257
						0	0.162477
						0	0.0184163
						0	0.0790228
						0.0493892	0.0905469
						0.0605639	0.0334327
						0.13611	0.086925
						0.0254819	0.0439015
						0.056369	0.151645
						0.0572362	0.128658
						0.0826745	0.14448
						0	0.0535303
						0.13611	0.0627908
						0.0808772	0.122201
						0.0354319	0.0395782
						0.0467381	0.0695393
						0.0620059	0.0604936
						0.0516716	0.0831364
						0.0655569	0.147341
						0.0387537	0.0697566
						0.0682634	0.106731
						0.0620059	0.121161
						0.0419589	0.127887
						0.0669128	0.12642
						0.0315284	0.106731
						0.212592	0.0297628
						0.0754126	0.0483163
							0.0673977
							0.10001
							0.0356015
							0.0715453
							0.01806
							0.0273555
							0.0283996
							0.0290653
						0.0745564	0.125718
						0.169446	0.115293
						0.459224	0.0887576
						0.104714	0.228901
						0.279586	0.124261
						0.0712322	0.183063
						0.154336	0.0973684
						0.141205	0.179222
						0.314142	0.0879203
						0.115463	0.0690337
						0.150502	0.144614
						0.291742	0.169446
						0.230587	0.0955851
						0.0665682	0.143378
						0.184546	0.118343
						0.25188	0.127665
						0.129438	0.176867
						0.216734	0.109642
						0.128546	0.148125
						0.306015	0.133614
						0.257446	0.181213
						0.416405	0.164179
						0.303166	0.100076
						0.274807	0.418429
						0.237946	0.184224
							0.25611
							0.186391
							0.166606
							0.203072
							0.114117
							0.13157
							0.110454
							0.216105
							0.131479
							0.221894
							0.220908
							0.232989
							0.27658
							0.186391
							0.253593
							0.219283
							0.281598
							0.252404
							0.300631
							0.199705
							0.330975
							0.0822313
0.390213	0.0884412	0.622827	0.562677
0.379807	0.120729	0.742485	0.639675
0.419554	0.0629891	1.45867	0.507276
0.360401	0.159789	1.17796	0.726101
0.2477	0.149169	1.12537	0.970159
0.503611	0.091435	1.3725	0.678227
0.299275	0.0575465	0.987498	1.02073
0.32781	0.155477	0.949517	1.10777
0.570808	0.160935	0.822915	0.311984
0.425157	0.158253	1.06461	0.509238
0.320964	0.149924	1.01282	0.55854
0.38586	0.149924	0.98138	0.599695
0.441397	0.106488	0.770164	0.658332
0.338747		1.49783	0.744216
0.282681			0.826999
0.388439
0.367309	0.220386	1.44144	1.20631
0.53566	0.367309	1.95422	1.04758
0.918274	0.306091	1.40233	1.02209
0.297818	0.250438	2.57346	1.16262
0.362476	0.635728	1.3902
1.32231	0.878349	1.50789
1.17539		2.76446
		1.70302
		1.47614

## Sheet: Extended Data 3a
Fraction of Khc events with osk									Per experiment Fraction of Khc events with osk
Khc FL + osk 3'UTR	Khc FL + Tm1 FL+ osk 3'UTR	Khc940 + osk 3'UTR	Khc940 + Tm1 FL+ osk 3'UTR	Khc910 + osk 3'UTR	Khc910 + Tm1 FL+ osk 3'UTR	Khc ΔAMB + osk 3'UTR	Khc ΔAMB + osk 3'UTR + Tm1 FL		Khc FL + osk 3'UTR	Khc FL + Tm1 FL+ osk 3'UTR	Khc940 + osk 3'UTR	Khc940 + Tm1 FL+ osk 3'UTR	Khc910 + osk 3'UTR	Khc910 + Tm1 FL+ osk 3'UTR	Khc ΔAMB + osk 3'UTR	Khc ΔAMB + osk 3'UTR + Tm1 FL
0.0322581	0	0.0843373	0.0263158	0.22314	0.111111				0.0632467	0.0333333	0.0740758	0.0702096	0.114998	0.0930416
0	0	0.0491803	0.2	0.16	0.0188679				0.0998114	0.0175439			0.0768102	0.0622576	0	0.0486628
0	0	0.0441176	0.0833333	0.08	0.0769231				0.13113	0.159216
0.222222	0	0.111111	0.181818	0.102564	0.151163										0	0.00880952
0	0	0.0816327	0	0.116883	0.107143				0.00642825	0	0.0169024	0.0017094
0.125	0.2		0	0.0526316					0.0168651	0	0.0604113	0.0375
			0	0.0697674
0	0.0526316			0.218487	0.167785	0	0.0714286
0.428571	0			0.0740741	0.158333	0	0
0.0769231	0			0.0714286	0.23	0	0.0625
0				0.12766	0.11215	0	0
0.12				0.148936	0.218487	0	0
0.047619				0.0243902	0	0	0.0769231
0.125				0	0.0392157	0	0.333333
0				0	0	0	0
0				0.0263158	0.0188679	0	0
0.2					0		0.0555556
					0		0
					0.0512821		0
					0		0
					0		0
					0		0.133333
					0		0
							0.142857
							0
0.131579	0.666667
0.109091	0.25
0.0526316	0.166667
0.0588235	0
0.232143	0.0666667
0.115385	0.111111
0.134615	0.0909091
0	0.129032
0.105263	0.111111
0.0909091	0
						0	0
							0
							0
							0
						0	0
						0	0
						0	0
						0	0
						0	0
						0	0.0833333
						0	0
							0
						0	0.125
						0	0
						0	0
						0	0
						0	0
						0	0
						0	0
						0	0
						0	0
						0	0
						0	0
						0	0
						0	0
						0	0
						0	0
							0
							0.1
							0
							0
							0
							0
							0
							0
0	0	0.0326087	0
0	0	0.0487805	0
0	0	0.0408163	0.025641
0	0	0.0172414	0
0	0	0.0172414	0
0	0	0	0
0	0	0.010989	0
0	0	0	0
0	0	0.0153846	0
0.0333333	0	0	0
0	0	0	0
0.0392157	0	0	0
0	0	0	0
0.030303		0.0535714	0
0			0
0
0	0	0.0425532	0
0	0	0.166667	0
0	0	0.0645161	0.15
0	0	0.03125	0
0	0	0.047619
0.0555556	0	0.0444444
0.0625		0.0727273
		0.0416667
		0.0322581

## Sheet: Extended Data 3b
Fraction of Khc events with Tm1					Per experiment average of Khc events with Tm1
Khc FL + Tm1 FL+ osk 3'UTR	Khc940 + Tm1 FL+ osk 3'UTR	Khc910 + Tm1 FL+ osk 3'UTR	Khc ΔAMB + osk 3'UTR + Tm1 FL		Khc FL + Tm1 FL+ osk 3'UTR	Khc940 + Tm1 FL+ osk 3'UTR	Khc910 + Tm1 FL+ osk 3'UTR	Khc ΔAMB + osk 3'UTR + Tm1 FL
0.307692	0.368421	0.581197			0.442949	0.170747	0.445546
0.75	0.3	0.471698			0.241228		0.487007	0.244759
0.666667	0.0833333	0.446154			0.647182
0.333333	0.272727	0.395349						0.490819
0.2	0	0.333333						0.0679581
0.4	0				0.487081	0.664269
	0				0.315236	0.349248
0.473684		0.442953	0.285714
0.25		0.425	0.285714
0		0.44	0.4375
		0.476636	0.0666667
		0.504202	0.272727
		0.621212	0
		0.568627	0.333333
		0.294118	0.357143
		0.528302	0.222222
		0.545455	0.222222
		0.428571	0.0833333
		0.487179	0.125
		0.375	0.304348
		0.481481	0.266667
		0.526316	0.2
		0.647059	0.347826
			0.0952381
			0.5
1
0.875
0.833333
0.5
0.6
0.611111
0.454545
0.516129
0.611111
0.470588
			0.5
			0.875
			1
			0.833333
			0.2
			0.5
			1
			1
			0.733333
			0.458333
			0.5
			0.75
			0.375
			0.444444
			0.666667
			0.5
			0.5
			0.5
			0.875
			0.666667
			0.714286
			0.470588
			0.363636
			0.142857
			0.142857
			0
			0
			0.2
			0.6
			0
			0.666667
			1
			0
			0
			0
			0.0434783
			0
			0.0666667
			0.0714286
			0.111111
			0
			0
			0.2
			0.1
			0.25
			0.0740741
			0.166667
			0.125
			0
			0
			0.2
			0
			0.2
			0
			0.05
			0
			0
			0
			0
			0
			0.166667
			0.060241
			0
			0
			0
			0
			0
			0
			0
			0
			0.0625
			0
			0.0869565
			0.181818
			0.1
			0.1
			0.0952381
			0.0769231
			0
			0.166667
			0.105263
			0.333333
0.285714	0.75
0.4	0.625
0.75	0.589744
0.6	0.615385
0.5	0.531915
0.615385	0.48
0.6	0.72093
0.714286	0.714286
0.2	0.717391
0.333333	0.75
0.333333	0.9
0.333333	0.7
0.666667	0.576923
	0.551724
	0.740741
0.222222	0.285714
0.25	0.257143
0	0.416667
0.666667	0.472222
0.388889	0.478261
0.363636	0.451613
	0.393939
	0.24
	0.307692
	0.333333
	0.3125
	0.448276
	0.142857
