# Supplementary material for: Tropomyosin 1-I/C coordinates kinesin-1 and dynein motors during oskar mRNA transport
Source: Nat Struct Mol Biol. 2024 Jan 31;31(3):476–88. doi: 10.1038/s41594-024-01212-x (PMC10948360; doi:10.1038/s41594-024-01212-x)
Supplement: Supplementary file 8 — Numerical source data file with lists of motor protein movements used for statistical analysis. [file 41594_2024_1212_MOESM8_ESM.xlsx]

## Sheet: Figure 3b
Processive velocities in µm s-1		Per experiment averages of Processive velocities in µm s-1
Khc+osk 3'UTR	Khc+osk 3UTR + Tm1 1-335	Khc+osk 3'UTR2	Khc+osk 3UTR + Tm1 1-335
0.593184	0.387783	0.402384	0.183715
0.362914	0.0618902	0.333357	0.153788
0.0604253
0.517516
0.015061	0.00868634
0.709316
0.42334	0.644651
0.399206	0.00046534
0.453643
	0.420978
0.181457	0.596566
0.362914	0.0809691
0.544372	0.672106
0.725829	0.530022
0.635965	0.000620453
0.744544
0.568801	0.0023267
0.382665	0.00046534
0.775567
0.775567	0.241356
	0.80147
0.542897	0.00155113
0.453396
0.210799
0.558408	0.398796
0.775567	1.04701
0.484729	0.00263693
0.48535
0.00294715
0.93068	0.00341249
0.129209	0.00170625
0.434317
0.496363
0.155113	0.00356761
0.400968
0.46534	0.00201647
0.46534	0.000310227
0.327444	0.000620453
0.259349
0.504118
0.46534
0.0459135
0.542897
0.46534	0.252369
0.581675	0.0155113
0.293009	0.00155113
0.237168	0.116335
0.00961702
1.31846
0.539949	0.119437
0.332408	0.00108579
0.0159767	0.0103926
0.0760055	0.318913
0.0119437	0.2533
0.0288511	0.527385
0.00372272
0.0141153
0.00093068	0.620453
0.69801	0.00263693
0.342335	0.000310227
	0.00108579
	0.581675
	0.221657
	0.509082
	0.659232
	0.145962
	0.620453
	0.199476
	0.000775567
	0.0212505
	0.00170625
	0.00356761
	0.0046534
	0.0172176
	0.000310227
	0.00201647
	0.00403295
	0.0069801
	0.387783
	0.054755
	0.434317
	0.155113
	0.0119437
	0.0482402
	0.0119437
	0.634103
	0.00496363
	0.011013
	0.299214
	0.00573919
	0.215142
	0.0291613
	0.562286
	0.516993
	0.620453
	0.00170625
	0.00310227
	0.262452
	0.000620453
	0.46534
	0.439436
	0.00201647
	0.0620453
	0.558408
	0.00279204
	0.00124091
	0.00155113
	0.00046534
	0.0947742
	0.478214
	0.00403295
	0.00093068
	0.00108579
	0.00403295
	0.00139602
	0.504118
	0.483643
	0.140998
	0.0145807
	0.011013
	0.00170625
	0.0238875
	0.00403295
	0.0133397
0.779163	0.42293
0.350623	0.321327
0.59419	0.303718
0.479497	0.141184
0.0853963	0.262422
0.218166	0.108148
0.112355	0.549933
0.069813	0.337689
0.623331	0.261176
0.740205	0.295303
0.467498	0.571438
0.409061	0.595281
0.503339	0.603852
0.365428	0.457057
0.45285	0.389582
0.646238	0.0236866
0.821706	0.467498
0.586398	0.409061
0.278317	0.210842
0.301069	0.146015
0.493522	0.106745
0.513313	0.130276
0.331144	0.37618
0.328963	0.280031
0.623331	0.170481
0.395503	0.304185
0.883104	0.51939
0.481679	0.294368
0.331144	0.297485
0.175312	0.356233
0.00015583	0.300134
0.0004675	0.491496
0.00062333	0.198375
0.00015583	0.353273
0.00218166	0.148041
0.00124666	0.119835
0.00373998	0.0824355
0.00498665	0.00872663
0.166741	0.659328
0.623331	0.168767
0.632992	0.467498
0.467498	0.083838
0.483081	0.0232191
0.398308	0.00264915
0.273954	0.0604631
0.688313
0.461576	0.00841496
0.394568	0.027894
0.279875	0.00311665
0.805187	0.00342832
0.667899
0.260708	0.0205699
0.481367	0.0183883
0.352805	0.0439448
0.399555	0.035374
0.51565	0.0255566
0.409684	0.0148041
0.0585931
0.479653	0.00389582
0.29468
0.517209	0.340027
0.549933	0.0892921
0.378518	0.0339715
0.337689	0.0797863
0.0587489	0.254631
0.421995	0.124354
0.0925646	0.0603072
0.476692	0.0180766
0.71683	0.0359973
0.529831	0.00638914
0.0481523	0.0211932
0.0403607	0.0158949
0.467498	0.107213
0.0841496	0.113758
0.779163	0.00140249
0.60915	0.0107525
0.489782	0.0508014
0.653718
0.207725
0.0821238	0.00529831
0.00031167
0.00015583
0.000935	0.00623331
0.00109083	0.00140249
0.00015583	0.601047
0.000935	0.00654497
0.00062333	0.253228
0.000935	0.00233749
0.00342832
0.00467498
0.00233749
0.00529831
0.00077916	0.00218166
0.617721	0.00498664
1.00185	0.00685664
0.500846	0.00342832
0.360908
0.42293	0.0709039
0.350623	0.178584
0.311665	0.20679
0.571438	0.174221
0.493522	0.121238
0.292186	0.00311665
0.584372
0.0715272	0.354208
0.00327249
0.0071683	0.000934996
0.00077916
0.00015583	0.000311665
0.00171416
0.00296082	0.0540739
0.0615539	0.243255
0.467498	0.00311665
0.467498	0.10394
0.433682	0.0246216
0.247462	0.155833
0.480432	0.0225957
0.043789	0.0236866
0.363558
0.498665	0.00872663
0.386621
0.170637
0.481055	0.186064
0.331144	0.0303874
0.545414	0.256656
	0.00124666
0.026024	0.00186999
	0.000623331
0.640005	0.00233749
0.549154	0.185285
0.580788	0.00483081
0.598242	0.227204
0.543233	0.081968
0.585307	0.18061
0.562712	0.155833
0.467498	0.0194791
0.59045	0.185441
0.650757
0.554764	0.163624
0.259773	0.0425423
0.85708	0.0398932
0.47077
0.288602
0.378518	0.0222841
0.516274	0.0504898
0.71683	0.246683
0.338313	0.118744
0.457836	0.00140249
0.295926	0.00109083
0.51004
0.567387	0.0492431
0.4061	0.0599956
0.43789	0.0172974
0.24606
0.545414	0.542298
0.232814	0.139314
0.147418	0.610397
0.516741	0.138535
0.451915	0.0779163
0.43041
0.51939
0.796461
0.509105
0.0701247	0.142587
0.109706	0.138535
0.586242	0.000934996
0.28268
0.796461	0.00451915
0.0319457
0.0104408
0.00015583
0.00358415
0.00514248
0.00218166
0.00140249
0.0183882
0.00077916
0.00077916
0.00825913
0.00654497
0.0442565
0.467498
0.374778
0.545414
0.49212
0.589982
0.747997
0.462667
0.486977
0.4435
0.42854
0.329586
0.571438
0.259773
0.347195
0.149132
0.448798
0.411087
0.417476
0.430721
0.47716
0.482925
0.567231
0.374778

## Sheet: Figure 3c
Processive runs in µm-1 min-1		Per experiment averages of Processive runs in µm-1 min-1
Khc+osk 3'UTR	Khc+osk 3UTR + Tm1 1-335	Khc+osk 3'UTR2	Khc+osk 3UTR + Tm1 1-335
0.0270495	0.0148909	0.0402643	0.0247856
0.0137816	0.0201228	0.158949	0.058883
0.0764031	0.0487267
0	0.013822
0.0448966	0.0238636
0.0545168	0.0123269
0.0435406	0.0326554
0.0310227	0.0173959
0	0.07024
0.0769157	0
0.0286363	0.00778812
0.0645026	0.00974534
0.0226995	0.0385109
0.0948464	0.0355674
0.0251535	0.026667
	0.0122458
	0.0367858
0.116097	0.0181553
0.180551	0.0569541
0.158474	0.0439998
0.303242	0.0277036
0.185051	0.0723868
0.136551	0.182781
0.152122	0.0102185
0.132709	0.076973
0.0950843	0.0458331
0.129603	0.0157142
	0.0123841
	0.02253
	0.0678235
	0.070833
	0.0724803
	0.124666
	0.0795741

## Sheet: Figure 3d
Processive Khc fraction		Per experiment averages of Processive Khc fraction
Khc+osk 3'UTR	Khc+osk 3UTR + Tm1 1-335	Khc+osk 3'UTR2	Khc+osk 3UTR + Tm1 1-335
0.5	0.285714	0.747222	0.293954
0.5	0.4	0.684746	0.437561
1	0.5
0	0.130435
1	0.333333
0.875	0.333333
1	0.6
1	0.25
0	0.5
1	0
1	0.1
1	0.25
1	0.272727
0.666667	0.375
0.666667	0.208333
	0.125
	0.333333
0.736842	0.68
0.763636	0.555556
0.526316	0.111111
0.705882	0.142857
0.678571	0.2
0.692308	0.466667
0.788462	0.555556
0.6875	0.588235
0.631579	0.647059
0.636364	0.428571
