# Supplementary material for: Tropomyosin 1-I/C coordinates kinesin-1 and dynein motors during oskar mRNA transport
Source: Nat Struct Mol Biol. 2024 Jan 31;31(3):476–88. doi: 10.1038/s41594-024-01212-x (PMC10948360; doi:10.1038/s41594-024-01212-x)
Supplement: Supplementary file 9 — Numerical source data file with peak intensities and chemical shift perturbations measured in NMR experiments. [file 41594_2024_1212_MOESM9_ESM.xlsx]

## Sheet: Figure 4c
intensity ratio (titration point/control)
	Khc 855-975 + U10 RNA 1:1.5		Khcc855-975+ U10 RNA 1:1.5 + Tm1 1-335 1:2		Khc 855-975 + U10 RNA 1:1.5 + Tm1 1-335 1:4
residue	mean	SD	mean	SD	mean	SD
939	0.905595	0.256674	0.52148	0.256674	0.26653	0.256674
940	0.984824	0.227863	0.766699	0.227863	-0.0978368	0.227863
941	0.830612	0.163629	0.708983	0.163629	0.63549	0.163629
942	0.913412	0.148065	0.484155	0.148065	0.377427	0.148065
943	0.823816	0.144271	0.554364	0.144271	0.363366	0.144271
944	0.941304	0.144928	0.683294	0.144928	0.512377	0.144928
946	0.893392	0.125777	0.776277	0.125777	0.868496	0.125777
947	0.897317	0.110246	0.737469	0.110246	0.702199	0.110246
948	1.43538	0.424016	1.20881	0.424016	0.92273	0.424016
949	0.984429	0.556112	1.29082	0.556112	1.05318	0.556112
950	0.878687	0.165503	0.694846	0.165503	0.212759	0.165503
951	1.04277	0.241371	0.731792	0.241371	0.820863	0.241371
952	0.904365	0.17963	0.940439	0.17963	0.797683	0.17963
953	0.907988	0.109459	0.63476	0.109459	0.66231	0.109459
954	0.838893	0.122739	0.732331	0.122739	0.790273	0.122739
955	0.763728	0.0989081	0.783011	0.0989081	0.545227	0.0989081
957	1.00111	0.325309	1.10134	0.325309	1.29944	0.325309
958	0.834987	0.118714	0.83847	0.118714	0.955233	0.118714
959	0.834987	0.118714	0.83847	0.118714	0.955233	0.118714
960	0.943667	0.184577	0.811857	0.184577	0.981333	0.184577
961	0.950336	0.112872	0.861533	0.112872	1.01074	0.112872
962	0.954501	0.220439	0.994783	0.220439	0.950695	0.220439
965	0.865701	0.16422	0.736726	0.16422	0.753878	0.16422
967	0.774048	0.114813	0.828931	0.114813	0.983834	0.114813
968	0.961867	0.147575	0.790167	0.147575	0.910146	0.147575
969	0.901186	0.168452	0.800837	0.168452	0.786526	0.168452
970	0.915456	0.117129	0.859897	0.117129	1.00368	0.117129
971	0.883372	0.162253	0.780015	0.162253	0.838493	0.162253
973	0.945714	0.109936	0.969957	0.109936	1.12537	0.109936
974	0.984917	0.149638	0.912665	0.149638	0.963852	0.149638
975	0.835509	0.0920692	0.885451	0.0920692	1.11205	0.0920692

## Sheet: Figure 4d
intensity ratio (titration point/control)
	Khc 855-975+Tm1 1-335 1:2		Khc 855-975+Tm1 1-335 1:2 + U10 RNA 1:1.5
residue	mean	SD		SD
937	0.414531	0.116284	0.558305	0.116284
939	0.523099	0.118965	0.400268	0.118965
940	0.766809	0.108883	0.493966	0.108883
941	0.777871	0.0773744	0.833645	0.0773744
942	0.674805	0.0749298	0.502029	0.0749298
943	0.544229	0.0700423	0.458515	0.0700423
944	0.714684	0.060347	0.502816	0.060347
946	0.790951	0.0607334	0.896399	0.0607334
947	0.958671	0.059825	0.7863	0.059825
948	1.01138	0.19517	0.674148	0.19517
949	0.920095	0.219419	0.714847	0.219419
950	0.833987	0.0771258	0.653223	0.0771258
951	0.730275	0.122486	0.847045	0.122486
952	1.07315	0.0796231	0.853261	0.0796231
953	0.636662	0.0460237	0.726657	0.0460237
954	0.832931	0.058578	0.848771	0.058578
955	0.701345	0.0507485	0.862662	0.0507485
957	1.02385	0.158972	1.29668	0.158972
958	1.07602	0.0829675	1.06216	0.0829675
959	1.07602	0.0829675	1.06216	0.0829675
960	1.38217	0.0928721	1.18218	0.0928721
961	0.915837	0.0486608	0.968472	0.0486608
962	0.8329	0.0811167	0.905093	0.0811167
963	0.787126	0.091851	1.02778	0.091851
965	1.09559	0.0807836	0.977313	0.0807836
967	0.928056	0.0532919	0.870834	0.0532919
968	0.930448	0.0648754	0.85922	0.0648754
969	0.924152	0.0677717	0.872956	0.0677717
970	1.00342	0.0635997	1.03927	0.0635997
971	1.05358	0.0735182	0.977026	0.0735182
973	1.00848	0.0448163	1.11654	0.0448163
974	1.03725	0.0712864	1.04657	0.0712864
975	1.13989	0.0441047	1.19461	0.0441047

## Sheet: Figure 4e
intensity ratio (titration point/control)
	Khc 855-975+U10 RNA 1:1.5		Khc 855-975+U10 RNA 1:1.5+Tm1 252-334 1:2		Khc 855-975+U10 RNA 1:1.5+Tm1 252-334 1:4
residue	mean	SD	mean	SD	mean	SD
939	1.07717	0.118965	1.33237	0.118965	1.3098	0.118965
940	1.07845	0.108883	1.36833	0.108883	1.53099	0.108883
941	1.16136	0.0773744	1.03394	0.0773744	1.06205	0.0773744
942	1.14213	0.0749298	1.10151	0.0749298	1.82393	0.0749298
943	1.10479	0.0700423	1.09373	0.0700423	1.43463	0.0700423
944	1.21466	0.060347	1.25276	0.060347	1.36402	0.060347
946	1.30371	0.0607334	1.57092	0.0607334	1.50167	0.0607334
947	1.25321	0.059825	1.49564	0.059825	1.26876	0.059825
948	1.63811	0.19517	1.47601	0.19517	2.42203	0.19517
949	1.32898	0.219419	1.5062	0.219419	0.765348	0.219419
950	1.21121	0.0771258	1.3228	0.0771258	0.948587	0.0771258
951	0.978977	0.122486	1.22962	0.122486	1.54749	0.122486
952	1.24577	0.0796231	1.53019	0.0796231	1.37103	0.0796231
953	1.06781	0.0460237	1.0669	0.0460237	1.15624	0.0460237
954	1.05604	0.058578	1.48738	0.058578	1.46471	0.058578
955	1.14479	0.0507485	1.37998	0.0507485	1.27905	0.0507485
957	1.17429	0.158972	1.74949	0.158972	1.36488	0.158972
958	1.03874	0.0829675	1.48195	0.0829675	1.54288	0.0829675
959	1.03874	0.0829675	1.48195	0.0829675	1.54288	0.0829675
960	1.27575	0.0928721	1.33263	0.0928721	1.26739	0.0928721
961	1.19428	0.0486608	1.15708	0.0486608	1.33962	0.0486608
962	0.938153	0.0811167	1.06456	0.0811167	1.57635	0.0811167
965	1.02383	0.0807836	1.3017	0.0807836	1.13002	0.0807836
967	0.970542	0.0532919	1.32194	0.0532919	1.3653	0.0532919
968	1.13777	0.0648754	1.3265	0.0648754	1.30421	0.0648754
969	1.03055	0.0677717	1.27312	0.0677717	1.17845	0.0677717
970	1.22919	0.0635997	1.56228	0.0635997	1.44621	0.0635997
971	0.966736	0.0735182	1.16462	0.0735182	1.43067	0.0735182
973	1.05275	0.0448163	1.39709	0.0448163	1.43176	0.0448163
974	1.07047	0.0712864	1.14829	0.0712864	1.21486	0.0712864
975	1.26125	0.0441047	1.40009	0.0441047	1.44597	0.0441047

## Sheet: Figure 4g
intensity ratio (titration point/control)
	Khc 855-975 + Khc 1-365 1:1		Khc 855-975 + Khc 1-365 1:1 + Tm1 1-335 1:1.25
residue	mean	SD		SD
937	0.649173	0.0482821	0.677376	0.0482821
939	0.621934	0.0359391	0.462937	0.0359391
940	0.691688	0.0359063	0.590295	0.0359063
941	0.684168	0.0253748	0.486872	0.0253748
942	0.503254	0.0219489	0.440698	0.0219489
943	0.483278	0.0212296	0.432027	0.0212296
944	0.447154	0.0191588	0.421144	0.0191588
946	0.419087	0.0157796	0.43894	0.0157796
947	0.519823	0.0172817	0.492745	0.0172817
948	0.604207	0.0727474	0.732972	0.0727474
949	0.67455	0.101862	0.910283	0.101862
950	0.684168	0.0253748	0.472383	0.0253748
951	0.745177	0.0433872	0.683381	0.0433872
952	0.455918	0.0230507	0.558337	0.0230507
953	0.174733	0.0132412	0.205122	0.0132412
954	0.408282	0.0159426	0.425928	0.0159426
955	0.221203	0.0136522	0.269942	0.0136522
957	0.722785	0.0808304	0.766329	0.0808304
958	0.49831	0.026387	0.589679	0.026387
959	0.49831	0.026387	0.589679	0.026387
960	0.790521	0.0258788	0.836413	0.0258788
961	0.644134	0.0134964	0.613916	0.0134964
962	0.802073	0.0289333	0.800895	0.0289333
963	0.978023	0.0216881	1.00134	0.0216881
965	0.869042	0.0242074	0.887113	0.0242074
967	0.886839	0.0165989	0.790632	0.0165989
968	0.845567	0.0174509	0.778763	0.0174509
969	0.920416	0.0202116	0.837587	0.0202116
970	0.93532	0.0164913	0.917113	0.0164913
971	0.998198	0.0255355	1.01981	0.0255355
973	0.941805	0.0113657	0.979962	0.0113657
974	0.867978	0.0233939	0.973793	0.0233939
975	0.978817	0.0110249	1.07814	0.0110249

## Sheet: Figure 4h
chemical shift perturbations in ppm
residue	Khc 855-975 + Khc 1-365 1:1	Khc 855-975 + Khc 1-365 1:1 + Tm1 1-335 1:1.25
937	0.0054	0.01384
939	0.01076	0.01622
940	0.01096	0.01753
941	0.01006	0.00312
942	0.01267	0.0162
943	0.00965	0.01187
944	0.01589	0.01362
946	0.00399	0.00584
947	0.00432	0.00809
948	0.00552	0.06845
949	0.01321	0.02676
950	0.01006	0.00312
951	0.01017	0.01276
952	0.01308	0.00877
953	0.01236	0.0117
954	0.00723	0.00699
955	0.01337	0.01068
957	0.04022	0.00989
958	0.00246	0.00432
959	0.00343	0.00416
960	0.00862	0.00684
961	0.07173	0.0609
962	0.0042	0.01077
963	0.00177	0.00363
965	0.0007	0.00107
967	0.00634	0.00417
968	0.00486	0.00696
969	0.00388	0.0087
970	0.00266	0.00752
971	0.00221	0.00483
973	0.00159	0.00475
974	0.00332	0.00502
975	0.00155	0.00341
