# Supplementary material for: Tropomyosin 1-I/C coordinates kinesin-1 and dynein motors during oskar mRNA transport
Source: Nat Struct Mol Biol. 2024 Jan 31;31(3):476–88. doi: 10.1038/s41594-024-01212-x (PMC10948360; doi:10.1038/s41594-024-01212-x)
Supplement: Supplementary file 10 — Numerical source data file with lists of motor protein movements used for statistical analysis. [file 41594_2024_1212_MOESM10_ESM.xlsx]

## Sheet: Figure 6b
DDBEosk + Khc FL - Tm1 minus-end-directed frequency (/µm/min)	DDBEosk + Khc FL - Tm1 plus-end-directed frequency (/µm/min)	DDBEosk + Khc FL + Tm1 minus-end-directed frequency (/µm/min)	DDBEosk + Khc FL + Tm1 plus-end-directed frequency (/µm/min)	DDBEosk + Khc940 - Tm1 minus-end-directed frequency (/µm/min)	DDBEosk + Khc940 - Tm1 plus-end-directed frequency (/µm/min)	DDBEosk + Khc940 + Tm1 minus-end-directed frequency (/µm/min)	DDBEosk + Khc940 + Tm1 plus-end-directed frequency (/µm/min)		DDBEosk + Khc FL - Tm1 minus-end-directed frequency (independent experiment averages)	DDBEosk + Khc FL - Tm1 plus-end-directed frequency (independent experiment averages)	DDBEosk + Khc FL + Tm1 minus-end-directed frequency (independent experiment averages)	DDBEosk + Khc FL + Tm1 plus-end-directed frequency (independent experiment averages)	DDBEosk + Khc940 - Tm1 minus-end-directed frequency (independent experiment averages)	DDBEosk + Khc940 - Tm1 plus-end-directed frequency (independent experiment averages)	DDBEosk + Khc940 + Tm1 minus-end-directed frequency (independent experiment averages)	DDBEosk + Khc940 + Tm1 plus-end-directed frequency (independent experiment averages)
0.00645919	0	0.242546	0	0.0539445	0.0599384	0.288007	0.0929056		0.0134902	0.00666765	0.195945	0.00444268	0.047041	0.145858	0.16116	0.0897707
0.0106328	0	0.235416	0.00653933	0.0495043	0.0495043	0.203559	0.172242		0.0158218	0.00196705	0.15999	0.00529359	0.0382923	0.126584	0.10431	0.08335
0.0222946	0	0.21909	0	0.0268908	0.0537815	0.229432	0.0637312		0.0376681	0.00655714	0.215728	0.00983792	0.0808651	0.182698	0.184193	0.174982
0	0	0.317501	0	0.0145513	0.0291026	0.0715162	0.125153
0.0109704	0.0109704	0.134262	0.00959017	0.0540757	0.0973362	0.102805	0.0411218
0.0215527	0.00718425	0.202752	0	0	0.0761864	0.21846	0.0385517
0.0438966	0.0146322	0.242061	0.00266001	0.0387634	0.0830645	0.0878225	0.131734
0	0	0.185349	0	0.0842442	0.147427	0.164772	0.0484623
0.0163336	0.0163336	0.163284	0.00837354	0.0470777	0.0706165	0.173357	0.0866785
0.0256956	0.00856519	0.143911	0	0.0351605	0.123062	0.396086	0.0396086
0.0181641	0	0.175846	0	0.0628308	0.159171	0.251863	0.0581222
0	0	0.314521	0.0114371	0.0713158	0.219041	0.092767	0.092767
0.016968	0.00848401	0.281308	0.00953586	0.0844098	0.119581	0.0961837	0.0601148
0.00807431	0.0121115	0.264413	0	0.0632031	0.189609	0.202796	0.0887233
0.00597869	0.00597869	0.0861355	0	0.0885023	0.205164	0.0823859	0.0823859
0.00659032	0	0.155581	0.0207441	0.0402948	0.147748	0.197181	0.019082
0	0	0.129786	0	0.0770001	0.154	0.0933478	0.116685
0.0209351	0	0.147545	0.0155311	0.0799465	0.116286	0.166083	0.0184536
0.0175648	0.0175648	0.0816487	0	0.04884	0.11396	0.259889	0.0556905
0.0239163	0	0.190954	0	0.0588097	0.156826	0.145208	0.145208
0.0205537	0.00513843	0.197418	0	0.0240518	0.132285	0.156191	0.0851953
0.0135518	0.0271037	0.244021	0	0.0447632	0.223816	0.0834389	0.0357595
0.00804071	0.00804071	0.0764526	0	0.0479605	0.143882	0.181424	0.138736
0.0138854	0	0.106373	0.0132966	0.0604303	0.282008	0.172658	0.115105
0.033895	0.033895	0.0950907	0	0	0.350079	0.236269	0.145396
0.00398711	0.00398711	0.161514	0	0.0135364	0.243655	0.142703	0.183475
0.00457676	0.00457676	0.221269	0	0	0.191038	0.127222	0.0424072
0.0138661	0	0.241128	0.0301411	0.0499338	0.116512	0.0435347	0.130604
0.0127649	0	0.166674	0	0.0385861	0.019293	0.0799752	0.0342751
0.00508425	0.0101685	0.156391	0.0223416	0	0.0409145	0.117097	0.146371
0.0119629	0.0119629	0.16948	0.0242114	0.0424706	0.0743235	0.148425	0.0848144
0.0342715	0	0.136411	0	0.0251116	0.0251116	0.219177	0.208218
0.0137432	0	0.0833614	0	0.0232651	0.0348977	0.0866384	0.0346553
0	0	0.115951	0	0.0376673	0.056501	0.155227	0.0840812
0.0250587	0	0.149676	0	0.056501	0.0376673	0.0918719	0.00918719
0.0520977	0	0.207662	0	0.0247192	0.0741576	0.0822176	0.0274059
0.0176197	0	0.274321	0.0182881	0.0771721	0.0289395	0.224873	0.0562183
0	0	0.291881	0	0.0667916	0.23377	0.177889	0.0994085
0.0263697	0.00659242	0.147643	0	0.062296	0.118929	0.139928	0.0932853
0.0113695	0	0.280112	0	0.0554954	0.181621	0.107796	0.107796
0	0	0.106597	0	0.0599887	0.0899831	0.320087	0.13245
0	0	0.261696	0	0.0249001	0.0747005	0.159027	0.11662
0.0272945	0.00909816	0.320128	0	0.0352108	0.281686	0.142189	0.128647
0.0237647	0.00792156	0.208779	0.0115988	0.0207653	0.249184	0.123099	0.100717
0.0160792	0	0.31567	0	0.0249001	0.124501	0.159477	0.0318953
0.0176957	0.0176957	0.32348	0.042193	0.0999812	0.0999812	0.147032	0.0941007
0	0	0.202425	0.0168688	0.0236452	0.124137	0.0933543	0.0933543
0.0237052	0	0.296507	0	0.0626668	0.149436	0.0961391	0.144209
0	0	0.197943	0	0.0288332	0.110527	0.0663077	0.0331539
0	0	0.164445	0.0411112	0	0.103287	0.059011	0.103269
0.043188	0	0.232868	0	0.0282235	0.0658548	0.0561192	0.0935321
0	0	0.351187	0.0438983	0.0610501	0.0814001	0.0365625	0.0731251
0.0394197	0.0131399	0.180657	0.0112911	0	0.232572	0.06607	0.06607
0.018547	0	0.206273	0	0.0196032	0.117619	0.160875	0.10725
0.018478	0	0.093355	0	0.00957648	0.124494	0.0722648	0.0541986
0	0	0.152583	0.0508611	0	0.108465	0.134343	0.0777777
0.0552798	0.0276399	0.104242	0	0	0.0996413	0.142462	0
0.0211582	0	0.174758	0	0.0748097	0.149619	0.0780586	0.0468352
0.0231881	0	0.135766	0	0.0750835	0.175195	0.0825001	0.0825001
0.0551876	0	0.154167	0	0.0382872	0.191436	0.0766072	0.0766072
0.0520199	0			0.0366902	0.220141	0.122701	0.0681674
0.0384184	0			0.065761	0.164402	0.0251367	0.100547
0.0797639	0			0.0393635	0.167295	0.10541	0.158114
0.0376245	0.0225747			0.0340331	0.174419	0.108164	0.108164
0.0184747	0.0184747			0.0311018	0.0933055	0.0791441	0.158288
0.0697934	0.00997049			0.0628303	0.251321	0.0595136	0.193419
				0.0229928	0.114964	0.0676023	0.0225341
				0.0296759	0.207731	0.0617798	0.0772247
				0.0936618	0.124882	0.0676023	0.0338011
				0.140563	0.0401608	0.0579448	0.0869172
				0.0525597	0.245278	0.0395721	0.0395721
				0.11873	0.184692	0.0705415	0.105812
				0.0382716	0.122469	0.0582752	0.0291376
				0.0568945	0.07315	0.101955	0.101955
				0.107222	0.227058	0.280735	0.153951
				0.0477585	0.206954	0.225901	0.0968148
				0.08377	0.220848	0.238419	0.0927184
				0.09915	0.207314	0.218637	0.121465
				0.0572524	0.318069	0.129301	0.103441
				0.0671833	0.172757	0.0877967	0.0658475
				0	0.207122	0.237392	0.0395653
				0.0737479	0.196661	0.111343	0.200417
				0.102935	0.231604	0.247979	0.300185
				0.0783254	0.190219	0.213459	0.343906
				0.0408859	0.122658	0.230736	0.259578
				0.196661	0.196661	0.149038	0.283172
						0.136267	0.125785
						0.071701	0.262904

## Sheet: Figure 6c
Fluorescent signal detected with motile kinesin	DDBEosk + Khc FL - Tm1 minus-end-directed (number of complexes)	DDBEosk + Khc FL - Tm1 plus-end-directed (number of complexes)	DDBEosk + Khc FL + Tm1 minus-end-directed (number of complexes)	DDBEosk + Khc FL + Tm1 plus-end-directed (number of complexes)	DDBEosk + Khc940 - Tm1 minus-end-directed (number of complexes)	DDBEosk + Khc940 - Tm1 plus-end-directed (number of complexes)	DDBEosk + Khc940 + Tm1 minus-end-directed (number of complexes)	DDBEosk + Khc940 + Tm1 plus-end-directed (number of complexes)
Kinesin only	1	28	9	9	2	343	3	151
Kinesin + osk 3'UTR 2+3	0	7	9	7	4	13	9	13
Kinesin + dynein	4	0	8	2	2	7	2	5
Kinesin + osk 3'UTR 2+3 + dynein	133	5	642	15	170	17	358	15

## Sheet: Figure 6d
Distance travelled by Khc FL toward minus end + DDBEosk - Tm1 (µm)	Distance travelled by Khc FL toward minus end + DDBEosk + Tm1 (µm)		Bin Center (µm)	1 - cumulative frequency distance travelled by Khc FL toward minus end + DDBEosk - Tm1 (µm)	1 - cumulative frequency distance travelled by Khc FL toward minus end + DDBEosk + Tm1 (µm)
6.43996	2.4675		0	0.822785	0.92216
0.63	2.31		2	0.341772	0.520254
0.559965	3.3075		4	0.183544	0.31533
1.68	2.835		6	0.0949367	0.199365
0.5775	2.1		8	0.0822785	0.133439
0.945	7.1925		10	0.056962	0.0778396
3.6225	6.405		12	0.0379747	0.050834
4.62	4.3575		14	0.0253165	0.0325655
0.525	3.6225		16	0.0126582	0.025417
1.89	4.0425		18	0.0126582	0.019857
6.3	6.405		20	0	0.0142971
1.1025	5.145		22	0	0.0103257
1.68	0.9975		24	0	0.00714853
3.78	4.2		26	0	0.00635425
0.6825	2.17003		28	0	0.00238284
3.2025	13.265		30	0	0.00158856
0.6825	8.99503		32	0	0.00079428
1.2075	4.16503		34	0	0
2.31	4.44496
12.39	4.44496
2.0475	3.11504
15.435	2.69503
3.7275	9.345
2.4675	8.78504
2.9925	2.80003
0.525	1.64504
3.255	0.874965
1.3125	0.874965
1.8375	3.95504
2.9925	1.92497
0.84	4.69003
2.73	1.64504
2.9925	9.83503
0.735	1.01503
3.36	2.65997
0.84	1.365
1.2075	2.94
2.31	2.02996
2.9925	1.85503
1.2075	2.06503
1.5225	5.74003
1.365	3.60496
1.68	1.22504
1.3125	0.735
2.6775	10.57
3.8325	4.33997
0.63	13.58
1.155	5.145
0.84	3.95504
1.3125	2.02996
2.3625	0.84
1.785	2.17003
4.1475	0.700035
1.1025	21.315
11.97	1.89
3.15	2.13496
14.6475	2.90503
2.7825	9.79997
0.5775	1.575
0.945	1.92497
1.1025	0.979965
4.725	2.13496
1.1025	4.62
1.2075	1.22504
14.91	1.33004
10.8675	3.11504
0.84	10.29
6.3525	4.06004
0.8925	2.76497
3.36	2.48503
1.2075	2.65997
1.7325	2.625
19.3725	9.66
1.5225	2.1
1.6275	4.27004
1.68	2.86997
1.6275	1.155
2.1	2.5725
1.9425	1.86375
1.89	7.17497
6.1425	2.44997
12.2325	9.58996
4.2525	1.81997
1.155	7.59497
9.87	16.345
0.9975	7.94503
1.575	10.115
2.6775	1.50497
5.9325	3.885
1.05	2.06503
1.89	7.38497
16.6425	1.96003
1.4175	1.26
0.700035	0.664965
1.85503	1.96003
5.3025	1.75004
0.5775	2.1
2.6775	1.39996
0.84	8.05003
5.1975	2.31
1.3125	3.99
1.26	5.80997
6.72	4.2
0.9975	12.46
9.66	9.27496
2.835	6.51
1.5225	7.48996
3.045	3.78
1.5225	12.495
8.7675	3.07997
19.11	0.910035
5.1975	14.7
1.3125	9.94003
0.8925	2.44997
1.1025	4.37503
1.785	5.88
1.1025	0.595035
3.8325	12.915
0.8925	2.1
0.5775	3.95504
0.63	3.22004
3.78	3.85004
5.46	2.86997
1.9425	3.255
2.94	13.09
1.26	2.06503
2.73	1.01503
3.15	0.945
7.6125	1.22504
3.5175	2.31
3.57	14
2.52	10.01
6.3525	2.835
4.725	3.18497
2.3625	12.04
1.365	0.769965
4.305	1.155
4.305	3.18497
1.7325	7.14
6.8775	3.91996
2.6775	1.01503
1.89	8.11997
1.89	5.25
1.365	6.16003
1.155	3.885
5.355	3.53504
6.3	3.64004
3.3075	16.625
2.6775	5.21504
9.7125	3.70996
3.675	15.295
2.205	1.01503
0.6825	10.15
1.5225	1.575
2.8875	7.455
1.995	9.83503
4.8825	1.39996
0.84	14.07
	8.64496
	2.02996
	0.769965
	2.44997
	2.02996
	0.525
	5.145
	3.74504
	2.52
	0.525
	5.80997
	2.06503
	4.75997
	2.835
	3.15
	2.205
	1.33004
	1.08496
	8.085
	5.25
	1.81997
	0.84
	1.155
	1.50497
	0.63
	4.06004
	1.22504
	7.21004
	1.43504
	5.11003
	5.38997
	12.67
	13.965
	0.63
	9.48497
	13.335
	3.675
	2.38003
	7.00003
	7.59497
	10.255
	5.32003
	4.48003
	1.39996
	4.095
	1.81997
	1.12003
	2.65997
	1.08496
	2.44997
	2.52
	1.365
	1.785
	5.32003
	1.68
	2.27503
	0.700035
	1.365
	4.935
	12.6
	2.205
	7.21004
	5.07496
	12.39
	2.17003
	4.305
	11.06
	6.93
	4.16503
	3.15
	0.874965
	1.155
	0.595035
	2.415
	1.33004
	17.885
	1.96003
	1.43504
	3.91996
	9.31003
	24.29
	1.39996
	2.31
	2.02996
	1.18996
	22.785
	2.23997
	9.94003
	5.74003
	4.12997
	2.94
	5.80997
	9.345
	17.675
	6.79003
	5.07496
	1.43504
	1.05
	4.37503
	1.60997
	5.88
	4.02496
	6.16003
	0.63
	1.18996
	2.48503
	3.18497
	1.12003
	5.91496
	1.08496
	2.69503
	4.06004
	2.48503
	5.46
	2.06503
	3.11504
	1.68
	0.84
	2.625
	3.74504
	1.575
	1.60997
	11.27
	3.36
	1.39996
	13.825
	24.535
	1.68
	2.17003
	1.18996
	2.44997
	1.85503
	1.12003
	0.63
	2.205
	0.664965
	2.06503
	8.19
	3.49996
	2.205
	0.805035
	12.355
	3.11504
	4.33997
	2.86997
	1.89
	3.49996
	3.15
	3.465
	2.44997
	6.75497
	3.43004
	10.57
	1.60997
	14.665
	3.91996
	32.62
	9.765
	2.76497
	7.48996
	3.70996
	2.59003
	0.63
	1.71497
	9.58996
	8.85496
	11.48
	1.64504
	6.26504
	2.38003
	7.77
	1.68
	1.39996
	11.235
	20.335
	2.625
	2.27503
	27.37
	3.99
	9.83503
	1.85503
	5.59997
	29.33
	2.44997
	1.96003
	1.785
	3.045
	27.93
	9.37997
	6.825
	10.605
	0.664965
	0.84
	1.01503
	1.05
	1.155
	10.29
	17.605
	6.26504
	0.595035
	5.00504
	2.90503
	1.47
	3.39497
	1.60997
	0.874965
	2.1
	1.85503
	2.34497
	2.80003
	34.055
	1.89
	6.96497
	12.145
	0.979965
	12.39
	2.73
	2.44997
	2.02996
	3.01003
	2.97497
	9.03
	4.305
	5.07496
	4.515
	0.910035
	14.07
	3.91996
	3.045
	3.64004
	4.69003
	7.14
	7.21004
	2.44997
	2.69503
	5.25
	2.17003
	14.385
	1.365
	0.700035
	1.01503
	0.525
	3.36
	4.96997
	23.205
	12.425
	8.11997
	12.11
	10.885
	1.12003
	5.38997
	3.39497
	1.26
	2.44997
	1.33004
	2.415
	2.97497
	7.98
	4.16503
	0.735
	3.465
	3.01003
	2.80003
	2.23997
	1.365
	5.28496
	3.36
	0.63
	1.05
	2.34497
	10.36
	4.58504
	1.85503
	15.155
	13.93
	0.805035
	0.595035
	1.29496
	1.92497
	0.979965
	0.945
	13.37
	11.41
	27.72
	2.835
	5.21504
	5.53003
	0.735
	3.64004
	4.54997
	1.18996
	1.12003
	2.55497
	3.74504
	2.34497
	3.57
	2.76497
	1.2075
	1.9425
	2.13496
	1.85503
	11.2
	4.27004
	0.595035
	2.31
	2.55497
	2.06503
	2.02996
	1.92497
	1.12003
	1.89
	2.44997
	5.84504
	4.41
	1.12003
	2.97497
	6.3
	1.39996
	3.70996
	3.32504
	3.60496
	3.64004
	2.52
	7.00003
	1.85503
	6.89504
	3.81496
	6.47504
	2.90503
	0.525
	4.69003
	2.90503
	5.74003
	20.02
	8.47003
	3.39497
	2.69503
	19.005
	5.67
	3.60496
	5.32003
	0.805035
	4.86496
	3.39497
	9.03
	3.18497
	5.565
	2.1
	1.75004
	4.48003
	7.875
	4.79504
	1.54004
	9.69496
	9.27496
	1.71497
	1.01503
	3.60496
	2.86997
	1.43504
	1.54004
	2.38003
	1.01503
	1.43504
	1.29496
	2.90503
	2.94
	2.90503
	3.43004
	9.31003
	4.90003
	12.355
	1.26
	3.045
	2.52
	1.22504
	7.035
	4.54997
	6.09
	6.68504
	7.69996
	6.54497
	7.48996
	3.18497
	4.54997
	5.28496
	3.28997
	3.15
	9.03
	6.72
	9.10004
	1.39996
	3.07997
	1.47
	2.205
	3.045
	2.34497
	10.745
	10.395
	2.27503
	6.405
	7.035
	12.915
	24.71
	20.51
	3.74504
	2.76497
	14.98
	2.27503
	9.765
	0.700035
	3.885
	1.50497
	22.995
	3.36
	5.17997
	3.32504
	27.125
	7.38497
	10.605
	4.86496
	3.60496
	0.945
	1.01503
	10.43
	2.94
	9.48497
	5.46
	8.085
	14.665
	2.97497
	13.02
	7.21004
	27.23
	9.16996
	8.505
	3.91996
	12.075
	7.69996
	4.58504
	3.22004
	3.74504
	10.325
	0.805035
	0.84
	5.88
	4.2
	1.155
	1.50497
	0.735
	2.76497
	2.835
	3.78
	2.1
	3.465
	25.06
	7.38497
	21.595
	10.605
	4.33997
	2.55497
	6.58003
	6.64996
	2.69503
	1.68
	6.85996
	4.79504
	6.16003
	1.8375
	2.8875
	4.90003
	5.355
	0.700035
	8.36504
	3.675
	0.874965
	7.06996
	5.63504
	5.67
	4.79504
	2.23997
	5.145
	2.17003
	3.22004
	1.575
	0.805035
	2.34497
	5.84504
	4.725
	5.91496
	7.14
	1.05
	5.985
	4.305
	1.08496
	4.06004
	1.155
	2.59003
	6.58003
	9.87
	2.73
	1.995
	2.44997
	5.985
	1.2075
	5.07496
	6.58003
	1.89
	2.1
	7.48996
	1.18996
	3.32504
	2.205
	2.23997
	2.52
	9.69496
	18.235
	2.97497
	4.79504
	0.979965
	0.910035
	1.96003
	2.90503
	3.22004
	16.555
	0.945
	1.365
	9.73004
	2.13496
	4.27004
	4.02496
	0.63
	1.785
	1.33004
	4.58504
	2.86997
	1.33004
	2.55497
	5.84504
	7.52503
	1.575
	6.3
	0.525
	13.545
	1.54004
	2.13496
	4.86496
	0.559965
	5.00504
	1.60997
	2.06503
	7.00003
	20.65
	4.44496
	9.135
	8.64496
	4.095
	1.18996
	13.545
	12.18
	3.28997
	11.97
	0.664965
	18.41
	12.915
	4.935
	8.05003
	5.84504
	2.59003
	0.63
	3.91996
	8.78504
	0.945
	3.53504
	2.27503
	2.73
	1.68
	4.83
	10.395
	1.92497
	9.62504
	1.81997
	8.61
	1.01503
	4.2
	1.39996
	3.675
	5.985
	12.985
	10.22
	8.95997
	6.3
	6.825
	0.805035
	8.32996
	4.095
	2.52
	16.555
	2.38003
	2.52
	4.27004
	19.565
	5.84504
	12.53
	3.01003
	6.615
	1.64504
	16.695
	2.415
	6.09
	0.945
	3.07997
	7.14
	3.74504
	6.72
	4.725
	2.31
	0.874965
	6.405
	17.045
	3.49996
	0.945
	2.59003
	1.71497
	0.805035
	2.02996
	4.65496
	3.53504
	3.675
	10.29
	7.14
	1.01503
	11.165
	2.48503
	10.29
	1.39996
	3.01003
	3.28997
	11.305
	2.86997
	2.59003
	0.84
	1.60997
	3.22004
	6.51
	5.145
	3.70996
	1.96003
	2.625
	2.835
	2.38003
	1.71497
	4.06004
	1.47
	1.75004
	7.94503
	8.925
	5.80997
	7.31503
	7.90996
	5.11003
	3.15
	1.71497
	5.985
	2.94
	2.55497
	1.995
	3.465
	1.89
	8.99503
	0.979965
	3.18497
	3.28997
	5.985
	3.36
	2.625
	2.97497
	1.155
	2.94
	2.34497
	12.18
	2.69503
	3.70996
	1.995
	10.885
	8.15503
	4.48003
	4.65496
	6.37003
	1.26
	3.22004
	10.22
	1.43504
	5.04
	1.47
	1.64504
	0.945
	7.35
	4.44496
	0.700035
	1.96003
	7.665
	1.50497
	2.13496
	3.85004
	5.145
	2.205
	6.85996
	3.64004
	5.985
	1.43504
	3.32504
	1.64504
	3.465
	3.70996
	5.145
	7.48996
	2.06503
	5.32003
	7.35
	5.42504
	1.39996
	1.85503
	0.559965
	1.01503
	1.26
	4.095
	1.75004
	0.84
	1.54004
	2.38003
	3.045
	1.60997
	2.59003
	1.81997
	3.675
	6.64996
	1.50497
	2.76497
	0.63
	3.675
	3.91996
	1.08496
	1.01503
	4.27004
	1.05
	1.08496
	1.18996
	1.81997
	2.80003
	1.29496
	0.874965
	10.5
	4.12997
	6.43996
	4.725
	9.0825
	5.9325
	6.6675
	5.04
	1.89
	13.3875
	10.395
	10.3425
	1.47
	6.615
	14.07
	3.9375
	2.3625
	1.5225
	11.7075
	5.46
	2.6775
	16.3275
	7.9275
	1.9425
	2.2575
	3.15
	1.155
	1.1025
	3.3075
	1.9425
	2.3625
	0.945
	4.515
	3.6225
	1.05
	9.24
	2.0475
	2.3625
	9.0825
	8.0325
	5.3025
	1.8375
	13.8075
	3.465
	17.115
	1.3125
	1.8375
	10.9725
	1.9425
	6.405
	6.72
	1.155
	1.6275
	2.2575
	10.71
	3.78
	3.0975
	1.7325
	3.0975
	5.5125
	5.0925
	2.415
	0.9975
	0.63
	2.835
	6.4575
	2.3625
	5.7225
	1.575
	1.7325
	1.26
	1.8375
	0.8925
	2.625
	0.945
	1.9425
	2.4675
	3.9375
	2.0475
	2.0475
	5.25
	4.5675
	4.7775
	2.3625
	3.2025
	4.62
	3.5175
	0.9975
	1.26
	2.3625
	1.365
	0.6825
	2.9925
	0.735
	1.785
	2.7825
	1.05
	2.9925
	7.14
	8.505
	4.8825
	2.8875
	4.095
	3.36
	1.995
	5.565
	1.365
	3.9375
	5.3025
	3.0975
	1.47
	7.35
	2.3625
	3.255
	1.785
	1.3125
	1.3125
	2.1525
	2.2575
	5.9325
	8.2425
	3.15
	3.8325
	2.625
	3.57
	3.0975
	1.8375
	9.87
	2.52
	2.5725
	2.625
	2.1525
	9.03
	3.9375
	2.2575
	2.3625
	1.365
	2.2575
	5.67
	3.57
	3.885
	3.2025
	4.41
	1.995
	4.3575
	3.3075
	1.1025
	5.7225
	4.095
	1.575
	8.3475
	2.835
	2.5725
	2.8875
	2.3625
	5.46
	0.735
	4.5675
	2.94
	0.84
	1.785
	10.9725
	5.67
	6.5625
	5.3025
	6.09
	1.2075
	7.245
	7.455
	5.04
	3.36
	6.09
	5.0925
	1.8375
	1.47
	0.84
	0.84
	3.885
	2.73
	4.2
	0.9975
	1.365
	11.34
	7.9275
	5.88
	2.4675
	9.3975
	0.945
	4.3575
	1.05
	1.1025
	3.99
	3.3075
	11.6025
	1.995
	2.94
	6.3
	2.73
	6.3525
	6.3
	2.9925
	2.3625
	6.195
	2.3625
	1.4175
	4.6725
	6.195
	2.31
	8.82
	2.8875
	3.0975
	2.52
	1.995
	1.68
	8.1375
	3.2025
	2.5725
	0.9975
	1.8375
	6.825
	3.78
	11.76
	8.0325
	6.4575
	4.095
	0.63
	4.62
	4.935
	3.7275
	2.205
	2.6775
	2.1
	6.6675
	1.4175
	1.995
	3.4125
	3.15
	1.155
	0.945
	11.1825
	2.3625
	6.5625
	4.8825
	1.7325
	4.515
	2.6775
	2.8875
	1.26
	2.73
	2.2575
	2.8875
	1.6275
	5.0925
	7.245
	4.2
	1.575
	0.6825
	4.9875
	3.465
	1.89
	1.3125
	0.9975
	0.945
	7.0875
	7.1925
	7.14
	1.2075
	9.135
	1.7325
	2.7825
	2.0475
	3.2025
	2.5725
	19.7925
	1.575
	2.31
	2.8875
	2.7825
	22.3125
	6.09
	7.98
	1.9425
	3.8325
	1.2075
	2.4675
	1.2075
	4.83
	5.9325
	1.995
	8.61
	2.4675
	5.8275
	3.4125
	2.8875
	16.7475
	13.965
	9.45
	3.5175
	1.785
	2.835
	1.8375
	1.8375
	0.6825
	2.0475
	1.995
	5.985
	1.26
	2.3625
	5.1975
	7.0875
	2.4675
	1.6275
	1.26
	4.62
	6.72
	2.625
	4.9875
	1.4175
	2.52
	3.7275
	0.945
	0.5775
	1.2075
	3.7275
	1.5225
	2.9925
	9.975
	4.9875
	5.1975
	10.4475
	2.415
	2.52
	1.155
	4.305
	1.785
	5.145
	4.2
	2.205
	1.3125
	1.89
	2.73
	2.6775
	3.57
	1.7325
	2.8875
	4.62
	2.7825
	1.6275
	3.15

## Sheet: Figure 6e
Khc FL-bound dynein velocity - Tm1 (µm/sec)	Khc FL-bound dynein velocity + Tm1 (µm/sec)	Per experiment median Khc FL-bound dynein velocity - Tm1 (µm/sec)	Per experiment median Khc FL-bound dynein velocity + Tm1 (µm/sec)
0.754042	0.679904	0.155626	0.269644
0.0896973	0.818437	0.1475	0.230893
0.0753406	0.482521	0.0801297	0.129654
0.677558	0.0912702
0.116505	0.133585
0.05082	0.0398412
0.0386232	0.467158
0.184555	0.568714
0.38745	0.427837
0.0911799	0.137361
0.090405	0.0274722
0.317967	0.202591
0.7749	0.0419244
0.239832	1.15735
0.0325458	0.896948
0.209869	0.0472626
0.0803313	1.15383
0.56826	1.19185
0.0995747	0.134497
0.0251842	0.393725
0.383576	0.263395
0.218263	0.417682
0.155626	0.0799428
0.0307377	0.0869736
0.086143	0.868043
0.086143	0.764925
0.351019	0.295945
0.217043	0.232537
0.0660114	0.588504
0.674696	0.795652
0.0671832	0.87234
0.615455	0.470673
0.24738	0.259489
0.0525	0.0424452
0.233363	0.549704
0.161569	0.0958272
0.274444	0.4557
0.825037	0.343207
0.534319	0.627304
0.0242813	0.0591108
0.181256	0.667275
0.487463	0.894083
0.150019	0.569625
0.069825	0.0506478
0.152119	0.569885
0.273788	0.598009
0.0875438	0.5208
0.0458062	1.12584
0.350044	0.565849
0.164062	0.839009
0.134269	0.0558558
0.343219	0.336307
0.691294	0.144652
0.0612938	0.269644
0.107231	0.5859
0.463181	0.124081
0.0694312	0.0635376
0.0454125	0.331359
0.160387	0.217043
0.196875	0.895125
0.0492187	0.0226548
0.0447562	0.208971
0.1722	0.350759
0.104081	0.350498
0.0602437	0.61845
0.147409	0.362086
0.333642	0.445154
0.410703	0.580952
0.072975	0.0532518
0.0723912	1.02715
0.0689041	0.98952
0.135651	0.0511686
0.290002	0.382267
0.0906255	0.186056
0.135075	0.273811
0.11508	0.0372372
0.103716	0.204544
0.261519	0.531607
1.06449	0.401927
0.132774	0.342166
0.0309278	0.0539028
0.14759	0.810755
0.176504	0.120956
0.452121	0.190873
0.307264	0.177723
0.10127	0.142829
0.0811482	0.737843
0.232644	0.193087
0.140988	0.114706
0.032109	0.196993
0.0861105	0.264176
0.73442	0.317037
0.171345	0.0593712
0.324301	0.224855
0.483386	0.121477
0.111652	0.382918
0.0891755	0.0430962
0.0370713	0.0165354
0.0707857	0.0291648
0.428064	0.537075
0.193452	0.530044
0.043512	0.771956
0.855246	0.140746
0.214914	0.302975
0.218148	0.180587
0.012936	0.448409
0.609021	0.844347
0.710451	0.120175
0.304437	0.311959
0.082593	0.0477834
0.0799848	0.116789
0.494689	0.348285
0.0389781	0.543715
0.0601335	0.536164
0.050715	0.0563766
0.0279657	0.0536424
0.0779562	0.052731
0.133888	0.1565
0.0821583	0.279019
0.106212	0.865439
0.0643356	0.352321
0.0178227	0.132674
0.132149	0.0928326
0.0462231	0.526399
0.0512946	0.363388
0.112153	0.365862
0.0204309	0.139835
0.164027	0.167437
0.1449	0.759457
0.126063	0.35805
0.120122	0.482261
0.0272412	0.243344
0.0273861	0.219778
0.178662	0.515201
0.0472374	0.089187
0.0801297	0.102337
0.638984	0.226157
0.192761	0.9114
0.0119921	0.758936
0.923536	0.9114
0.0898663	0.269644
0.205049	0.324849
0.0313866	0.0925722
0.020727	0.487599
0.0835002	0.48174
0.165964	0.65751
0.230662	0.153896
0.0685472	0.687196
0.0635134	1.02103
0.536977	0.394376
0.03568	0.29946
0.17766	0.222121
0.0481162	0.839009
0.0488565	0.418463
0.0423423	0.237094
0.124954	0.228631
0.0455994	0.192826
0.157969	0.335525
	0.714668
	0.359612
	0.0550746
	0.056637
	0.503483
	0.0443982
	0.9114
	0.69657
	0.108977
	0.102728
	0.163792
	0.0947856
	0.536554
	1.05462
	0.689279
	0.106504
	0.290997
	0.224204
	0.493067
	0.172775
	0.376148
	0.173557
	0.153506
	0.0470022
	0.0868434
	0.888485
	0.0893172
	0.924811
	0.242693
	0.132023
	0.208841
	0.440467
	0.811667
	0.0868434
	0.0720006
	0.253109
	0.268082
	0.173557
	0.685243
	0.231626
	0.307663
	0.131893
	0.980276
	0.347243
	0.0871038
	0.165094
	0.181108
	0.066402
	0.0380184
	0.479657
	0.176812
	0.241781
	0.301804
	0.706856
	0.20832
	0.470152
	0.0554652
	0.634725
	0.706075
	0.0658812
	0.282794
	0.116138
	0.699174
	0.0339822
	0.733807
	0.615976
	0.747999
	0.330448
	0.0667926
	0.46872
	0.1302
	0.171864
	0.088536
	0.89838
	0.0706986
	0.500228
	0.0972594
	0.148298
	1.0416
	0.0568974
	0.298158
	0.274071
	0.477443
	0.164182
	0.0623658
	0.756853
	0.268863
	0.0740838
	0.928326
	0.247771
	0.0919212
	0.332531
	0.0549444
	0.158453
	1.20279
	0.820781
	0.133455
	0.07812
	0.542543
	0.332791
	0.72912
	0.258187
	0.763883
	0.0571578
	0.070308
	0.401927
	0.4557
	0.462991
	0.120175
	0.0399714
	0.401016
	0.255973
	0.616237
	0.290216
	0.187358
	0.340864
	0.0906192
	0.189441
	0.723391
	0.870647
	0.0714798
	0.146084
	0.952804
	0.41664
	0.173557
	0.207409
	0.59267
	0.100775
	0.0815052
	0.22134
	0.239828
	0.405964
	0.1302
	0.111581
	0.154808
	0.176681
	0.480047
	0.0906192
	0.542543
	0.4557
	0.29946
	0.181629
	1.05345
	0.194519
	0.410651
	0.0576786
	0.109368
	0.229803
	0.85932
	0.144652
	0.330578
	0.163531
	0.546059
	0.171083
	0.779377
	0.189441
	0.197904
	0.844738
	1.02858
	0.415859
	0.459997
	0.507129
	0.106504
	0.138663
	0.266259
	0.457523
	0.584989
	0.470673
	0.358571
	0.681076
	0.489943
	0.271727
	0.0437472
	0.908536
	0.0511686
	0.295945
	0.3255
	0.0693966
	1.06022
	0.0251286
	0.0503874
	0.161448
	0.482782
	0.124862
	0.0307272
	0.108847
	0.108977
	0.12356
	0.646183
	0.189441
	0.159755
	0.145564
	0.142048
	0.37758
	0.7812
	0.116138
	0.316386
	0.310397
	1.16529
	0.0851508
	0.0738234
	0.240089
	0.497104
	0.120305
	0.193217
	0.191524
	0.31248
	0.627304
	0.87234
	0.651
	0.546059
	0.413515
	0.185014
	0.105071
	0.0662718
	0.658421
	0.8463
	0.178765
	0.0131502
	0.0973896
	0.165224
	0.0651
	0.258317
	0.510254
	0.329276
	0.161188
	0.508171
	0.317037
	0.116789
	0.0220038
	0.87234
	0.421588
	0.339562
	0.0623658
	0.250635
	0.149079
	0.298939
	0.0389298
	0.133585
	0.200248
	0.094395
	0.059241
	0.694357
	0.113404
	0.571708
	0.382007
	0.328364
	0.092442
	0.964131
	0.143611
	0.164312
	0.308053
	0.5208
	0.0217434
	0.0402318
	0.691102
	0.263525
	0.207539
	0.0294252
	0.18228
	0.157151
	0.622096
	0.315605
	0.555563
	0.267301
	0.517415
	0.7812
	0.167437
	0.0193998
	0.212747
	0.700736
	0.035805
	0.143741
	0.0738234
	0.863617
	0.076818
	0.0921816
	0.185275
	0.596707
	0.158453
	0.5859
	0.0557256
	0.284878
	0.193477
	0.310136
	0.843436
	0.428618
	0.27342
	0.014973
	0.208971
	0.152594
	0.173557
	0.0932232
	0.316646
	0.281362
	0.0825468
	0.139054
	0.142569
	0.209492
	0.273811
	0.34503
	0.0936138
	0.378231
	0.055335
	0.0333312
	0.0251286
	0.640193
	0.160667
	0.298418
	0.0055986
	0.0675738
	0.276154
	0.0337081
	0.301307
	0.0699993
	0.914769
	0.150976
	0.166603
	0.977795
	0.584275
	0.532098
	0.5166
	0.0674163
	1.1741
	0.253521
	0.97857
	0.138061
	0.0466232
	0.2552
	0.0745196
	0.250809
	0.487283
	0.0612171
	0.761598
	0.0919548
	0.118172
	0.236732
	0.594348
	0.131604
	1.02326
	0.654403
	0.371306
	0.598352
	0.659311
	0.555345
	0.618499
	0.128375
	0.2583
	0.538168
	0.254296
	0.0626378
	0.194371
	0.210514
	0.533906
	1.26761
	1.05477
	0.22033
	0.158338
	0.814678
	0.31151
	0.473593
	0.250938
	0.249647
	0.132379
	0.140515
	0.63051
	0.90405
	0.306215
	0.275089
	0.227562
	0.695473
	0.407081
	0.244739
	0.127729
	1.16235
	0.102674
	0.259591
	0.329203
	0.252488
	0.822298
	0.473593
	1.04999
	0.226529
	0.511047
	0.621857
	0.39804
	0.3571
	0.207544
	0.0804605
	0.30996
	0.113781
	0.172157
	0.2583
	0.339019
	0.219942
	0.510788
	0.480696
	0.142065
	0.0711617
	0.239832
	0.101383
	0.112877
	0.127471
	0.224592
	0.121918
	0.155238
	0.463778
	0.418704
	0.254426
	0.175773
	0.10332
	0.462486
	0.370273
	0.912445
	0.0649625
	0.546175
	0.766893
	0.92678
	0.756948
	0.514921
	0.0709034
	0.221751
	0.0162729
	0.17022
	1.01279
	0.374148
	0.945895
	0.201474
	0.0977665
	0.557928
	0.274444
	0.70658
	0.345476
	0.1307
	0.256363
	0.341085
	0.344443
	0.825139
	0.50743
	0.52874
	0.15046
	0.552762
	0.255717
	0.156401
	0.18236
	0.943312
	0.368982
	0.473593
	0.264499
	0.169445
	0.192563
	0.012915
	0.296787
	0.121143
	0.75217
	1.03901
	0.153043
	0.277672
	0.55909
	0.125146
	0.0842058
	0.125146
	0.322875
	0.355162
	0.229629
	0.0719366
	0.146198
	1.0332
	0.565031
	0.0559219
	0.90405
	0.411601
	0.198633
	0.411601
	0.366528
	0.0504976
	0.395328
	0.305827
	0.747262
	0.478242
	0.12915
	0.791044
	0.0734864
	0.69896
	0.64575
	0.17474
	0.346122
	1.1351
	0.28116
	0.0924714
	0.537651
	0.215293
	0.220847
	0.0565677
	0.0588924
	0.5166
	0.170478
	0.503039
	0.038745
	0.068062
	0.141936
	0.306731
	0.301307
	0.690178
	0.228466
	0.286049
	1.16555
	0.036456
	0.7812
	0.142178
	0.368857
	0.537726
	0.190743
	0.595144
	0.29295
	0.546449
	0.243083
	0.737843
	0.615065
	0.121477
	0.178114
	0.197123
	0.771956
	0.29946
	0.655166
	0.0092442
	0.0412734
	1.13118
	0.305449
	0.836014
	0.534731
	0.11718
	0.135538
	0.107545
	0.655948
	0.427056
	0.159625
	0.279539
	0.724823
	0.437342
	0.308314
	0.558037
	0.0610638
	0.229022
	0.318209
	0.305449
	0.861794
	0.122518
	0.564157
	0.127466
	0.156761
	0.347243
	0.311048
	0.0945252
	0.75516
	0.0790314
	0.5859
	0.0851508
	0.0739536
	0.0916608
	0.230975
	0.609987
	0.0916608
	0.845519
	0.762581
	0.496192
	0.187228
	0.749822
	0.169
	0.0571578
	0.72912
	0.154938
	0.127122
	0.0957432
	0.0344442
	0.37947
	0.35028
	0.0861105
	0.903139
	0.0243737
	0.446023
	0.133106
	0.265921
	0.192362
	0.147118
	0.0494771
	0.136901
	0.163172
	0.949989
	0.0872781
	0.160983
	0.547312
	0.618682
	0.043639
	0.708879
	0.341523
	0.126539
	0.277305
	0.21119
	0.090635
	0.937145
	0.160545
	0.443104
	0.365313
	0.570519
	0.336415
	0.0442229
	0.173243
	0.915544
	0.651229
	0.0147409
	0.0687424
	0.419314
	0.0312333
	0.124058
	0.15281
	0.385308
	0.140404
	0.834688
	0.168864
	0.11676
	0.246364
	0.26344
	0.198638
	0.19747
	0.0983703
	0.473462
	0.982681
	0.528485
	0.184919
	0.178351
	0.0798346
	0.337436
	0.43172
	0.0605692
	0.0499149
	0.0957432
	0.124787
	0.725226
	0.664948
	0.981806
	0.14595
	0.373048
	0.0718074
	0.936123
	0.117928
	0.468791
	0.110484
	0.140404
	0.0375091
	0.827099
	0.0191194
	0.0534177
	0.471564
	0.513688
	0.0320785
	0.0330855
	0.186573
	0.0382641
	0.532964
	0.104435
	0.117669
	0.0179813
	0.0409972
	0.335602
	0.02877
	0.241093
	0.474705
	0.114217
	0.435002
	0.14385
	0.396738
	0.0338048
	0.361783
	0.726874
	0.0589785
	0.297528
	0.131124
	0.137151
	0.39396
	0.046746
	0.435414
	0.084231
	0.930951
	0.537873
	0.158613
	0.9408
	0.724122
	0.399252
	0.10584
	0.965937
	0.933156
	0.251076
	0.271362
	0.071736
	0.383817
	0.2646
	0.24696
	0.777924
	0.10143
	0.195951
	0.975492
	0.036162
	0.229908
	0.117159
	0.28812
	0.091728
	0.423654
	0.130683
	0.2205
	0.066297
	0.465549
	0.431739
	0.441
	0.472164
	0.6174
	0.898758
	0.510237
	0.078351
	0.907872
	0.529935
	0.108927
	0.556542
	0.168021
	0.473634
	0.294
	0.260631
	0.489951
	0.168021
	0.248724
	0.416451
	0.230893
	0.129166
	0.0760399
	0.20506
	0.0782292
	0.150766
	0.0259791
	0.0712236
	0.131355
	0.340501
	0.247677
	0.23819
	0.325614
	0.0601314
	0.336853
	0.090489
	0.330869
	0.2919
	0.364875
	0.284165
	0.113987
	0.810898
	0.748723
	0.0627585
	0.216825
	0.081732
	0.361179
	0.200802
	0.024549
	0.068796
	0.070413
	0.064239
	0.247548
	0.018816
	0.181545
	0.320313
	0.297969
	0.047187
	0.304437
	0.162288
	0.080409
	0.4998
	0.571536
	0.341481
	0.016464
	0.351183
	0.3675
	0.008085
	0.280623
	0.033957
	0.019845
	0.025578
	0.024255
	0.574623
	0.055713
	0.068355
	0.488187
	0.1911
	0.078792
	0.037779
	0.170373
	0.280182
	0.059829
	0.091434
	0.38808
	0.147441
	0.306201
	0.160818
	0.118629
	0.187572
	0.077616
	0.105693
	0.085113
	0.033222
	0.024402
	0.194775
	0.03087
	0.361326
	0.11025
	0.321195
	0.095256
	0.29106
	0.0294
	0.01029
	0.147
	0.028812
	0.441
	0.348096
	0.032487
	0.11025
	0.063798
	0.1764
	0.084378
	0.11907
	0.136122
	0.027636
	0.01764
	0.051891
	0.306201
	0.09555
	0.079674
	0.082173
	0.196686
	0.2058
	0.127155
	0.031311
	0.760872
	0.050274
	0.090111
	0.023079
	0.2205
	0.272979
	0.008967
	0.039396
	0.057183
	0.078057
	0.268716
	0.098049
	0.116424
	0.025725
	0.153615
	0.369558
	0.40425
	0.272979
	0.392049
	0.372351
	0.027342
	0.09555
	0.029988
	0.024402
	0.137739
	0.686049
	0.09996
	0.6615
	0.015435
	0.032634
	0.408366
	0.0735
	0.027636
	0.451437
	0.205065
	0.49098
	0.419979
	0.223587
	0.049392
	0.03675
	0.031605
	0.114366
	0.109221
	0.02646
	0.135975
	0.048951
	0.133917
	0.105399
	0.042042
	0.371763
	0.094521
	0.046011
	0.143619
	0.063504
	0.062034
	0.021315
	0.057918
	0.058212
	0.033663
	0.190659
	0.544782
	0.171549
	0.400575
	0.154938
	0.245049
	0.064092
	0.566979
	0.5145
	0.577563
	0.389109
	0.029106
	0.098049
	0.12789
	0.433209
	0.065268
	0.312375
	0.426741
	0.610638
	0.067326
	0.069384
	0.588
	0.012348
	0.520086
	0.497007
	0.271362
	1.34402
	0.034692
	0.594174
	0.049539
	0.114366
	0.147
	0.06027
	0.205212
	0.545958
	0.076293
	0.068061
	0.424683
	0.191247
	0.056595
	0.060123
	0.460551
	0.160377
	0.094521
	0.022932
	0.108927
	0.147
	0.047334
	0.078498
	0.4998
	0.22344
	0.191394
	0.074382
	0.107604
	0.40425
	0.534492
	0.492891
	0.019992
	0.137739
	0.118188
	0.101724
	0.062034
	0.327222
	0.294
	0.178899
	0.218442
	0.578151
	0.588
	0.2793
	0.0588
	0.529935
	0.597849
	0.063798
	0.05586
	0.019698
	0.034986
	0.2205
	0.145089
	0.077028
	0.231819
	0.194334
	0.015288
	0.51744
	0.029547
	0.144942
	0.055566
	0.062475
	0.154791
	0.128772
	0.165375
	0.69825
	0.134505
	0.464226
	0.170226
	0.007203
	0.406602
	0.315021
	0.068355
	0.070119
	0.606375
	0.903021
	0.187425
	0.19257
	0.168021
	0.078792
	0.053067
	0.066885
	0.325458
	0.042042
	0.206976
	0.039837
	0.1764
	0.065856
	0.033663
	0.334572
	0.294
	0.054096
	0.147
	0.377937
	0.404985
	0.447468
	0.285621
	0.03381
	0.16611
	0.255339
	0.106722
	0.028371
	0.172431
	0.277095
	0.119364
	0.339276
	0.101136
	0.025137
	0.031605
	0.117012
	0.034104
	0.116424
	0.04851
	0.087906
	0.198891
	0.265776
	0.064974
	0.082467
	0.572859
	0.042924
	0.73059
	0.767634
	0.02352
	0.064533
	0.224616
	0.089817
	0.117012
	0.144648
	0.229026
	0.028224
	0.7938
	0.428799
	0.114366
	0.042483
	0.064386
	0.124068
	0.149646
	0.1764
	0.389109
	0.054978
	0.86289
	0.313992
	0.099078
	0.320754
	0.170226
	0.418068
	0.131271
	0.118335
	0.1323
	0.045864
	0.298263
	0.091287
	0.070266
	0.241521
	0.948885
	0.063651
	0.046746
	0.06615
	0.130536
	0.177429
	0.321489
	0.008967
	0.020433
	0.134799
	0.860979
	0.058065
	0.0735
	0.619017
	0.024843
	0.306201
	0.182427
	0.066444
	0.62475
	0.172284
	0.134799
	0.084231
	0.099519
	0.064974
	0.119952
	0.3675
