# Supplementary material for: Tropomyosin 1-I/C coordinates kinesin-1 and dynein motors during oskar mRNA transport
Source: Nat Struct Mol Biol. 2024 Jan 31;31(3):476–88. doi: 10.1038/s41594-024-01212-x (PMC10948360; doi:10.1038/s41594-024-01212-x)
Supplement: Supplementary file 12 — Numerical source data file with lists of motor protein movements used for statistical analysis. [file 41594_2024_1212_MOESM12_ESM.xlsx]

## Sheet: Extended Data Figure 7b
DDBEosk velocity - Tm1 (µm/sec)	DDBEosk velocity + Tm1 (µm/sec)	Tm1-bound DDBEosk velocity (µm/sec)	Per experiment median DDBEosk velocity - Tm1 (µm/sec)	Per experiment median DDBEosk velocity + Tm1 (µm/sec)	Per experiment median Tm1-bound DDBEosk velocity (µm/sec)
0.33663	0.329729	0.278829	0.143485	0.17364	0.178979
0.095697	0.411711	0.156006	0.133637	0.155304	0.148355
0.079233	0.103604	0.0828828
0.054096	0.221772	0.613062
0.316638	0.426726	0.033033
0.060417	0.166216	0.132282
0.31311	0.0935435	0.205856
0.107163	0.0609609	0.145345
0.258426	0.761411	0.178979
0.466725	0.727627	0.836486
0.392049	0.553153	0.424024
0.68355	1.12177	0.0429429
0.059094	0.122372	0.288738
0.087465	0.0618618	0.513063
0.3528	0.0336336	1.23123
1.029	0.787387	0.129129
0.882	0.315765	0.0528528
0.983136	0.355405	0.0190691
0.090258	0.256907	0.139489
0.416451	0.0471471	0.811561
0.075117	0.538588	0.115766
0.187131	0.034985	1.04174
0.128625	0.0331832	0.141591
0.037485	0.825825	0.116366
0.547428	0.444744	0.11051
0.041748	0.036036	0.205856
0.507885	0.0213213	0.0647146
0.717654	0.787236	0.0819819
0.82908	0.102102	0.127027
0.081291	0.0519519	0.0304804
0.081144	0.125676	0.225225
0.050274	0.212162	0.397898
0.336042	0.32027	0.493993
0.426741	0.0603603	0.967567
0.084819	0.121772	1.02597
0.592557	0.384684	0.143694
0.1764	0.629128	0.117117
0.083643	0.44069	0.0678678
0.66885	0.564864	0.210961
0.735	0.13018	0.0806305
0.24843	0.0966966	0.70075
0.076587	0.052102	0.719519
0.229614	0.0447447	0.966966
0.024843	0.142492	0.45045
0.721623	0.0926426	0.362012
0.128625	0.6006	0.321321
0.102459	0.591291	0.466516
0.054243	0.174324	0.53048
0.083202	0.182883	0.294294
0.048951	0.00795795	0.0774774
0.798651	0.467117	0.106757
0.13377	0.0466966	0.557957
0.107751	0.0588588	0.0978978
0.126861	0.406156	0.525525
0.131271	0.0920419	0.0680179
0.10143	0.0142642	0.15015
0.939771	0.0249249	0.158408
0.247695	0.495495	0.979579
0.492156	0.468168	0.167868
0.038514	0.762312	0.125244
0.032634	0.857356	0.5964
0.027195	0.643543	1.1928
0.10731	0.312913	0.146118
0.39543	0.197748	0.251979
0.4704	0.593843	0.0729099
0.79968	0.213063	0.4473
0.012495	0.77042	0.0413007
0.010437	0.688137	0.0921438
0.502887	1.04384	0.0785757
0.681492	0.0489489	0.87805
0.25578	0.104204	0.184139
0.034839	0.0468468	0.0560616
0.07497	0.0996996	0.19383
0.716625	0.117868	0.94425
0.726033	0.0980479	0.168483
0.303408	0.502102	0.167887
0.699279	0.156156	0.0530796
0.541254	0.773573	0.642323
0.060417	0.996395	0.263758
0.164052	0.016066	0.662302
0.103929	0.589939	0.126139
0.042483	0.118619	0.106159
0.467313	0.12042	0.344719
0.539049	0.169369	0.251084
0.814821	0.121621	0.121069
0.247254	0.062012	0.0632184
0.197568	0.0548047	0.160133
0.21756	0.106006	0.119578
0.670026	0.0475976	0.683325
0.601965	0.0704204	0.231403
0.068061	0.0246246	0.131208
0.120834	0.867567	0.0544215
0.0588	0.758258	0.912194
0.069678	0.112162	0.601469
0.012348	0.105255	0.48875
0.177576	0.125826	0.0776811
0.009702	0.525525	0.33801
0.077175	0.0121622	0.13091
0.067032	0.572372	0.166246
0.511707	0.0333333	0.0882672
0.7056	0.0222222	0.773084
0.311346	0.208258	0.0474138
0.0735	0.142943	0.154617
0.076146	0.0696696	1.0437
0.016023	0.0108108	0.251979
0.224322	0.525525	0.40257
0.6468	0.192793	0.456991
0.208005	0.163363	0.116596
0.094962	0.523423	0.333686
0.13671	0.188438	0.101686
0.3675	0.115615	0.340395
0.607551	0.441291	0.156257
0.278859	0.54054	0.067095
0.223734	0.297898	1.12317
0.872151	0.135135	0.0395115
0.826875	0.0253754	0.113763
0.199479	0.809308	0.20546
0.0735	1.23874	0.71568
0.439089	0.604504	0.37767
0.057918	0.165165	0.214672
0.0735	0.827627	0.0652901
0.060711	0.0451952	0.105708
0.539049	0.337237	0.137538
0.015435	0.0527026	0.0626252
0.2646	0.0321321	0.0103635
0.101283	0.549849	0.200904
0.065856	0.45045	0.419426
0.105252	0.67072	0.458215
0.045423	0.137688	0.0479682
0.11466	0.0503002	0.194982
0.569625	0.239039	0.215709
0.588	0.0522522	0.235103
0.112161	0.849399	1.01784
0.091434	0.147748	0.128507
1.06193	0.563363	0.0230958
0.226086	0	0.0587758
0.48804	0.0238738	0.0577395
0.52185	0.118168	0.0448592
0.198891	0.125976	0.0515214
0.457317	0.10015	0.0648459
0.064386	0.0256757	0.243246
0.34398	0.533033	0.0265009
0.063798	0.0325826	0.0167296
0.040719	0.093093	0.617961
0.552279	0.143994	0.41454
0.463785	0.472372	0.0493007
0.12642	0.614564	0.270783
0.327369	0.121922	0.0974169
0.1029	0.44069	0.125842
0.283857	0	0.154416
0.283563	0.0974474	0.101414
0.154791	0.442492	0.0263529
0.100548	0.277177	0.407878
0.026166	0.108558	0.270043
0.316932	0.213663	0.0673627
0.089376	0.475525	0.0669186
0.125979	0.641891	0.140944
0.108486	0.708708	0.126287
0.109221	1.07613	0.161923
0.084378	0.835435	0.0436863
0.596673	1.05856	0.776364
0.065268	0.857356	0.0366786
0.018522	0.225225	0.0390642
0.075999	0.0459459	0.0618765
0.007203	0.116066	0.311768
0.5733	0.0836336	0.269126
0.2205	0.0103604	1.648
0.053655	0.78078	0.196663
0.05145	0.205405	0.310575
0.081732	0.0935435	0.296113
0.066297	0.0578077	0.100344
1.25435	0.00975975	0.153275
0.074529	0.767867	0.210082
0.023226	0.47042	0.291043
0.724857	0.815164	0.116447
0.099519	0.116366	0.90951
0.039543	0.871771	0.378118
0.539049	0.80075	0.0126735
0.001617	0.992942	0.730888
0.003381	0.0554053	0.0711207
0.001617	0.536936	0.166246
0.06321	0.11051	0.022365
0.409542	0.0845344	0.0292236
0.138327	0.0268769	0.110632
0.078645	0.179579	0.64605
0.048657	0.10015	0.143136
0.028077	0.675675	0.4224
0.242109	0.117267	0.0325038
0.411159	0.116817	0.675274
0.9114	0.525525	0.661706
0.856863	0.429729	0.6295
0.075558	0.0364864	0.2402
0.085554	0.0138138	0.0608328
0.574623	0.6006	0.105712
0.536109	0.291441	0.143434
0.059976	0.201952	0.0675423
0.416304	0.548048	0.322802
0.093198	0.05	0.741474
0.168462	0.382883	0.3562
0.105252	0.105405	0.0629202
0.057771	0.29024	0.392431
0.767193	0.183934	0.0098406
1.00798	0.473573	0.681536
0.043365	0.0133633	0.105265
0.0294	0.469069	0.4224
0.063798	0.75075	1.24707
0.540813	1.5015	1.23112
0.753963	1.01186	0.104817
0.013377	0.073123	0.180858
0.129948	1.07162	0.0738045
0.441	1.12928	0.807675
0.083055	0.138288
1.04737	0.76081
0.80115	0.160961
0.039837	0.375375
0.079086	0.188588
0.510972	0.646846
0.043365	0.0809308
0.105252	0.09009
0.107898	0.481831
0.030723	0.054054
0.075558	0.553753
0.863625	0.0033033
0.249018	0.391441
0.268128	0.0852852
0.037338	0.764714
0.125097	0.84084
0.517293	1.1512
0.095844	0.9009
0.002646	0.165916
0.7203	1.01096
0.648564	0.859459
0.147	0.429729
0.10437	0.0734233
0.112602	0.70075
0.306642	0.391892
0.173607	0.119219
0.224469	0.719068
0.037338	0.0406907
0.117012	0.0337838
0.099078	0.106907
0.08379	0.161261
0.02793	0.11997
0.076587	0.119519
0.6468	0.134985
0.76293	0.133784
0.08379	0.323723
0.044688	0.898948
0.524937	0.198799
0.610638	0.0196697
0.697662	0.123874
0.147	0.512912
0.278565	0.117117
0.912576	0.0357357
0.180663	0.0939939
0.294	0.242042
0.143178	0.556756
0.071736	0.0412913
0.042189	0.786035
0.093639	0.195645
0.104517	0.303603
0.021903	0.0804804
0.736617	1.02958
0.864066	0.734984
0.036897	0.0714714
0.044835	0.20991
0.0735	0.0033033
0.249606	1.32132
0.251664	0.046997
0.141855	0.434534
0.08526	0.75075
0.024549	0.266967
0.02205	0.626726
0.2205	0.641591
0.07056	0.513663
0.015729	0.669369
0.599172	0.0127627
0.024255	0.0129129
0.384111	0.617267
0.080115	0.065015
0.7938	0.0642642
0.6909	0.145946
0.095697	0.140691
0.965937	0.113664
0.108927	0.505105
0.564186	0.888438
0.272391	0.0972972
0.730296	0.546996
0.109074	0.0291291
0.090405	0.114414
0.510237	0.234835
0.029547	0.283333
0.046011	0.0066066
0.059241	0.193093
0.626367	0.0453453
0.059094	0.0852852
0.056889	0.0713213
0.959028	0.849248
0.614754	0.954954
0.052185	0.0663663
0.17934	0.124024
0.07791	0.133784
0.40425	0.868768
0.049098	0.355555
0.6321	0.75075
0.600201	0.352552
0.061299	0.591591
0.239904	1.07838
0.95844	1.36637
0.710451	0.0588588
0.128625	0.075075
0.107457	1.06306
0.112308	0.0244744
0.43071	0.112613
0.728973	0.109309
0.175224	0.193093
0.962115	0.103604
0.037779	0.0054054
0.11907	0.888438
0.744261	0.419219
0.052479	0.00975975
0.136122	0.0771771
0.410865	0.0406907
0.533757	0.23979
0.735	0.408708
0.022344	0.0978978
0.87465	0.0962462
0.129507	0.705705
0.103047	0.0534534
0.6174	0.0042042
0.031899	0.713213
0.56301	0.0806305
0.075264	0.186186
0.08379	0.323723
0.088641	0.0342342
0.037632	0.358708
0.023814	0.0354354
0.069825	0.281531
0.036603	0.45045
0.173019	0.202402
0.079527	0.0563063
0.762636	0.0819819
0.105546	0.0953453
0.063945	0.0984984
0.15729	0.0507507
0.03969	0.125075
0.067032	0.154054
0.059682	0.267717
0.534492	0.00405405
0.481719	0.0729729
0.207123	0.0522522
0.076734	1.24625
0.103488	0.443693
0.432033	0.23003
0.673701	0.0405405
0.131712	0.0229729
0.254751	0.109309
0.0294	0.68108
0.947268	0.253303
0.147	0.285585
0.190218	0.0651651
0.083496	0.204354
0.060564	0.736786
0.098049	1.02688
0.012936	1.08603
0.429681	0.0414414
0.089376	0.006006
0.027636	0.0531531
0.094962	0.0244744
0.673701	0.175225
0.157143	0.820119
0.691488	0.11982
0.058359	0.534084
0.032487	0.0318318
0.031458	0.0864864
0.0819504	0.6006
0.114458	0.0770269
0.12731	0.126727
0.0920808	0.757056
0.634133	0.359759
0.0883008	0.0271772
1.14474	0.137537
0.457985	0.903903
0.578491	0.50045
0.0043848	0.46096
0.0822528	0.467117
0.110678	0.238738
0.57577	0.645645
0.085428	0.203003
0.827215	0.0864864
0.378	0.0515014
0.0235872	0.114114
0.0810432	0.0936936
0.0625968	0.768167
0.354413	0.13048
0.0346248	0.065015
0.0509544	0.0905404
0.610092	0.278078
0.40703	0.129279
0.103118	0.113213
0.534341	0.482582
0.0376488	0.0247748
0.0730296	0.0801801
0.99535	0.120871
0.0644112	0.00555555
0.082404	0.0623122
0.0497448	0.0557057
0.0784728	0.256756
0.8694	0.579129
0.0322056	0.0106607
0.118238	1.18669
0.0625968	0.0076041
0.006048	0.99405
0.001512	0.790826
0.349726	0.083496
0.669665	0.383336
0.859874	0.153871
0.214855	0.207845
0.0184464	0.0314601
0.741636	0.136427
0.744358	0.0520359
0.57955	1.13003
0.127764	0.90951
0.129881	0.188015
0.318276	0.127182
0.02646	0.308786
0.206388	0.442976
0.583783	1.0519
0.189	0.0453264
0.324173	0.0444318
0.425023	0.426724
0.0724248	0.393624
0.19777	0.0360822
0.329918	0.942014
0.08316	0.40585
0.790322	1.05473
0.716839	1.59418
0.76613	0.0967659
0.138197	0.0438354
0.0146664	0.1491
0.108259	0.0562107
0.148781	0.0843906
0.0576072	0.493223
0.467359	0.433732
0.782309	0.0994497
0.0096768	0.468621
0.350482	0.047712
1.22638	1.06353
0.0229824	0.0351876
0.0867888	0.144776
0.148176	0.157599
0.0427896	0.243928
0.364241	0.120473
0.472802	0.0545706
0.0282744	1.1928
0.498506	1.12451
0.649404	1.1928
0.0585144	0.197408
0.553694	0.972728
1.03179	1.23306
0.0734832	0.0529305
0.391759	0.0530796
0.06426	0.0967659
0.172822	1.01179
0.0049896	0.642919
0.0530712	0.440143
0.306634	0.0797685
0.145001	0.106457
0.71064	0.0577017
0.97781	0.477716
1.12825	0.0375732
0.225893	0.0289254
0.0343224	0.0784266
0.300283	0.671845
0.267775	0.19711
0.0579096	0.0691824
0.93744	0.136874
0.0671328	0.092442
0.143942	0.3562
0.135626	0.135681
0.237989	0.336519
0.021924	0.615038
0.88074	0.0333984
0.80015	0.239156
0.135022	0.159388
0.0049896	0.369917
0.218333	0.576122
0.145001	0.64605
0.19777	0.501125
1.28263	0.681536
0.08694	0.380205
0.109469	0.0451773
0.799848	0.0453264
0.186581	0.0563598
0.0600264	0.239306
0.129276	0.192935
0.188698	0.0375732
0.143791	0.434925
0.136836	0.312066
1.00019	0.116447
0.0560952	0.822436
0.157248	0.340246
0.0379512	0.218282
0.391306	0.338904
0.0427896	0.0793212
0.676015	0.0430899
0.0804384	0.0339948
0.0760536	0.0548688
0.77112	0.122411
0.756	0.034293
0.160272	0.857325
0.0131544	0.148205
0.152863	0.0314601
0.0222264	1.3419
0.7371	0.0348894
0.44604	0.242586
0.0987336	0.349639
1.11465	0.0384678
0.2079	0.0150591
0.0987336	0.76041
0.120506	0.0545706
0.100699	0.168483
0.189302	0.550477
0.853222	0.109141
0.106898	0.410025
0.083916	0.0132699
0.083916	0.258688
0.88195	0.84495
0.168134	0.0788739
0.0792288	0.073059
0.110678	0.47712
0.550368	0.0512904
0.2457	0.214108
0.961178	0.171167
0.78624	0.883119
0.658778	0.331598
0.80635	0.396457
0.0432432	0.778153
1.04464	0.0331002
0.467359	0.235727
0.644566	0.0214704
0.339898	0.561361
0.1134	1.1928
0.072576	0.0243033
0.369986	0.0454755
0.0858816	0.128971
0.426082	0.0474138
0.595123	0.0590436
0.0928368	0.134786
0.119297	0.291192
0.111132	0.43731
0.084672	0.139856
0.0719712	0.18891
0.746928	0.1491
0.0353808	0.0973623
0.6048	0.65604
0.316159	0.189208
0.0436968	0.7786
0.141977	0.316092
0.221054	0.0503958
0.110074	0.82005
0.125345	0.118236
0.162842	0.154169
0.113854	0.127928
0.9828	0.0515886
0.097524	0.120025
0.178718	0.067095
1.04857	0.46385
0.24192	0.22365
0.85685	0.56658
0.7938	0.70077
0.0938952	0.0259434
0.17388	0.0499485
0.0724248	0.210529
0.0774144	0.437907
0.874843	0.0569562
0.0961632	0.842713
0.275335	0.118833
0.152107	0.216344
1.04464	0.780539
0.273823	0.198154
0.20291	0.0441336
0.0482328	0.0383187
0.57199	0.5964
0.144396	0.127779
0.93744	0.624729
0.0849744	0.19875
0.27972	0.132252
0.100397	0.946785
0.417917	1.03013
1.00805	0.114807
0.0618408	0.127779
0.14621	0.0274344
0.0435456	0.115254
0.23764	0.0614292
0.0579715	0.3644
0.647325	0.0181902
0.0742266	0.125393
0.0523614	1.24245
0.11695	0.172956
0.0453127	1.18042
0.423926	0.5715
0.220954	0.58149
0.079549	0.33294
0.0391272	0.324143
0.0184128	0.73059
0.528793	0.17236
0.269719	0.0410025
0.0397026	0.68422
0.162119	0.0764883
0.0456005	0.172658
0.510668	0.0606837
0.156365	0.0548688
0.0481898	0.111825
0.0447374	0.338606
0.0369695	0.0530796
0.284248	0.101388
0.042148	0.031311
0.487508	0.11928
0.0128027	0.352472
0.337041	0.4224
0.0428673	0.0345912
0.0818506	0.0329511
0.0697673	0.0180411
0.14385	0.11436
0.43155	0.180262
0.126156	0.863289
0.043155	0.274344
0.0755212	0.151038
0.263677	0.0981078
0.0264684	1.62027
0.0561015	1.08351
0.523039	0.0542724
0.368975	0.263758
0.0123711	0.340246
0.112059	0.084987
0.0458882	0.243928
0.116806	0.0888636
0.122129	0.0383187
0.05754	0.22365
0.305681	0.461315
0.0619994	0.121964
0.387244	0.0618765
0.264828	0.0688842
0.283097	0.196514
0.135507	0.493223
0.0932148	0.77532
0.110189	0.124051
0.318052	0.0508431
0.0568208	0.0478611
0.387244	0.129419
0.182546	0.100792
0.0343801	0.250786
0.943081	0.0287763
0.558282	0.0468174
0.334307	1.13689
0.0621432	0.0776811
0.101558	0.10765
0.0479021	0.0837942
0.174202	0.32966
0.0762405	0.291938
1.19079	0.39765
0.0332293	0.232298
0.155502	1.00866
0.466218	0.616529
0.0409972	0.114658
1.05356	0.0426426
0.0395587	1.00642
0.204699	0.197259
0.0680411	0.921289
0.236058	0.0632184
0.139247	0.101388
0.924812	0.0754446
0.0559576	0.367979
0.131623	0.543768
0.0991126	0.0994497
0.0943656	0.114658
0.811314	0.816322
0.815198	0.233043
0.0799806	0.0642621
0.0952287	0.612503
0.0782544	0.274493
0.479884	0.692271
0.324526	0.722837
0.117525	0.0067095
0.0484774	0.398693
0.0848715	1.12749
0.122129	0.643814
0.0069048	0.117043
0.0773913	1.05429
0.621144	0.71404
0.0464635	0.0791721
0.0563892	0.050694
0.74802	0.0757428
0.0315032	0.0903546
0.522751	0.0451773
0.0707742	0.28329
0.0572523	0.203671
0.30338	0.0483084
0.0161112	0.180858
0.0165427	0.70241
0.277055	0.0817068
0.134356	0.616529
0.655381	0.0022365
0.170031	0.254365
0.0392711	0.46713
0.139247	0.200838
0.116518	0.159239
0.106017	0.0053676
0.643585	0.0351876
0.14385	0.0350385
0.321361	0.789037
0.31273	0.0415989
1.03227	0.461166
0.0273315	0.239455
0.104435	0.194874
0.15579	0.489943
1.30486	0.144925
0.504482	0.446405
0.452121	1.03311
0.917044	0.235131
0.406952	0.152828
0.545479	0.1491
0.56346	0.0322056
0.162263	0.0916965
0.791175	0.103774
0.0126588	0.1491
0.781393	0.233789
0.0817068	0.0354858
0.655381	0.202627
0.0668902	0.0243033
0.954445	0.321161
0.911002	0.0721644
0.753055	0.668564
0.0627186	0.236025
0.0618555	0.2402
1.02134	0.841371
0.0756651	0.144776
0.108751	0.0577017
0.771324	0.19875
0.494412	0.111378
0.701269	0.0444318
0.152913	0.635431
0.0329417	0.167296
0.119827	0.0143608
1.17137	0.062181
0.434139	0.03568
0.992133	0.130136
1.36658	0.091643
0.0392711	0.983496
0.618555	0.962325
0.0801244	0.126731
0.0199951	0.0747653
0.527498	0.417205
0.0994003	0.0756535
0.546198	0.330003
0.0966672	0.10023
0.0634379	0.136946
0.0903378	0.14879
0.0756651	0.0337554
0.286837	0.377824
0.0907693	0.0309424
0.0926394	0.151011
0.10012	0.16552
0.16068	0.522468
0.41846	0.0454514
0.387244	0.0213192
0.127307	0.0374567
0.0310716	0.0910507
0.254471	0.71064
0.0014385	0.0105115
0.00302085	0.0137687
0.00704865	0.385818
0.508941	0.41454
0.447517	0.245467
0.0506352	0.270931
0.11508	0.0959364
0.106449	0.0346437
0.5754	0.300986
0.0120834	0.23688
0.078686	0.103931
0.124718	0.0953442
0.0660272	0.0618849
0.759384	0.0835002
0.678972	0.190096
0.11508	0.158265
0.0545192	0.102006
0.0148165	0.0843885
0.0408534	0.103783
0.749602	0.0319788
0.186142	0.132653
0.204267	0.0367164
0.0745143	0.125398
0.10127	0.023688
0.0650202	0.124214
0.354878	1.33245
0.280076	0.60508
0.106593	0.179585
0.0500598	0.0050337
0.141405	0.0877937
0.727737	0.0469318
0.671348	0.0685472
0.5298	0.601231
0.0867416	0.394849
0.0670341	0.582577
0.104291	0.19513
0.507503	0.127915
0.147159	0.017766
0.12889	0.647719
0.451257	0.641501
0.21074	0.0607005
0.0071925	0.757276
0.0122273	0.0396774
1.06449	0.100378
0.780099	0.14805
0.160537	0.228145
0.0491967	0.756091
0.0195636	0.0608486
0.175353	0.918798
0.0188443	0.0755055
0.616829	0.0370125
0.0663148	0.348954
0.28396	0.789551
0.0802683	0.229626
0.146152	0.0568512
0.0135219	0.101858
0.089187	0.254498
0.536992	0.076986
0.0535122	0.0572954
0.032654	0.0909027
0.612801	0.0935676
0.0880362	0.172774
1.13124	0.709011
0.0847277	0.0535941
0.547493	0.0173218
0.655381	0.636911
0.0737951	0.0564071
0.811746	0.0649939
0.53541	0.0485604
0.263677	0.163151
0.159817	0.966618
0.246559	0.991343
1.05126	0.0185062
0.159242	0.112962
0.124862	0.076838
0.0979619	0.718043
0.135794	0.067955
0.119827	0.310609
0.792901	0.0877937
0.996305	0.861355
0.174202	0.0718043
0.11882	0.0626252
0.0765282	0.368941
0.437736	0.336222
0.472691	0.229922
0.0250299	0.205641
0.5754	0.158117
0.0683287	0.0254646
0.531382	0.0155453
0.0530807	0.05922
0.530663	0.276853
0.162982	0.800802
0.728888	0.0487085
0.0819945	0.510772
0.665306	0.616924
0.216063	0.625067
0.144425	0.726185
0.227139	0.0883859
0.0699111	0.155897
0.0806999	0.0136206
0.615534	0.0455994
0.598416	0.388631
0.532245	0.63854
0.0723566	0.0760977
0.0827138	0.6036
0.610499	0.542899
0.0438742	0.0892741
0.114073	0.125842
0.095948	0.465321
0.033517	0.326894
0.611363	0.0808353
0.151762	0.666225
0.41774	0.649199
0.839077	0.0173218
0.147734	0.0498929
0.0913448	0.0185062
0.0691918	0.0285736
0.379045	0.796805
0.0388395	0.12451
0.107168	0.511069
0.157516	0.0811314
0.148453	0.224444
0.928552	0.0683991
0.113785	0.247984
0.988969	0.156341
0.031647	0.370125
0.0441619	0.536977
0.021146	0.12303
0.102853	0.100674
0.0523614	0.0530019
0.345959	0.0519655
0.753774	0.0408618
0.643585	0.0108077
0.0821383	0.0609966
0.060417	0.210083
0.0677534	0.0140648
0.908844	0.0451553
0.0251738	0.0421943
0.0217214	0.506923
0.0796929	0.0500409
0.0970987	0.0324229
0.0267561	0.53905
0.0602731	0.20046
0.0821383	0.0393813
0.0261807	0.0777262
0.0579715	0.00843885
0.022009	0.17766
0.0684726	0.156341
0.853174	0.82908
0.185135	0.0436747
0.864682	0.86017
0.77679	0.68177
0.231167	0.0880897
0.485925	0.0897183
0.450682	0.256719
0.0378325	0.604044
0.142699	0.0669186
0.148022	0.362723
0.126444	0.132209
0.094941	0.0571473
0.0222968	0.47302
0.111915	0.44415
0.162119	1.07114
0.685158	0.0487085
0.220666	0.253758
0.0204267	0.0851288
0.464204	0.191429
0.107887	0.0703238
0.0827138	0.382413
0.48909	0.0103635
0.133637	0.120365
0.126588	0.00251685
0.0801244	0.0635134
0.032654	0.24221
0.0886116	0.530463
0.121122	0.75165
0.0441619	0.838999
0.0427235	0.695835
0.70731	0.0581837
0.784989	0.0900144
0.693069	0.086017
0.882088	0.3303
0.136226	0.145385
0.296619	0.0241322
0.260369	0.0472279
0.100695	0.079947
0.912872	0.0609966
0.590073	0.548081
0.222392	0.216005
0.0619994	0.455846
0.045025	0.113554
0.247997	0.171146
0.253032	0.132505
0.0726442	0.0470799
0.239798	0.74025
0.104579	0.241025
0.080556	0.0910507
0.263677	0.394849
0.240373	0.619145
0.175065	0.616924
0.207719	0.00488565
0.204555	0.0833521
0.0491967	0.0962325
0.0612801	0.164484
0.0962357	0.0895703
0.185998	0.0987493
0.361639	0.068251
0.215775	0.0907547
0.359625	0.0530019
0.0477582	1.15479
0.0868854	0.224444
0.0299208	0.0171738
0.0100695	1.31128
0.179812	0.655713
0.961493	0.0420462
0.0217214	0.114147
0.0034524	0.0968247
0.049916	0.18225
0.0514983	0.0226516
0.0077679	0.797249
0.46032	0.539346
0.797648	0.0780224
0.195204	0.0636615
0.0631502	0.067955
0.120834	0.149975
0.117957	0.0547785
0.406232	0.8883
0.122273	0.123918
0.0338048	0.128803
0.0317909	0.700128
0.0596978	0.0864612
0.436872	0.369089
0.394894	0.666225
0.202703	0.849363
0.48048	0.102303
0.361411	0.501741
0.172072	0.140648
0.173423	0.401364
0.84084	0.056259
0.835284	0.0309424
0.0435435	0.0142128
0.0216216	0.726777
0.0427927	0.657934
0.0231231	0.122882
0.695195	0.239101
0.938438	0.422683
0.198949	0.11311
0.222823	0.869794
0.0977477	0.0453033
0.125525	0.155304
0.169369	0.212452
0.215916	0.0353839
0.0557057	0.279666
0.499399	0.697908
0.073123	0.13058
0.519819	0.201732
0.61036	0.15566
0.385885	0.112869
0.0705705	1.27913
0.0908407	0.24676
0.131081	0.235429
0.577927	0.0990024
0.0561561	0.073059
0.0794293	0.202031
0.679879	0.0256452
0.735735	0.809911
0.18018	0.517526
1.1057	0.0925911
0.986035	0.0708225
0.368618	1.22471
0.0537537	0.0374241
0.0860359	0.380354
0.69069	0.517526
0.352402	0.0697788
0.9009	0.147162
0.208558	0.0256452
0.433783	0.118236
0.142943	0.0384678
0.0992491	0.124051
0.938438	0.138365
0.0734233	0.0062622
0.377627	0.674827
0.541141	0.0225141
0.160661	0.191743
0.78078	0.115702
1.30841	0.0141645
0.15015	0.349192
0.117718	0.0627711
0.113964	0.374837
0.0313814	0.497994
1.07417	0.227378
1.28994	0.91115
0.145195	0.46221
0.0136636	0.0456246
0.391141	0.0216195
0.0707206	0.0405552
0.103003	0.0117789
0.0405405	0.734914
0.176126	0.0146118
0.0773273	0.1822
0.96096	1.03997
0.235135	0.0454755
0.327627	0.0987042
0.271471	0.8615
0.0504504	0.871937
1.0042	0.247059
0.0045045	0.0888636
1.32913	0.24676
0.107808	0.0679896
0.572372	0.19875
0.545945	0.285377
0.075075	0.240498
0.0219219	0.239156
0.34069	0.150293
0.104504	0.7455
0.075075	0.683325
0.183633	0.4804
0.0276276	0.471156
0.375375	0.788143
0.122823	0.0843906
0.766215	1.40154
0.0357357	1.0358
0.0432432	0.0195321
1.25585	0.122411
0.115615	0.131208
0.152252	0.438056
0.046096	0.241691
0.0021021	1.22888
0.0081081	1.00001
0.0857356	0.14746
0.0707206	0.0994497
0.089039	1.08232
0.468468	0.0653058
0.451651	0.0784266
0.457958	0.0639639
1.27628	1.34786
0.402402	0.178324
1.05105	0.053676
0.0948948	0.722539
1.21922	0.0386169
0.073123	1.00359
0.0590089	1.2265
0.197297	0.0427917
0.895945	0.0336966
0.918918	0.0812595
0.517117	0.180858
0.788288	0.947829
0.763663	0.0404061
0.10976	1.50248
0.0774774	0.0152082
0.075075	0.0237069
0.0938438	0.149845
0.0632131	0.0489048
0.105706	0.147311
0.0367868	0.434179
0.0399399	0.174745
0.0406907	0.162668
0.0406907	0.492626
0.0512012	1.20204
0.130631	0.0444318
0.426576	0.315496
0.0384384	0.799772
1.08018	0.0219177
0.887236	0.208442
0.368919	0.1491
0.20015	0.128375
0.0701201	0.442678
0.125375	0.152977
0.603903	0.161326
0.0734233	0.16401
0.09009	0.527069
0.0262763	0.010437
0.675675	0.0460719
0.67027	0.104519
1.06877	0.0828996
0.919669	0.915921
0.0926426	0.125244
0.228228	0.323994
0.0666666	0.0108843
0.0229729	0.82005
0.126877	0.840328
0.066066	0.154766
0.0358858	0.675572
0.110811	0.316837
0.0903903	0.18548
0.0243243	0.0735063
0.00165165	0.919052
0.0024024	0.0322056
0.813363	0.101537
0.0165165	1.02611
0.445345	0.2982
0.0102102	0.0553161
0.03003	1.18788
0.057057	0.34293
0.052102	0.565387
0.0864864	0.857325
0.795795	0.0575526
0.125075	0.90459
0.112613	0.0271362
0.16021	1.12541
0.145796	0.111378
1.18619	1.22262
0.117417	0.24855
0.0834834	0.130761
0.0397897	0.12092
0.124474	0.226334
0.133333	0.410025
0.707807	0.303717
1.2012	0.756384
0.0672672	0.45401
0.0812312	0.416884
0.391741	0.0284781
0.272973	1.01209
0.168168	0.421357
1.00105	0.25839
1.41576	1.3507
0.9009	0.0080514
0.419519	0.028329
0.0423423	0.0281799
0.0423423	0.0202776
0.427928	1.43464
0.0887387	0.2982
0.566516	0.161923
0.156757	0.016401
0.113664	0.807675
0.203904	1.03431
0.147297	0.277326
0.9009	0.995988
0.0654654	0.170421
0.425375	0.247208
0.0441441	0.0505449
0.0118619	0.0906528
0.66066	0.155511
0.41036	0.13911
0.425375	0.0049203
0.127327	0.040257
0.316967	0.570457
0.0099099	1.03923
0.966966	0.0915474
0.153003	0.734019
0.685435	0.515141
0.0495495	0.0471156
0.0839339	0.958564
0.099099	0.249892
0.0262763	0.166843
0.0222222	0.309681
0.192192	0.0599382
0.884233	0.0600873
0.605705	0.986297
0.382582	0.14075
0.0412913	0.514544
0.0483483	0.102283
0.0743242	1.21681
0.318618	0.76041
0.232733	0.0612801
0.0202703	0.161475
0.101952	1.44955
1.30841	0.0650076
0.0927927	0.0952749
0.101351	0.642919
0.76081	0.0602364
0.197597	0.0739536
0.108258	0.417778
0.143844	0.124797
0.101952	0.922333
0.0830329	1.03311
0.463963	0.665284
0.364114	0.186375
0.70075	0.250935
0.247297	0.216493
0.0102102	0.064113
0.104955	0.131954
0.108408	0.173403
0.163213	0.105414
0.0636636	1.32326
0.425375	0.133892
0.143694	0.156257
0.166817	0.376627
0.21021	0.605793
1.28949	0.545855
0.0370871	0.0132699
0.172673	0.38766
0.129429	0.115105
0.075075	0.456544
0.457207	0.436714
0.0929428	0.342334
0.0271772	0.90295
1.09399	1.32326
0.518768	0.0675423
0.0136636	0.659171
0.70075	0.474436
0.0741741	0.613546
0.310961	1.16089
0.224324	0.0837942
0.0441441	0.0876708
0.0439939	0.54675
0.13994	1.01746
0.567267	0.1491
0.00495495	0.332642
0.00345345	0.106159
0.0102102	0.5964
0.168468	0.398097
0.0828828	1.0437
0.0722221	0.56002
0.00555555	0.0086478
0.0139639	0.0826014
0.253754	0.0961695
	0.0945294
	0.0384678
	0.128226
	0.37275
	0.0201285
	1.32058
	0.118684
	0.121516
	0.0532287
	0.0111825
	0.062622
	0.0618765
	0.99897
	0.038766
	0.0202776
	0.004473
	0.217537
	0.0105861

## Sheet: Extended Data Figure 7c
DDBEosk run length - Tm1 (µm)	DDBEosk run length + Tm1 (µm)		Bin Center (µm)	1 - cumulative frequency DDBEosk run length - Tm1 (µm)	1 - cumulative frequency DDBEosk run length + Tm1 (µm)
2.48503	7.84004		0	0.884886	0.905792
1.89	2.97497		2	0.483947	0.500386
2.17003	6.54497		4	0.295223	0.301158
1.995	5.74003		6	0.178543	0.181467
3.91996	3.78		8	0.108066	0.112741
1.05	1.08496		10	0.07361	0.0625483
4.02496	4.79504		12	0.0422866	0.0316602
2.17003	4.69003		14	0.0227095	0.0169884
2.02996	2.48503		16	0.0109632	0.0108108
10.78	13.23		18	0.00704777	0.00694981
1.96003	2.44997		20	0.00626468	0.0015444
3.255	4.44496		22	0.00469851	0.0015444
3.15	4.48003		24	0.00313234	0
8.68004	2.94		26	0.00078309	0
1.68	3.28997		28	0	0
1.96003	8.26004
3.78	2.13496
3.74504	2.48503
1.50497	2.27503
1.785	10.955
1.60997	10.045
2.44997	3.28997
1.71497	2.625
2.90503	2.69503
3.78	2.69503
2.34497	3.81496
1.33004	6.01997
2.90503	6.79003
4.935	0.595035
9.24	11.48
0.559965	1.43504
7.06996	2.27503
8.95997	6.195
3.15	11.655
4.83	11.095
4.515	1.43504
4.41	3.07997
7.17497	10.99
6.37003	24.36
1.05	5.04
1.71497	1.01503
2.205	2.38003
0.874965	0.979965
1.05	19.425
1.89	5.985
0.735	2.94
3.78	13.37
2.76497	2.52
5.25	7.035
0.84	2.17003
11.41	3.91996
6.405	1.47
2.69503	7.42004
1.54004	4.16503
6.16003	1.33004
5.84504	0.735
13.65	6.16003
13.685	2.31
2.69503	1.85503
1.50497	2.31
6.47504	6.195
2.76497	2.1
4.83	17.43
6.68504	20.37
2.23997	9.135
4.75997	1.54004
0.700035	10.955
1.575	3.85004
13.65	5.11003
7.14	1.05
9.135	1.50497
2.02996	2.80003
1.75004	7.06996
5.46	5.49496
5.70496	2.17003
5.63504	10.535
6.16003	9.16996
5.67	5.95003
1.85503	2.55497
6.05504	0.735
6.09	3.85004
2.13496	5.00504
4.33997	2.835
2.69503	1.54004
6.79003	1.18996
2.59003	1.50497
4.23496	4.515
6.47504	1.26
6.85996	3.255
3.01003	4.48003
2.415	3.11504
2.90503	1.81997
1.26	3.53504
0.945	1.96003
2.52	1.64504
2.02996	2.17003
0.84	1.47
1.12003	1.29496
0.910035	2.13496
3.28997	1.96003
2.52	1.81997
1.26	3.01003
2.44997	4.90003
3.49996	0.910035
1.50497	0.910035
1.01503	5.38997
1.54004	3.01003
2.02996	7.63004
8.95997	4.515
2.31	2.415
1.39996	7.48996
4.33997	3.39497
3.85004	1.89
3.675	6.72
3.11504	7.98
1.575	2.65997
0.664965	7.73503
6.01997	3.465
8.05003	5.49496
3.91996	2.97497
2.02996	10.815
0.664965	10.43
5.38997	5.42504
2.59003	3.465
4.095	2.23997
2.94	9.87
3.15	3.15
2.38003	2.34497
1.60997	4.305
1.12003	2.34497
6.51	5.17997
4.06004	5.63504
1.01503	6.93
4.90003	10.64
12.39	24.78
3.49996	7.42004
8.715	9.555
2.48503	1.29496
7.10503	4.935
3.91996	0.910035
1.47	6.3
4.33997	2.48503
1.155	2.86997
6.01997	1.71497
9.73004	19.495
6.405	14.525
1.71497	16.24
5.145	11.48
6.43996	3.18497
1.96003	2.38003
0.945	10.08
1.39996	1.96003
3.70996	1.68
1.47	8.05003
2.415	7.06996
6.01997	1.33004
1.26	9.06497
1.68	4.12997
10.92	10.535
12.285	7.59497
2.415	4.935
0.84	13.79
0.84	20.055
1.08496	8.61
1.68	1.785
1.365	1.50497
0.735	3.70996
5.67	10.57
0.735	10.115
5.17997	3.01003
1.29496	5.84504
8.95997	3.18497
2.44997	6.26504
2.80003	1.64504
5.00504	1.81997
2.27503	3.85004
1.12003	6.3
1.54004	2.23997
0.559965	7.17497
0.664965	1.68
0.525	4.12997
2.59003	1.365
5.46	3.60496
4.44496	2.17003
5.145	1.92497
3.36	4.62
7.00003	3.78
6.68504	1.995
14.49	1.71497
2.17003	1.22504
7.14	2.90503
1.26	1.18996
5.32003	0.63
9.03	1.96003
6.51	1.155
4.41	1.365
15.365	5.11003
2.73	0.595035
14.035	5.355
2.205	2.80003
11.9	5.07496
5.84504	3.045
5.04	1.43504
1.26	1.39996
6.195	13.23
3.81496	2.625
3.60496	5.95003
5.565	5.42504
2.415	12.6
2.13496	12.74
6.405	12.635
0.910035	4.48003
5.985	2.65997
3.81496	14
1.12003	1.92497
1.75004	1.89
2.55497	1.96003
1.995	4.33997
7.94503	1.68
4.54997	4.83
2.625	0.63
11.41	2.06503
4.935	1.155
2.90503	5.565
2.17003	2.90503
1.50497	7.665
5.00504	2.94
9.73004	5.63504
2.1	10.08
0.945	10.64
7.7175	3.53504
3.9375	5.80997
6.1425	2.90503
3.465	1.575
4.9875	1.47
7.665	3.74504
11.2875	7.035
13.3875	3.18497
0.84	3.57
4.095	2.02996
1.6275	1.47
10.6575	8.11997
0.5775	4.305
15.9075	2.86997
6.93	12.775
15.8025	7.42004
2.5725	4.83
1.785	16.135
2.625	4.725
2.835	1.22504
15.6975	1.155
1.7325	12.075
1.89	4.725
15.645	1.995
5.355	2.34497
1.995	6.825
7.98	3.11504
5.46	1.05
1.2075	3.11504
3.045	1.50497
12.285	3.18497
0.805035	3.60496
16.66	5.04
8.43497	3.255
1.75004	2.415
4.79504	9.58996
3.85004	1.155
6.3	1.54004
4.79504	1.26
4.79504	12.46
5.74003	4.37503
2.1	1.68
2.52	3.36
2.625	1.64504
8.43497	4.54997
4.62	3.74504
14.98	1.85503
4.96997	1.01503
5.67	3.885
0.84	0.910035
3.78	4.44496
1.64504	2.44997
5.95003	8.4
3.22004	1.85503
2.80003	1.29496
15.715	2.48503
12.39	1.60997
5.38997	3.57
0.805035	0.945
5.985	12.355
2.06503	4.27004
2.625	9.975
4.02496	0.874965
4.2	1.575
3.43004	3.70996
1.155	8.715
1.26	9.16996
4.79504	6.33497
1.60997	5.565
0.945	6.37003
5.42504	0.664965
4.65496	12.845
1.155	5.67
4.58504	4.725
3.01003	4.2
1.71497	3.78
6.01997	9.24
2.17003	5.53003
5.70496	3.18497
2.02996	1.08496
0.979965	1.47
1.71497	6.195
2.835	1.155
4.41	0.735
8.505	2.06503
8.05003	1.26
7.56	3.045
1.96003	0.595035
1.64504	2.48503
2.835	2.34497
2.76497	0.595035
14.35	0.9975
14.77	4.90003
22.365	8.89003
4.725	3.43004
2.76497	2.1
4.16503	2.31
17.92	1.64504
1.64504	0.910035
1.47	1.365
5.88	1.995
11.795	1.01503
14.385	1.08496
6.58003	2.415
3.78	1.18996
11.515	1.50497
7.17497	6.37003
2.02996	1.575
3.53504	2.31
6.75497	1.08496
4.41	3.045
2.90503	5.145
4.54997	1.89
5.53003	8.01497
4.305	5.38997
4.935	6.3
5.28496	1.365
10.605	2.86997
2.80003	1.39996
10.78	3.15
14.35	1.12003
1.26	2.90503
1.75004	2.27503
3.39497	2.52
3.85004	1.39996
2.415	1.60997
0.910035	3.465
6.22996	4.44496
4.06004	4.725
2.415	5.46
1.54004	1.26
1.47	7.38497
0.735	7.38497
0.84	7.42004
2.835	7.59497
1.33004	2.34497
1.575	1.05
1.71497	1.22504
2.23997	3.465
1.92497	1.47
1.08496	2.48503
4.44496	8.15503
1.68	8.715
0.525	0.979965
0.525	1.33004
0.910035	3.49996
2.94	2.13496
1.68	6.825
1.365	4.23496
4.54997	4.02496
1.81997	0.525
1.85503	4.58504
7.31503	10.535
3.07997	2.1
1.29496	10.745
1.08496	0.979965
5.25	6.51
6.93	10.535
11.795	8.32996
3.255	0.664965
0.874965	1.22504
7.35	0.664965
4.725	7.31503
10.255	7.69996
2.625	6.26504
0.84	0.910035
5.88	1.33004
8.05003	1.75004
3.675	5.84504
11.62	3.74504
10.885	1.575
5.74003	0.735
2.52	1.08496
5.53003	2.44997
8.43497	0.979965
1.68	0.595035
0.979965	0.910035
3.28997	1.85503
6.43996	0.945
0.559965	1.155
1.50497	13.65
1.26	2.65997
0.874965	2.80003
0.525	4.27004
2.59003	4.095
2.17003	1.89
3.18497	6.68504
0.945	11.27
1.75004	1.47
3.60496	1.89
2.23997	1.01503
1.60997	5.04
2.1	2.13496
7.245	5.25
1.39996	16.905
3.39497	3.045
2.48503	3.53504
4.86496	13.58
1.39996	1.33004
11.48	3.70996
10.92	9.41503
5.67	12.845
1.18996	2.06503
1.68	4.86496
1.155	1.71497
4.02496	13.37
4.48003	4.86496
2.65997	3.49996
2.59003	5.07496
0.769965	1.05
2.205	7.42004
2.1	2.835
2.59003	3.01003
3.57	1.12003
4.16503	1.47
0.979965	2.31
3.57	1.12003
7.665	3.74504
1.33004	4.12997
1.22504	2.34497
1.71497	3.885
2.80003	0.63
7.84004	14.735
7.77	0.525
0.735	3.64004
4.27004	6.33497
9.16996	4.75997
2.86997	1.575
8.715	14.385
4.06004	10.71
3.01003	8.74996
1.995	5.38997
1.29496	16.975
1.12003	3.32504
0.525	2.415
0.945	2.17003
2.55497	10.465
4.86496	1.05
1.64504	2.205
3.39497	5.49496
3.39497	3.07997
4.44496	1.12003
0.595035	6.96497
5.07496	12.775
11.655	4.16503
11.305	0.910035
2.17003	1.575
0.700035	1.08496
0.700035	1.50497
0.910035	2.13496
5.565	5.53003
4.16503	1.155
11.62	3.36
8.89003	18.305
0.874965	10.36
0.769965	2.34497
2.27503	7.98
2.44997	2.27503
5.49496	7.17497
8.61	1.12003
7.38497	1.785
0.735	4.27004
11.48	0.84
2.76497	8.05003
3.255	4.83
1.85503	5.70496
5.63504	2.73
5.46	1.22504
0.664965	5.49496
3.01003	3.49996
2.205	5.985
4.54997	3.11504
5.985	3.53504
1.54004	0.874965
1.81997	1.155
2.65997	1.54004
1.47	1.54004
2.76497	1.22504
1.785	1.92497
2.27503	2.65997
7.98	4.02496
0.664965	5.46
6.22996	4.86496
2.52	6.93
4.095	2.1
2.06503	3.81496
7.17497	2.38003
11.095	9.90497
1.155	0.735
1.12003	1.785
1.64504	2.38003
10.115	6.37003
11.13	1.68
2.76497	8.78504
1.85503	1.54004
10.36	1.85503
8.085	12.81
6.12497	1.785
4.515	1.60997
0.769965	13.02
10.99	2.23997
10.955	7.94503
3.18497	2.76497
3.11504	2.17003
3.64004	5.38997
4.27004	5.91496
2.80003	4.095
1.85503	11.69
5.32003	0.979965
1.18996	5.145
2.835	3.07997
11.095	2.23997
2.31	3.91996
11.41	7.21004
3.255	2.48503
9.69496	7.84004
2.17003	2.23997
10.745	12.74
0.945	4.96997
1.05	11.55
0.874965	1.54004
1.785	1.05
5.49496	0.664965
8.64496	2.97497
5.70496	2.31
8.95997	3.85004
1.60997	5.28496
1.60997	1.64504
4.305	1.85503
1.995	1.54004
10.22	1.54004
2.02996	1.60997
3.43004	1.05
2.13496	3.18497
2.73	1.54004
0.700035	1.155
1.365	1.575
7.52503	0.979965
1.39996	1.575
1.785	1.33004
1.47	1.64504
0.63	2.27503
0.805035	2.205
1.22504	0.84
1.43504	1.64504
2.835	2.90503
0.735	9.10004
2.48503	2.205
5.67	13.405
5.32003	3.11504
2.34497	10.465
1.785	10.78
6.64996	3.78
3.045	1.68
4.44496	1.68
2.17003	3.07997
4.44496	0.700035
2.59003	1.64504
2.48503	4.44496
5.32003	2.65997
4.2	3.045
1.26	1.05
1.01503	1.12003
0.735	0.595035
1.33004	0.979965
1.08496	1.54004
2.835	0.700035
2.835	2.02996
0.559965	2.625
2.13496	1.01503
3.22004	3.32504
1.96003	1.60997
3.01003	1.365
9.27496	2.34497
3.85004	1.75004
0.735	1.71497
4.37503	1.29496
2.1	2.76497
3.11504	8.99503
2.48503	0.700035
1.155	3.85004
2.48503	0.769965
3.95504	1.365
2.06503	6.93
4.16503	5.565
4.75997	1.29496
2.90503	0.595035
10.045	1.43504
2.13496	2.65997
0.874965	0.910035
5.74003	1.18996
4.75997	0.805035
6.79003	0.595035
4.65496	0.84
1.92497	4.27004
1.575	6.26504
8.22496	12.565
1.05	10.5
2.94	2.69503
1.155	1.68
7.52503	11.41
1.12003	3.81496
1.39996	5.145
2.06503	0.805035
1.575	13.58
2.835	1.85503
4.12997	1.26
1.365	0.979965
1.575	0.945
1.12003	5.775
5.355	3.465
4.02496	0.63
1.22504	13.58
17.78	10.535
8.68004	3.91996
2.27503	1.50497
8.36504	2.73
12.355	5.38997
4.41	1.60997
0.525	0.910035
1.22504	1.155
5.28496	1.60997
1.12003	12.425
4.12997	2.23997
5.70496	1.29496
6.01997	2.13496
1.12003	3.53504
0.84	2.44997
0.84	0.945
0.805035	1.47
3.39497	11.515
5.21504	4.75997
5.25	14.07
15.435	8.05003
15.54	5.355
3.99	1.05
8.715	2.1
1.64504	1.89
1.29496	1.43504
1.81997	6.05504
23.03	1.96003
10.57	1.18996
3.15	1.50497
16.345	4.06004
3.78	2.17003
5.04	0.84
3.465	1.39996
4.935	7.665
14.28	1.75004
1.05	5.28496
6.93	14.665
1.96003	7.27996
13.195	2.27503
6.47504	13.405
7.035	2.31
1.22504	20.965
9.10004	4.23496
7.27996	6.64996
1.85503	5.88
2.205	6.93
3.32504	3.18497
1.43504	2.415
1.39996	2.80003
1.81997	11.445
4.83	0.700035
10.43	0.805035
3.32504	1.33004
6.05504	15.015
3.39497	1.155
1.39996	3.78
3.01003	6.26504
1.81997	0.805035
1.995	5.355
4.305	0.735
5.67	15.645
3.39497	1.64504
1.05	4.62
8.925	4.96997
14.455	1.12003
2.97497	4.935
0.63	2.13496
23.38	4.44496
13.09	4.06004
4.27004	4.65496
2.31	9.555
4.27004	19.985
1.365	1.60997
8.89003	1.22504
8.47003	18.13
6.93	3.39497
1.785	10.43
3.465	1.43504
3.18497	3.57
1.64504	5.46
1.85503	1.12003
1.54004	13.16
2.02996	1.64504
7.035	2.02996
10.535	1.39996
4.305	1.85503
4.12997	0.595035
12.075	2.94
2.65997	0.525
3.11504	4.86496
1.43504	0.664965
1.18996	1.01503
7.455	2.76497
2.1	1.155
12.705	1.50497
10.885	2.65997
1.92497	2.27503
1.365	1.85503
1.18996	3.60496
4.305	1.81997
1.39996	0.664965
1.995	3.28997
11.515	3.81496
7.00003	1.01503
1.995	5.28496
4.54997	6.51
1.50497	4.54997
6.79003	5.84504
1.33004	7.00003
13.09	5.42504
2.34497	8.47003
9.83503	6.47504
1.575	7.035
1.05	2.59003
0.945	7.48996
3.95504	0.735
12.285	2.59003
2.27503	1.785
1.33004	10.57
1.365	2.97497
2.34497	4.2
3.36	3.64004
1.22504	3.11504
3.78	1.60997
2.97497	1.12003
2.415	4.2
0.525	1.365
1.05	2.59003
1.785	6.01997
1.60997	2.94
0.979965	11.025
2.38003	6.405
0.559965	1.995
1.89	1.64504
2.65997	10.885
1.39996	2.80003
1.64504	2.97497
0.910035	2.97497
1.18996	1.155
7.94503	5.42504
4.12997	12.04
1.54004	2.17003
1.64504	4.725
1.365	1.995
3.255	1.89
3.465	1.22504
0.769965	1.50497
5.565	2.55497
8.57503	2.52
7.17497	0.664965
5.91496	0.910035
1.29496	5.04
2.59003	3.28997
2.90503	2.59003
1.68	0.769965
4.02496	1.22504
3.01003	1.12003
1.47	1.33004
5.28496	4.69003
2.97497	1.39996
1.18996	8.53997
7.94503	1.01503
8.89003	1.995
1.54004	0.979965
3.01003	2.44997
5.59997	2.73
4.41	6.01997
0.910035	4.65496
2.205	1.29496
3.885	7.94503
4.935	1.365
2.69503	5.88
1.365	5.00504
0.769965	1.54004
2.73	7.38497
2.02996	4.54997
8.85496	3.91996
2.86997	5.775
5.25	5.04
0.84	4.83
2.205	2.90503
0.979965	4.095
1.995	7.27996
1.96003	2.27503
0.559965	11.62
0.700035	0.945
14.315	1.50497
8.295	1.22504
12.11	3.18497
3.36	3.70996
4.79504	2.97497
7.17497	9.48497
2.02996	2.69503
2.76497	0.874965
2.34497	8.78504
4.62	5.28496
12.565	3.885
1.68	5.38997
3.32504	6.01997
2.17003	3.15
1.60997	2.94
3.22004	3.39497
6.51	4.90003
16.275	12.775
8.295	5.355
6.54497	6.72
3.01003	7.31503
12.67	6.51
1.155	10.29
4.90003	5.565
2.415	4.12997
0.945	1.75004
1.54004	1.64504
3.91996	2.835
6.33497	1.22504
1.08496	3.07997
9.555	3.53504
3.57	12.495
2.65997	4.83
2.55497	2.415
1.29496	5.25
14.875	10.64
8.36504	3.60496
1.05	6.47504
1.18996	2.80003
10.08	1.96003
10.185	3.18497
7.27996	1.47
1.29496	2.415
2.73	0.63
3.885	1.85503
12.775	1.54004
1.64504	3.885
15.33	3.78
3.78	1.54004
10.605	1.85503
1.785	8.925
5.38997	3.78
15.96	5.985
2.44997	0.559965
2.69503	2.02996
9.975	3.81496
5.63504	2.205
11.62	6.405
1.92497	2.02996
8.47003	5.07496
14.875	1.60997
2.27503	6.79003
2.48503	7.31503
8.19	4.86496
1.92497	7.245
0.700035	8.05003
0.805035	8.505
0.700035	2.23997
26.285	1.785
0.979965	4.095
25.585	2.76497
13.755	1.68
5.95003	0.559965
0.979965	2.94
5.46	2.13496
4.83	1.96003
4.86496	2.34497
5.355	3.01003
5.70496	7.90996
10.465	3.15
21.875	1.365
5.67	8.15503
1.08496	6.825
6.72	1.33004
0.63	2.17003
7.455	0.525
2.52	2.1
12.705	0.664965
6.01997	2.94
16.625	2.06503
18.515	4.27004
3.78	6.93
3.43004	3.95504
4.37503	5.00504
9.87	3.885
7.245	7.14
4.54997	1.96003
6.16003	3.43004
4.305	0.874965
8.64496	2.90503
4.79504	4.58504
1.47	2.835
17.43	4.305
12.67	2.59003
3.11504	0.84
0.595035	2.55497
2.48503	2.625
1.155	1.01503
1.75004	1.08496
1.785	2.17003
3.22004	0.910035
7.455	0.700035
4.44496	4.41
10.71	1.89
5.00504	3.01003
6.51	2.31
0.945	1.18996
3.675	1.64504
2.06503	3.465
8.78504	1.68
3.70996	3.01003
19.53	1.01503
1.89	5.70496
1.155	4.27004
1.33004	2.31
0.979965	0.945
28.21	1.39996
25.41	6.09
7.035	5.00504
4.06004	4.095
1.26	3.22004
1.75004	6.75497
14.035	5.38997
1.92497	2.59003
1.05	2.625
0.84	4.44496
5.25	6.47504
3.465	3.36
4.27004	4.83
4.90003	5.25
1.365	1.01503
10.85	0.63
1.89	0.910035
1.81997	0.700035
3.18497	0.805035
3.39497	1.33004
6.16003	5.17997
0.84	3.22004
1.575	2.06503
2.38003	2.73
2.34497	1.64504
0.525	1.29496
0.664965	2.17003
0.525	2.17003
4.44496	2.27503
0.559965	0.945
0.595035	1.785
1.43504	4.48003
1.995	3.39497
0.525	2.44997
1.12003	3.57
2.13496	5.88
1.33004	7.35
0.63	3.95504
0.735	7.94503
3.675	1.18996
3.36	3.57
2.97497	1.26
0.979965	7.69996
0.735	7.94503
2.13496	4.02496
2.86997	6.54497
2.48503	1.575
1.89	7.63004
3.36	4.935
9.52004	2.13496
1.92497	1.995
7.035	7.875
3.91996	1.33004
3.11504	4.305
7.17497	2.90503
1.575	1.89
12.005	1.39996
1.43504	5.80997
8.74996	2.94
2.625	7.59497
1.85503	4.2
3.32504	8.22496
2.48503	1.33004
2.13496	3.74504
5.25	2.31
13.335	0.735
5.32003	0.595035
5.355	2.31
2.69503	0.525
1.575	0.805035
4.41	2.48503
15.47	2.94
3.57	5.70496
1.60997	1.68
3.36	1.05
12.53	6.51
3.36	2.48503
5.985	1.47
5.70496	7.84004
5.145	8.36504
2.31	2.06503
5.67	0.63
6.89504	2.65997
1.89	4.02496
8.78504	9.48497
2.48503	6.16003
2.415	4.12997
14.455	3.57
2.1	5.38997
0.874965	2.17003
0.910035	2.415
0.700035	0.874965
1.365	3.81496
2.625	2.23997
2.31	1.47
5.985	3.01003
6.05504	0.735
5.355	0.945
5.46	2.06503
4.27004	2.73
3.53504	5.985
1.01503	6.405
5.28496	3.255
0.805035	5.49496
3.255	3.15
6.615	1.92497
3.045	2.17003
1.26	1.18996
3.465	0.84
3.64004	0.769965
3.28997	0.664965
1.43504	4.83
2.13496	2.17003
2.97497	3.85004
3.36	9.765
2.90503	4.96997
4.2	6.93
1.64504	1.81997
1.47	9.41503
3.74504	2.02996
1.47	1.08496
8.36504	8.22496
0.979965	1.64504
2.13496	1.26
1.39996	2.34497
0.874965	1.75004
3.43004	2.69503
2.06503	8.32996
1.365	6.3
0.805035	5.775
7.875	4.06004
1.01503	5.53003
0.874965	3.885
8.68004	2.23997
5.17997	4.935
1.26	4.62
2.835	1.26
3.22004	4.33997
3.74504	4.095
5.145	1.64504
1.64504	1.64504
0.525	9.52004
0.525	9.62504
0.84	6.26504
0.84	1.18996
0.559965	6.85996
2.73	3.11504
12.845	2.86997
4.27004	0.525
4.75997	7.90996
2.34497	9.41503
2.94	1.26
3.36	2.205
7.10503	1.75004
1.33004	6.12497
3.465	8.925
1.60997	1.575
12.53	2.23997
5.355	0.84
1.08496	9.765
1.47	9.345
6.22996	2.73
3.32504	9.16996
1.155	4.69003
1.01503	1.92497
0.874965	6.64996
4.095	2.06503
1.33004	5.67
2.34497	6.93
3.28997	6.93
1.785	4.62
1.96003	2.65997
1.01503	4.515
2.1	0.595035
4.37503	3.18497
3.36	4.12997
7.80497	3.53504
2.27503	9.345
3.01003	2.48503
12.32	10.885
0.979965	9.975
2.31	1.365
6.33497	4.62
2.38003	1.155
0.945	5.32003
4.65496	2.415
5.355	1.18996
4.37503	2.13496
8.47003	0.525
3.43004	7.52503
3.78	9.03
1.33004	6.16003
0.84	2.625
2.17003	4.23496
1.71497	4.33997
1.68	12.46
2.76497	5.07496
1.68	10.115
2.38003	12.495
1.12003	7.35
0.595035	11.865
0.63	1.50497
2.27503	12.635
0.700035	4.095
3.01003	0.910035
2.31	1.26
0.525	8.36504
0.664965	1.60997
2.59003	3.18497
0.664965	3.22004
1.85503	0.769965
1.22504	6.37003
1.365	1.29496
11.76	11.095
8.19	2.27503
5.53003	10.045
1.50497	3.675
2.44997	12.285
1.68	1.50497
1.01503	7.48996
11.97	1.92497
2.31	5.775
5.32003	7.27996
17.92	2.34497
1.60997	10.57
2.1	1.39996
0.700035	12.355
7.52503	2.27503
4.90003	1.81997
4.62	5.38997
1.89	1.26
9.48497	3.15
2.94	1.12003
7.455	1.89
1.995	12.46
6.12497	12.6
8.715	1.33004
6.58003	1.05
3.91996	2.27503
2.52	3.885
8.85496	9.31003
1.47	5.84504
1.43504	2.80003
1.785	4.58504
0.700035	0.700035
0.874965	1.08496
1.54004	1.68
1.43504	0.979965
0.595035	1.22504
0.979965	0.595035
1.995	3.07997
0.805035	8.05003
5.63504	4.06004
5.67	4.48003
7.35	1.33004
4.44496	1.08496
0.664965	3.15
7.665	5.985
2.52	4.27004
1.18996	0.945
1.12003	1.71497
1.85503	4.305
4.095	3.01003
2.76497	2.94
9.10004	6.16003
1.33004	3.675
1.92497	8.85496
14.56	1.785
2.17003	10.465
0.84	10.955
13.3	6.12497
6.405	4.305
1.18996	2.65997
0.945	19.32
2.65997	2.52
0.874965	2.38003
1.71497	9.90497
0.805035	16.905
1.92497	9.31003
4.75997	3.39497
9.62504	2.02996
9.58996	0.874965
2.44997	3.53504
3.91996	6.405
0.910035	4.27004
3.01003	11.34
7.63004	17.255
0.874965	6.58003
2.55497	4.96997
2.97497	3.39497
1.575	0.769965
1.39996	1.68
1.47	2.27503
5.11003	7.56
0.664965	0.595035
0.805035	0.910035
2.415	1.54004
1.12003	1.71497
2.34497	1.43504
2.44997	2.17003
6.405	11.445
5.355	2.48503
6.64996	8.05003
1.575	2.94
2.44997	2.44997
1.365	3.74504
9.20504	3.81496
4.33997	7.00003
2.1	9.45
3.28997	3.07997
3.36	16.24
1.18996	0.805035
0.735	1.01503
0.664965	3.99
1.365	1.68
1.60997	18.13
0.559965	3.91996
1.29496	5.91496
0.700035	2.1
0.595035	7.17497
1.71497	1.71497
	4.06004
	1.995
	1.71497
	1.22504
	0.735
	4.33997
	7.245
	1.85503
	0.700035
	0.700035
	0.735
	0.769965
	2.34497
	0.700035
	0.84
	1.29496
	1.89
	0.805035

## Sheet: Extended Data Figure 7d
Processive dynein fraction - Tm1	Processive dynein fraction + Tm1		Per experiment average processive dynein fraction - Tm1	Per experiment average processive dynein fraction + Tm1
0.575	0.697368		0.600091	0.568329
0.62963	0.654412		0.564666	0.602439
0.604317	0.519685
0.6125	0.571429
0.597015	0.581633
0.613208	0.477612
0.538462	0.573964
0.620253	0.6
0.6125	0.478992
0.688312	0.54
0.509804	0.556522
0.560976	0.537736
0.704762	0.634146
0.47191	0.594203
0.563934	0.651163
0.558559	0.607143
0.530303	0.518519
0.650485	0.670213
0.610294	0.669355
0.430769	0.539474

## Sheet: Extended Data Figure 7e
Total dynein binding frequency - Tm1 (/µm/min)	Total dynein binding frequency + Tm1 (/µm/min)		Per experiment average total dynein binding frequency - Tm1 (/µm/min)	Per experiment average total dynein binding frequency + Tm1 (/µm/min)
1.206	1.04391		1.08183	1.1468
0.972842	0.922534		1.24527	1.42725
1.24784	1.11731
0.756215	1.33547
1.27456	1.27587
0.787654	1.07945
1.08917	1.18187
1.13144	1.20139
1.16603	1.46267
1.13281	1.11857
1.13559	0.875777
1.07541	1.15612
1.45689	1.36884
1.5963	1.16021
1.33014	1.80176
1.11212	1.63272
1.11097	1.2658
1.36743	1.57419
1.02855	1.62522
1.12961	1.26038

## Sheet: Extended Data Figure 7f
Processive dynein frequency - Tm1 (/µm/min)	Processive dynein frequency + Tm1 (/µm/min)		Per experiment average processive dynein frequency - Tm1 (/µm/min)	Per experiment average processive dynein frequency + Tm1 (/µm/min)
0.693452	0.727989		0.648026	0.647667
0.61253	0.603717		0.70529	0.869204
0.754091	0.580651
0.463182	0.763126
0.760931	0.742086
0.482996	0.515559
0.586476	0.678354
0.701781	0.720837
0.714196	0.700605
0.779724	0.604026
0.578928	0.487389
0.603279	0.621687
1.02676	0.868046
0.753309	0.6894
0.750112	1.17324
0.621183	0.991292
0.589149	0.65634
0.889495	1.05504
0.627721	1.08785
0.4866	0.67994

## Sheet: Extended Data Figure 7h
Fraction of motile dyneins colocalized with Tm1 - RNaseA	Fraction of motile dyneins colocalized with Tm1 + RNaseA		Per experiment average fraction of motile dyneins colocalized with Tm1 - RNaseA	Per experiment average fraction of motile dyneins colocalized with Tm1 + RNaseA
0.323529	0.0363636		0.296398	0.0710857
0.142857	0.04		0.240856	0.0357107
0.18	0.0625
0.157895	0.0138889
0.4	0.0972222
0.346774	0
0.285714	0
0.461538	0.121212
0.307692	0.0487805
0.3125	0.0526316
0.206897	0.0606061
0.258065	0.0930233
0.153846	0.0775862
0.25	0.0952381
0.380952	0.0196078
