# Supplementary material for: Tropomyosin 1-I/C coordinates kinesin-1 and dynein motors during oskar mRNA transport
Source: Nat Struct Mol Biol. 2024 Jan 31;31(3):476–88. doi: 10.1038/s41594-024-01212-x (PMC10948360; doi:10.1038/s41594-024-01212-x)
Supplement: Supplementary file 13 — Numerical source data file with lists of motor protein movements used for statistical analysis. [file 41594_2024_1212_MOESM13_ESM.xlsx]

## Sheet: Extended Data Figure 8a
Fraction of Khc FL movements minus-end-directed - Tm1	Fraction of Khc FL movements plus-end-directed - Tm1	Fraction of Khc FL movements minus-end-directed + Tm1	Fraction of Khc FL movements plus-end-directed + Tm1	Fraction of Khc940 movements minus-end-directed - Tm1	Fraction of Khc940 movements plus-end-directed - Tm1	Fraction of Khc940 movements minus-end-directed + Tm1	Fraction of Khc940 movements plus-end-directed + Tm1		Per experiment average fraction of Khc FL movements minus-end-directed - Tm1	Per experiment average fraction of Khc FL movements plus-end-directed - Tm1	Per experiment average fraction of Khc FL movements minus-end-directed + Tm1	Per experiment average fraction of Khc FL movements plus-end-directed + Tm1	Per experiment average fraction of Khc940 movements minus-end-directed - Tm1	Per experiment average fraction of Khc940 movements plus-end-directed - Tm1	Per experiment average fraction of Khc940 movements minus-end-directed + Tm1	Per experiment average fraction of Khc940 movements plus-end-directed + Tm1
1	0	1	0	0.473684	0.526316	0.756098	0.243902		0.714198	0.285802	0.977152	0.0228476	0.263804	0.736196	0.637522	0.362478
1	0	0.972973	0.027027	0.5	0.5	0.541667	0.458333		0.907692	0.0923077	0.972222	0.0277778	0.25467	0.74533	0.557542	0.442458
1	0	1	0	0.333333	0.666667	0.782609	0.217391		0.878205	0.121795	0.961359	0.0386406	0.31173	0.68827	0.531073	0.468927
0.5	0.5	1	0	0.333333	0.666667	0.363636	0.636364
0.75	0.25	0.933333	0.0666667	0.357143	0.642857	0.714286	0.285714
0.75	0.25	1	0	0	1	0.85	0.15
0.5	0.5	0.98913	0.0108696	0.318182	0.681818	0.4	0.6
0.75	0.25	1	0	0.363636	0.636364	0.772727	0.227273
1	0	0.95122	0.0487805	0.4	0.6	0.666667	0.333333
0.666667	0.333333	1	0	0.222222	0.777778	0.909091	0.0909091
0.4	0.6	1	0	0.283019	0.716981	0.8125	0.1875
0.5	0.5	0.964912	0.0350877	0.245614	0.754386	0.5	0.5
1	0	0.967213	0.0327869	0.413793	0.586207	0.615385	0.384615
1	0	1	0	0.25	0.75	0.695652	0.304348
0.5	0.5	1	0	0.30137	0.69863	0.5	0.5
1	0	0.882353	0.117647	0.214286	0.785714	0.911765	0.0882353
0.8	0.2	1	0	0.333333	0.666667	0.444444	0.555556
0.333333	0.666667	0.904762	0.0952381	0.407407	0.592593	0.9	0.1
0.5	0.5	1	0	0.3	0.7	0.823529	0.176471
1	0	1	0	0.272727	0.727273	0.5	0.5
0.5	0.5	1	0	0.153846	0.846154	0.647059	0.352941
0.5	0.5	1	0	0.166667	0.833333	0.7	0.3
0.5	0.5	1	0	0.25	0.75	0.566667	0.433333
1	0	0.888889	0.111111	0.176471	0.823529	0.6	0.4
1	0	1	0	0	1	0.619048	0.380952
0.333333	0.666667	1	0	0.0526316	0.947368	0.4375	0.5625
0.5	0.5	1	0	0	1	0.75	0.25
1	0	0.888889	0.111111	0.3	0.7	0.25	0.75
1	0	1	0	0.666667	0.333333	0.7	0.3
1	0	0.875	0.125	0	1	0.444444	0.555556
1	0	0.875	0.125	0.363636	0.636364	0.636364	0.363636
1	0	1	0	0.5	0.5	0.512821	0.487179
0.8	0.2	1	0	0.4	0.6	0.714286	0.285714
1	0	1	0	0.4	0.6	0.648649	0.351351
0.75	0.25	1	0	0.6	0.4	0.909091	0.0909091
0.75	0.25	1	0	0.25	0.75	0.75	0.25
1	0	0.9375	0.0625	0.727273	0.272727	0.8	0.2
0.5	0.5	1	0	0.222222	0.777778	0.641509	0.358491
1	0	1	0	0.34375	0.65625	0.6	0.4
1	0	1	0	0.234043	0.765957	0.5	0.5
0.75	0.25	1	0	0.4	0.6	0.707317	0.292683
1	0	1	0	0.25	0.75	0.576923	0.423077
1	0	1	0	0.111111	0.888889	0.525	0.475
0.666667	0.333333	0.947368	0.0526316	0.0769231	0.923077	0.55	0.45
1	0	1	0	0.166667	0.833333	0.833333	0.166667
1	0	0.884615	0.115385	0.5	0.5	0.609756	0.390244
1	0	0.923077	0.0769231	0.16	0.84	0.5	0.5
1	0	1	0	0.295455	0.704545	0.4	0.6
1	0	1	0	0.206897	0.793103	0.666667	0.333333
1	0	0.8	0.2	0	1	0.363636	0.636364
0.625	0.375	1	0	0.3	0.7	0.375	0.625
0.5	0.5	0.888889	0.111111	0.428571	0.571429	0.333333	0.666667
0.875	0.125	0.941176	0.0588235	0	1	0.5	0.5
		1	0	0.142857	0.857143	0.6	0.4
		1	0	0.0714286	0.928571	0.571429	0.428571
		0.75	0.25	0	1	0.633333	0.366667
		1	0	0	1	1	0
		1	0	0.333333	0.666667	0.625	0.375
		1	0	0.3	0.7	0.5	0.5
		1	0	0.166667	0.833333	0.5	0.5
				0.142857	0.857143	0.642857	0.357143
				0.285714	0.714286	0.2	0.8
				0.190476	0.809524	0.4	0.6
				0.163265	0.836735	0.5	0.5
				0.25	0.75	0.333333	0.666667
				0.2	0.8	0.235294	0.764706
				0.166667	0.833333	0.75	0.25
				0.125	0.875	0.444444	0.555556
				0.428571	0.571429	0.666667	0.333333
				0.777778	0.222222	0.4	0.6
				0.176471	0.823529	0.5	0.5
				0.391304	0.608696	0.4	0.6
				0.238095	0.761905	0.666667	0.333333
				0.4375	0.5625	0.5	0.5
				0.320755	0.679245	0.645833	0.354167
				0.1875	0.8125	0.7	0.3
				0.275	0.725	0.72	0.28
				0.323529	0.676471	0.642857	0.357143
				0.152542	0.847458	0.555556	0.444444
				0.28	0.72	0.571429	0.428571
				0	1	0.857143	0.142857
				0.272727	0.727273	0.357143	0.642857
				0.307692	0.692308	0.452381	0.547619
				0.291667	0.708333	0.382979	0.617021
				0.25	0.75	0.470588	0.529412
				0.5	0.5	0.344828	0.655172
						0.52	0.48
						0.214286	0.785714

## Sheet: Extended Data Figure 8c
Khc940-bound dynein velocity - Tm1 (µm/sec)	Khc940-bound dynein velocity + Tm1 (µm/sec)	Per experiment median Khc940-bound dynein velocity - Tm1 (µm/sec)	Per experiment median Khc940-bound dynein velocity + Tm1 (µm/sec)
0.058212	0.0653184	0.079527	0.0925344
0.044982	0.3024	0.0702261	0.0719523
0.054537	0.255226	0.0646254	0.0571053
0.195657	0.0397656
0.101577	0.248724
0.01764	0.0399168
0.031164	0.0244944
0.254751	0.0872424
0.190218	0.3024
0.392049	0.183103
0.147	0.260366
0.046011	0.336571
0.066444	0.0477792
0.040719	0.0285768
0.009702	0.145454
0.007938	0.147269
0.052479	0.0104328
0.029841	0.420034
0.139503	0.576223
0.040719	0.567
0.400281	0.109318
0.071148	0.237535
0.008379	0.0898128
0.026607	0.0845208
0.407043	0.0179928
0.295617	0.06426
0.555366	0.0161784
0.034104	0.0390096
0.04998	0.127915
0.28665	0.11597
0.3675	0.295898
0.052626	0.271404
0.050715	0.0607824
0.03234	0.0550368
0.018963	0.0898128
0.034545	0.0269136
0.079527	0.0255528
0.359856	0.509242
0.10601	0.0492912
0.103475	0.116273
0.0478611	1.00336
0.191444	0.0668304
0.0500976	0.549763
0.111229	0.259157
0.235429	0.309658
0.0972132	0.0916272
0.0369768	0.0424872
0.0505449	0.130032
0.418225	0.0182952
0.0916965	0.10085
0.32802	0.0532224
0.421058	0.1512
0.0378714	0.644112
0.870148	0.0518616
0.0796194	0.546588
0.0618765	0.337327
0.0475629	0.197165
0.0738045	0.0926856
0.0369768	0.027972
0.517675	0.0232848
0.536164	0.369533
0.2982	0.0577584
0.480997	0.027216
0.0222159	0.0523152
0.0174447	0.0178416
0.0138663	0.137138
0.0272853	0.0988848
0.0319074	0.129276
0.0111825	0.274882
0.0250488	0.04158
0.0359331	0.015876
0.43895	0.756
0.0378714	0.049896
0.282544	0.130334
0.0906528	0.0185976
0.276282	0.691135
0.630842	0.19656
0.174	0.047628
0.0317583	0.0505008
0.0742518	0.1323
0.0216195	0.0266112
0.0605346	0.0911736
0.135383	0.101606
0.0246015	0.17645
0.0471156	0.029484
0.111825	0.0319032
0.13911	0.0273672
0.146864	0.012852
0.117491	0.341561
0.10109	0.0694008
0.43075	0.0943488
0.7455	0.314042
0.136128	0.11461
0.0143136	0.126857
0.288956	0.0866376
0.4473	0.049896
0.439398	0.52164
0.0535269	0.116878
0.0642621	0.0201096
0.0486066	0.0167832
0.0556143	0.4536
0.067095	0.307843
0.0302673	0.0222264
0.0472647	0.163296
0.0265398	0.42336
0.340693	0.102665
0.610564	0.0648648
0.236025	0.0267624
0.338606	0.029484
0.0344421	0.0163296
0.0217686	0.42336
0.312663	0.0734832
0.0721644	0.0184464
0.19383	0.0595728
0.18891	0.0284256
0.264354	0.0172368
0.115553	0.0190512
0.0263907	0.0698544
0.0229614	0.0669816
0.0423444	0.324022
0.114658	0.144094
0.146267	0.0459648
0.159388	0.116575
0.0612801	0.344282
0.36947	0.112039
0.062622	0.517255
0.132401	0.114761
0.245866	0.113854
0.15909	0.04536
0.165948	0.1134
0.0496503	0.0996408
0.101239	0.501379
0.0539742	0.333396
0.0666477	0.0281232
0.126437	0.507578
0.170719	0.0615384
0.11928	0.0585144
0.176236	0.042336
0.0493007	0.324778
0.106892	0.0444528
0.0685472	0.076356
0.074025	0.0571536
0.0479682	0.351238
0.631729	0.0533736
0.0196907	0.274882
0.114591	0.10085
0.0401215	0.172368
0.0704718	0.082404
0.164484	0.187942
0.0457475	0.0674352
0.200904	0.0244944
0.0852012	0.057456
0.0982422	0.135929
0.36225	0.154829
0.0523089	0.0624456
0.0383985	0.02268
0.115051	0.0452088
0.0411516	0.046872
0.0194166	0.0765072
0.0194166	0.127008
0.0156492	0.437422
0.05796	0.296352
0.13041	0.6048
0.0917217	0.0489888
0.0518742	0.102665
0.0876645	0.368172
0.0908523	0.0923832
0.350223	0.0866376
0.154029	0.3402
0.21735	0.0616896
0.0895482	0.0727272
0.116355	0.169042
0.583222	0.0639576
0.0415863	0.0406728
0.0907074	0.1323
0.0147798	0.18643
0.10143	0.29227
0.0460782	0.184313
0.0266616	0.159818
0.0269514	0.0163296
0.125483	0.0571536
0.136786	0.0111888
0.0213003	0.0444528
0.0543375	0.027972
0.120702	0.103118
0.0500976	0.04158
0.013419	0.158004
0.219028	0.195199
0.0802158	0.0170856
0.0257943	0.116122
0.0943803	0.111586
0.0228123	0.14364
0.540488	0.0275184
0.182946	0.0585144
0.0128226	0.10962
0.047712	0.139104
0.0375732	0.0284256
0.0162519	0.0058968
0.022365	0.384804
0.0108843	0.268834
0.0441336	0.0560952
0.5715	0.283954
0.154617	0.156946
0.0146118	0.0117936
0.0248997	0.013608
0.0808122	0.0343224
0.0769356	0.244188
0.0344421	0.005292
0.309979	0.40824
0.056658	0.164959
0.468621	0.0344736
0.44402	0.519826
0.124946	0.358042
0.017892	0.0414288
0.0702261	0.016632
0.5964	0.115366
0.0751464	0.422453
0.0331002	0.0563976
0.0587454	0.3024
0.0383187	0.364694
0.0514395	0.0130032
0.005964	0.0214704
0.0211722	0.0520128
0.457588	0.0273672
0.377074	0.112946
0.0453264	0.0553392
0.316837	0.224532
0.133444	0.0654696
0.0320565	0.0149688
0.154766	0.112342
0.488004	0.06048
0.0150591	0.082404
0.0436863	0.0331128
0.0413007	0.217123
0.541531	0.166925
0.0459228	0.0371952
0.040257	0.138499
0.421357	0.0792288
0.142092	0.104933
0.131208	0.021924
0.6213	0.0432432
0.5633	0.0503496
0.26838	0.0704592
0.575079	0.122623
0.0688842	0.0104328
0.263161	0.3024
0.0736554	0.0222222
0.0500976	0.0217717
0.0860307	0.0818317
0.204416	0.0285285
0.0201285	0.106757
0.0132699	0.177928
0.0384678	0.114865
0.0706734	0.495195
0.0617274	0.0548047
0.0514395	0.0193694
0.0575526	0.0611111
0.0331002	0.525525
0.0712698	0.0666666
0.0436863	0.206757
0.0752955	0.0654654
0.017892	0.247297
0.0147609	0.0537537
0.0602364	0.0614114
0.0325038	0.253153
0.0426426	0.0375375
0.0606837	0.36036
0.0335475	0.709008
0.0496503	0.11021
0.0963186	0.135585
0.0267267	0.181832
0.251802	0.39039
0.133784	0.167567
0.0223723	0.143994
0.0378378	0.0372372
0.218468	0.471921
0.709759	0.0282282
0.0273273	0.193994
0.145345	0.784083
0.0894894	0.172072
0.254054	0.0234234
0.10991	0.181231
0.0552552	0.0352852
0.009009	0.0666666
0.0139639	0.525525
0.476876	0.15015
0.084084	0.136787
0.0915915	0.0657657
0.116667	0.0357357
0.0181682	0.0719218
0.0915915	0.0873873
0.239489	0.155255
0.0285285	0.0729729
0.382132	0.103904
0.0229729	0.3503
0.246696	0.0277778
0.00855855	0.189639
0.104504	0.0527026
0.166817	0.0785284
0.0313814	0.0632131
0.145195	0.0710209
0.0162162	0.489939
0.2898	0.0448949
0.662338	0.104504
0.161998	0.0677177
0.55062	0.0915915
0.0447741	0.0291291
0.0205758	0.261862
0.0646254	0.852176
0.0211554	0.0885339
0.493385	0.162263
0.02898	0.0481162
0.103893	0.0676589
0.307912	0.0137687
0.0665091	0.0185062
0.0515844	0.266194
0.0498456	0.102747
0.0407169	0.0216153
0.0525987	0.282627
0.0310086	0.191873
0.445857	0.0467838
0.219379	0.044563
0.0676683	0.194834
0.0814338	0.170998
0.0760725	0.0241322
0.0759276	0.0153972
0.131714	0.292251
0.0962136	0.0302022
0.708851	0.481162
0.0647703	0.0196907
0.0452088	0.0265009
0.036225	0.0350878
0.102299	0.0513733
0.745221	0.170109
0.0266616	0.782592
0.103459	0.8883
0.180256	0.14805
0.112587	0.0387891
0.0962136	0.0339035
0.130845	0.245467
0.0404271	0.56259
0.0644805	0.34999
0.0447741	0.0538902
0.0465129	0.0250204
0.184458	0.133837
0.0366597	0.15338
0.0156492	0.168481
0.0944748	0.0555187
0.0146349	0.110149
0.510048	0.0849807
0.0568008	0.0293139
0.20286	0.032571
0.0305739	0.121105
0.0063756	0.0713601
0.0320229	0.0373086
0.026082	0.0436747
0.113457	0.191281
0.0892584	0.0550746
0.393259	0.0895703
0.100126	0.222963
0.0302841	0.0642537
0.0207207	0.173959
0.0611478	0.0618849
0.059409	0.085721
0.0223146	0.134281
0.0344862	0.869794
0.1449	0.392332
0.0427455	0.0855729
0.102299	0.1177
0.281251	0.0618849
0.4347	0.102451
0.101575	0.197351
0.156057	0.106004
0.0357903	0.0287217
0.0099981	0.271376
0.34776	0.120217
0.0163737	0.0435267
0.0410067	0.0787626
0.374277	0.781408
0.0359352	0.462064
0.0204309	0.523801
0.907509	0.148938
0.139973	0.199571
0.0779562	0.196018
0.352832	0.0219114
0.0746235	0.558
0.0599886	0.268859
0.0340515	0.0381969
0.0659295	0.0790587
0.0175329	0.119328
0.0612927	0.104671
0.320374	0.145533
0.627852	0.0140648
0.769709	0.461324
0.0255024	0.212896
0.0108675	0.288697
0.0292698	0.138871
0.0885339	0.100378
0.244301	1.09557
0.352472	0.0432306
0.0407043	0.0124362
0.0325038	0.0855729
0.0366786	0.094752
0.1242	0.0398254
0.0082005	0.03568
0.0612801	0.144053
0.0390642	0.169517
0.067095	0.0450072
0.18891	0.0331632
0.0110334	0.0590719
0.0368277	0.484568
0.0113316	0.152492
0.0266889	0.03568
0.0099897	0.15945
0.680194	0.0340515
0.0083496	0.279666
0.107352	0.209787
0.242287	0.251685
0.242884	0.0525578
0.0636657	0.0339035
0.0840924	0.2619
0.0290745	0.11992
0.114211	0.0602564
0.0618765	0.0944559
0.0378714	0.413504
0.146118	0.0424904
0.0415989	0.435859
0.0211722	0.0812795
0.0231105	0.0493007
0.400781	0.0281295
0.10437	0.0604044
0.164159	0.0556668
0.0137172	0.240877
0.0584472	0.0405657
0.139408	0.257163
0.101984	0.25435
0.0925911	0.277594
0.0141645	0.855433
0.0092442	0.212896
0.215897	0.108817
0.275835	0.0509292
0.143136	0.0509292
0.019383	0.0513733
0.0582981	0.11163
0.0438354	0.390556
0.0289254	0.0608486
0.165948	0.0587758
0.043239	0.026649
0.0280308	0.14805
0.0204267	0.0168777
0.0262416	0.0469318
0.0599382	0.0256127
0.017892	0.0395293
0.126735	0.0777262
0.702857	0.485917
0.0323547	0.446107
0.0392133	0.0994497
0.470261	0.0788739
0.857325	0.799772
0.13419	0.0231105
0.0260925	0.0794703
0.0633675	0.0301182
0.31475	0.102879
0.37275	0.43075
0.3644	0.19219
0.126735	0.460868
0.11272	0.04473
0.0514395	0.156108
0.0481593	0.095424
	0.0090951
	0.170869
	0.246313
	0.0159537
	0.201136
	0.055167
	0.0585963
	0.623089
	0.202627
	0.0614292
	0.0243033
	0.0274344
	0.140601
	0.361418
	0.0958713
	0.0383187
	0.0612801
	0.0460719
	0.0280308
	0.156257
	0.0158046
	0.156555
	0.0366786
	0.028329
	0.0187866
	0.225737
	0.260925
	0.0657531
	0.0050694
	0.0812595
	0.0429408
	0.0260925
	0.47712
	0.108992
	0.0843906
	0.0647094
	0.0381696
	0.034293
	0.398992
	0.0347403
	0.0614292
	0.0190848
	0.344123
	0.0410025
	0.0248997
	0.175342
	0.11928
	0.313856
	0.263161
	0.0921438
	0.533629
	0.0823032
	0.184139
	0.0517377
	0.355305
	0.0366786
	0.273151
	0.2982
	0.0554652
	0.24855
	0.121069
	0.535865
	0.0207249
	0.0426426
	0.0548688
	0.0143136
	0.0645603
	0.377372
	0.0421953
	0.305357
	0.0187866
	0.148056
	0.0653058
	0.0201285
	0.0709716
	0.1242
	0.0653058
	0.0578508
	0.49203
	0.0635166
	0.123604
	0.0684369
	0.0876708
	0.180858
	0.0332493
	0.0460719
	0.035784
	0.13419
	0.360375
	0.123008
	0.0605346
	0.172061
	0.114509
	0.287614
	0.0246015
	0.0341439
	0.243928
	0.0679896
	0.0456246
	0.0542724
	0.404657
	0.011928
	0.0122262
	0.0599382
	0.126735
	0.0766374
	0.168483
	0.17892
	0.038766
	0.0138663
	0.0518868
	0.0256452
	0.102006
	0.103191
	0.316235
	0.0376047
	0.0648459
	0.278482
	0.0108077
	0.0601083
	0.0053298
	0.0968247
	0.123326
	0.245023
	0.167741
	0.0823158
	0.0423423
	0.108373
	0.0371606
	0.0322749
	0.124362
	0.187875
	0.0524097
	0.0869054
	0.0784665
	0.029462
	0.0328671
	0.289438
	0.0256127
	0.026649
	0.0151011
	0.196166
	0.0313866
	0.0487085
	0.0429345
	0.0892741
	0.0094752
	0.0216153
	0.139611
	0.0744691
	0.0186543
	0.113258
	0.482347
	0.74025
	0.194982
	0.0068103
	0.366868
	0.0256127
	0.0672147
	0.0694354
	0.235103
	0.255682
	0.0629212
	0.145829
	0.338442
	0.526466
	0.068251
	0.0666225
	0.310905
	0.0041454
	0.020875
	0.0695835
	0.164484
	0.0217634
	0.111037
	0.0657342
	0.302762
	0.183582
	0.0932715
	0.65675
	0.0381969
	0.108373
	0.0282775
	0.0347918
	0.0949
	0.0883859
	0.18225
	0.0106596
	0.0481162
	0.0370125
	0.0845366
	0.0145089
	0.044563
	0.0922352
	0.392629
	0.0202829
	0.459399
	0.0251685
	0.490342
	0.762161
	0.145977
	0.0540383
	0.0552226
	0.0820197
	0.0211711
	0.0262048
	0.0846846
	0.0900144
	0.067955
	0.286921
	0.0498929
	0.0644017
	0.0426384
	0.629212
	0.0269451
	0.0389371
	0.0527058
	0.0248724
	0.005922
	0.0416021
	0.0220595
	0.0842404
	0.0331632
	0.0361242
	0.0226516
	0.0719523
	0.00399735
	0.0435267
	0.122141
	0.0282775
	0.204457
	0.713305
	0.278186
	0.0530019
	0.370125
	0.085721
	0.0543343
	0.0140648
	0.0686952
	0.471095
	0.163743
	0.0877937
	0.0645498
	0.0265009
	0.0293139
	0.00518175
	0.0331632
	0.0880897
	0.0251685
	0.116071
	0.0293139
	0.167741
	0.0232438
	0.0820197
	0.169221
	0.0399735
	0.0806873
	0.0458955
	0.0516694
	0.0205789
	0.435415
	0.014657
	0.0438228
	0.48516
	0.044415
	0.128063
	0.288253
	0.05922
	0.495375
	0.0275373
	0.0346437
	0.202088
	0.020875
	0.0722484
	0.5922
	0.0127323
	0.00577395
	0.0863132
	0.0349398
	0.074025
	0.226961
	0.0447111
	0.684731
	0.074025
	0.74025
	0.0666225
	0.104819
	0.190985
	0.0349398
	0.157969
	0.105708
	0.962325
	0.0358281
	0.0627732
	0.0442669
	0.053298
	0.0837963
	0.632618
	0.14805
	0.11844
	0.125694
	0.0466357
	0.0876456
	0.0321268
	0.0555187
	1.07677
	0.703237
	0.118884
	0.191725
	0.0849807
	0.0645498
	0.133689
	0.0142128
	0.0364203
	0.41454
	0.0800951
	0.100526
	0.0719523
	0.0565551
	0.0644017
	0.115923
	0.115923
	0.159006
	0.226368
	0.0426384
	0.26649
	0.0313866
	0.481162
	0.42135
	0.0091791
	0.789551
	0.0987493
	0.0869054
	0.0638096
	0.138514
	0.041748
	0.102581
	0.734317
	0.02982
	0.011928
	0.0599382
	0.111676
	0.162221
	0.0444318
	0.165054
	0.049203
	0.123902
	0.205012
	0.518272
	0.5964
	0.335475
	0.0158046
	0.0333984
	0.34293
	0.0585963
	0.0888636
	0.146714
	0.0696297
	0.0199794
	0.0220668
	0.0375732
	0.13583
	0.0325038
	0.0399588
	0.7206
	0.0105861
	0.0486066
	0.0105861
	0.0483084
	0.106905
	0.0302673
	0.160879
	0.0202776
	0.037275
	0.10437
	0.0533778
	0.0186375
	0.0861798
	0.011928
	0.292087
	0.0548688
	0.0960204
	0.122411
	0.0271362
	0.0272853
	0.193532
	0.0172956
	0.0293727
	0.40749
	0.0243033
	0.0527814
	0.122858
	0.395413
	0.0642621
	0.0539742
	0.293578
	0.2352
	0.006615
	0.093198
	0.028224
	0.043953
	0.342951
	0.047187
	0.115101
	0.147
	0.029841
	0.019845
	0.522732
	0.22197
	0.5145
	0.4557
	0.171549
	0.053508
	0.040131
	0.047628
	0.134799
	0.307671
	0.053067
	0.103929
	0.154203
	0.078792
	0.027342
	0.018081
	0.017787
	0.042336
	0.1176
	0.042336
	0.03087
	0.102606
	0.337218
	0.052773
	0.016464
	0.021903
	0.109956
	0.026166
	0.086877
	0.16905
	0.0294
	0.4116
	0.022344
	0.163905
	0.012789
	0.206535
	0.078351
	0.047334
	0.032634
	0.116865
	0.014259
	0.103341
	0.056595
	0.233142
	0.218589
	0.3381
	0.251076
	0.350007
	0.11466
	0.086142
	0.036309
	0.077322
	0.025431
	0.03822
	0.050568
	0.015729
	0.041454
	0.588
	0.5145
	0.151116
	0.009996
	0.02499
	0.064386
	0.158907
	0.028665
	0.280623
	0.03381
	0.015876
	0.147
	0.034104
	0.136269
	0.002058
	0.100254
	0.318549
	0.128331
	0.158907
	0.018375
	0.092169
	0.019551
	0.026019
	0.098049
	0.153615
	0.6468
	0.334866
	0.021609
	0.074088
	0.105987
	0.039396
	0.053214
	0.079086
	0.011907
	0.021462
	0.027783
	0.042483
	0.178473
	0.0578508
	0.0496503
	0.0714189
	0.0994497
	0.128524
	0.0994497
	0.156257
	0.0463701
	0.0487557
	0.0381696
	0.107501
	0.127928
	0.0307146
	0.0781284
	0.0308637
	0.0073059
	0.118535
	0.0329511
	0.0945294
	0.0272853
	0.0444318
	0.083496
	0.376627
	0.0090951
	0.118535
	0.0378714
	0.0290745
	0.0690333
	0.111825
	0.0454755
	0.005964
	0.553757
	0.026838
	0.0994497
	0.104221
	0.1491
	0.227974
	0.0257943
	0.0183393
	0.0092442
	0.205012
	0.285825
	0.0198303
	0.0316092
	0.0624729
	0.0733572
	0.0331002
	0.0615783
	0.022365
	0.0314601
	0.031311
	0.34785
	0.0259434
	0.0837942
	0.023856
	0.176236
	0.017892
	0.0384678
	0.0331002
	0.0424935
	0.0405552
	0.0144627
	0.0272853
	0.25347
	0.0709716
	0.0606837
	0.110036
	0.0192339
	0.120473
	0.04473
	0.0344421
	0.0262416
	0.0386169
	0.090951
	0.087969
	0.0582981
	0.0662004
	0.032802
	0.0587454
	0.0333984
	0.0263907
	0.0392133
	0.196961
	0.0560616
	0.0392133
	0.140154
	0.0453264
	0.0125244
	0.077532
	0.0545706
	0.573439
	0.0065604
	0.0219177
	0.0299691
	0.0571053
	0.0599382
	0.0496503
	0.0632184
	0.0837942
	0.0727608
	0.020874
	0.205012
	0.0919947
	0.0314601
	0.010437

## Sheet: Extended Data Figure 8d
Distance travelled by Khc940 toward minus end + DDBEosk - Tm1 (µm)	Distance travelled by Khc940 toward minus end + DDBEosk + Tm1 (µm)		Bin Center (µm)	1 - cumulative frequency distance travelled by Khc940 toward minus end + DDBEosk - Tm1 (µm)	1 - cumulative frequency distance travelled by Khc940 toward minus end + DDBEosk + Tm1 (µm)
12.3375	0.9975		0	0.848614	0.914498
0.7875	1.575		2	0.392324	0.398699
5.4075	1.4175		4	0.228145	0.209108
8.6625	2.415		6	0.138593	0.111524
2.4675	2.6775		8	0.0831556	0.0585502
2.205	4.305		10	0.0575693	0.0371747
1.68	2.1		12	0.0447761	0.0250929
1.365	5.9325		14	0.0362473	0.0167286
1.155	1.68		16	0.0191898	0.0111524
1.68	1.2075		18	0.00852878	0.00650558
4.5675	1.6275		20	0.00426439	0.0027881
2.94	3.6225		22	0.0021322	0.0027881
0.9975	2.8875		24	0	0.00185874
4.0425	4.0425		26	0	0.00092937
0.6825	2.625		28	0	0.00092937
0.6825	1.995		30	0	0
0.7875	0.735
1.5225	1.3125
2.94	7.4025
2.5725	0.7875
6.72	4.935
1.575	0.5775
2.2575	4.9875
2.6775	0.9975
1.89	2.4675
19.005	2.3625
3.57	4.305
0.6825	5.7225
0.8925	2.31
2.0475	1.2075
1.05	2.3625
1.5225	4.1475
1.05	3.465
3.78	6.3525
0.945	2.1525
2.4675	8.7675
2.1	3.675
8.61	3.36
1.4175	7.4025
1.785	1.575
0.945	3.8325
6.8775	1.995
2.625	2.1
2.625	1.26
1.575	2.2575
1.575	5.0925
5.88	2.0475
2.205	2.5725
6.0375	3.3075
0.84	1.05
1.155	2.3625
2.52	0.84
0.84	11.1825
16.8525	7.14
3.7275	2.4675
9.6075	1.5225
8.7675	1.575
15.0675	1.995
5.6175	0.63
6.5625	2.6775
10.7625	2.31
1.05	0.6825
8.9775	2.1525
1.26	3.4125
4.1475	1.7325
1.05	3.57
0.8925	2.6775
3.8325	6.195
1.785	1.05
5.25	4.41
4.9875	1.3125
2.7825	3.9375
0.8925	3.36
1.89	1.3125
1.6275	4.725
3.3075	1.68
2.8875	0.6825
0.735	2.0475
0.84	6.72
11.3925	1.1025
1.68	0.63
1.365	7.8225
4.1475	2.3625
3.78	1.1025
0.63	2.1525
0.63	1.2075
1.47	3.465
3.5175	1.68
7.035	6.405
4.095	2.0475
1.365	2.7825
1.3125	1.4175
1.1025	1.3125
3.3075	2.4675
1.6275	6.195
0.945	1.68
2.94	7.245
15.6975	3.045
1.155	1.05
6.2475	2.415
1.155	5.1975
2.3625	2.9925
2.9925	1.155
1.05	4.935
2.94	1.47
16.4325	3.78
24.9375	2.205
0.9975	1.365
7.035	1.3125
1.26	2.205
0.63	2.205
3.4125	6.2475
7.7175	4.83
2.0475	5.1975
1.995	1.89
4.095	1.7325
7.4025	1.89
3.78	2.2575
0.84	2.2575
2.625	4.725
0.525	4.305
5.46	3.8325
8.1375	6.3525
2.0475	7.77
2.9925	1.05
1.1025	6.825
8.7675	1.155
3.2025	3.36
5.8275	0.63
3.6225	2.0475
0.5775	1.4175
0.9975	6.615
1.3125	4.515
3.3075	1.365
4.41	2.4675
7.875	7.56
1.05	14.28
2.73	3.78
1.785	6.8775
1.365	6.3
2.31	2.415
0.63	8.7675
3.045	7.56
3.36	3.8325
6.615	2.1
2.1525	8.925
3.78	17.0625
2.0475	1.26
3.675	6.72
4.305	5.67
1.995	1.995
9.5025	3.4125
2.1	3.255
1.05	2.2575
1.575	2.73
1.155	3.7275
19.2675	2.73
10.5	2.1
3.2025	6.7725
3.6225	4.41
1.8375	8.505
0.84	2.5725
0.945	1.47
0.9975	4.095
2.0475	0.9975
1.2075	5.88
6.615	7.0875
1.5225	2.2575
3.5175	2.835
4.41	1.6275
4.935	2.625
2.7825	7.455
17.115	1.7325
2.835	5.88
5.985	2.5725
1.1025	1.9425
1.47	1.5225
1.47	2.0475
6.825	2.94
2.1525	0.84
5.0925	0.735
4.4625	1.3125
2.8875	3.8325
1.575	1.5225
2.3625	0.7875
5.145	0.9975
3.6225	1.2075
10.0275	5.8275
0.735	0.8925
1.68	3.99
5.88	3.0975
1.365	1.995
1.5225	1.575
18.165	2.52
1.6275	1.5225
2.1525	1.2075
7.14	3.2025
2.8875	1.8375
5.3025	1.47
1.4175	1.68
4.62	5.67
2.415	4.83
1.47	1.4175
0.84	1.785
1.89	1.1025
0.6825	2.9925
3.36	1.1025
3.465	0.63
18.0075	1.4175
5.46	1.26
2.31	4.9875
7.035	2.8875
1.6275	2.3625
1.8375	4.305
3.4125	1.8375
3.15	9.66
3.2025	4.9875
4.2	4.935
4.515	5.985
5.5125	4.305
2.625	4.3575
0.6825	1.9425
1.155	2.2575
4.6725	6.2475
2.2575	3.885
0.8925	5.0925
0.8925	2.5725
0.8925	7.455
2.1525	3.15
5.7225	11.7075
1.89	3.045
5.1975	7.875
0.8925	3.0975
1.365	4.1475
3.6225	2.7825
6.3	2.52
5.985	25.2
3.4125	3.465
6.3525	2.2575
2.31	2.205
10.5	4.515
8.925	2.415
1.4175	2.835
1.4175	2.2575
14.5425	2.31
1.575	1.68
2.2575	1.68
7.77	5.6175
13.125	1.26
4.4625	1.6275
3.4125	2.835
2.73	1.68
1.2075	7.35
0.945	8.1375
0.63	1.4175
0.525	1.575
0.8925	10.5525
0.735	1.47
2.835	3.57
1.89	4.41
2.415	0.8925
2.0475	1.47
2.205	1.995
2.205	8.925
5.565	3.0975
1.05	1.785
1.7325	1.89
0.84	4.4625
1.1025	3.045
2.6775	1.47
7.35	2.415
5.7225	1.365
11.13	5.04
1.575	2.4675
8.295	2.1525
1.68	2.31
2.73	5.04
3.0975	1.6275
4.83	2.4675
14.5425	2.8875
1.155	0.9975
1.575	1.8375
2.7825	0.9975
1.4175	1.89
4.7775	5.5125
2.835	2.5725
1.47	2.6775
1.89	1.47
3.8325	1.3125
5.355	1.785
7.14	3.36
3.5175	4.7775
1.6275	2.6775
1.47	1.89
0.8925	3.3075
1.2075	4.7775
1.47	3.78
2.0475	4.62
3.15	2.9925
0.9975	3.0975
4.62	1.365
3.255	3.255
1.785	1.5225
1.68	6.9825
0.9975	6.4575
0.9975	8.0325
1.995	3.0975
5.1975	3.57
6.51	12.39
1.89	2.8875
6.615	9.555
5.9325	2.1525
8.4	3.045
1.785	2.2575
0.8925	2.2575
12.075	30.765
2.3625	1.785
2.4675	2.8875
2.9925	2.205
1.89	3.675
2.1	9.7125
2.94	2.1525
7.0875	2.625
0.945	4.305
1.6275	2.94
1.7325	1.785
3.675	4.0425
10.71	2.7825
16.695	1.365
0.8925	6.825
1.05	3.2025
0.945	6.72
1.89	9.135
1.89	6.8775
4.83	1.9425
1.05	2.205
2.94	4.0425
12.285	3.57
9.45	1.155
2.94	6.615
2.7825	1.995
2.9925	1.365
12.9675	2.4675
6.7725	4.62
1.47	6.4575
3.99	1.5225
4.5675	3.465
1.575	0.63
2.1525	5.04
4.62	7.14
1.5225	2.52
1.1025	2.835
2.31	1.4175
2.31	2.835
2.4675	2.8875
0.5775	1.6275
2.4675	3.255
16.17	7.5075
0.9975	4.83
16.3275	20.79
1.47	6.93
0.735	10.92
2.2575	17.22
0.84	15.0675
0.84	4.095
8.6625	4.935
0.945	2.7825
0.6825	1.365
15.855	1.8375
1.7325	2.1525
2.0475	1.89
5.04	3.99
0.735	2.7825
0.9975	1.89
0.8925	1.7325
1.26	2.0475
2.5725	8.61
1.47	6.5625
1.6275	4.9875
1.89	14.91
1.5225	9.66
6.2475	8.715
4.515	3.255
17.325	2.3625
2.94	2.8875
7.14	2.5725
0.63	4.6725
6.3525	3.6225
3.675	2.8875
0.42	4.5675
6.4575	2.7825
8.82	6.09
3.4125	2.7825
4.4625	7.035
1.3125	2.415
1.1025	2.0475
1.89	0.7875
6.09	2.1
3.0975	1.9425
5.46	0.9975
4.0425	2.0475
1.155	5.46
1.785	2.8875
1.8375	3.4125
1.47	4.41
9.9225	1.89
2.94	9.975
3.045	1.995
0.9975	7.14
0.8925	3.5175
0.9975	1.89
3.9375	1.785
8.715	0.9975
1.05	1.47
3.8325	3.675
1.4175	2.6775
0.945	1.785
0.6825	1.785
2.9925	2.31
2.625	1.155
1.155	6.0375
2.4675	1.785
1.89	1.7325
21.0525	3.885
9.5025	8.505
7.7175	3.885
9.2925	11.13
4.62	11.4975
2.1	1.3125
4.515	2.8875
6.615	14.2275
13.7025	2.94
0.525	7.0875
1.05	1.785
4.5675	1.7325
1.365	3.5175
1.89	1.575
1.365	2.73
1.9425	3.6225
2.205	1.3125
1.9425	2.31
2.52	1.155
0.735	1.8375
3.0975	4.9875
3.78	6.51
4.8825	11.445
17.5875	9.9225
1.5225	8.9775
1.1025	1.1025
2.9925	1.7325
3.15	3.0975
5.145	2.52
1.68	2.73
8.925	2.205
1.7325	4.62
1.6275	18.5325
9.24	1.365
2.1525	1.9425
2.415	6.195
1.4175	8.085
0.525	0.84
0.8925	7.14
1.995	1.05
1.3125	1.365
1.155	12.18
1.785	1.785
3.4125	4.095
3.045	5.8275
2.625	2.8875
	3.0975
	2.4675
	1.995
	1.365
	3.045
	4.0425
	17.64
	6.1425
	16.695
	11.4975
	3.6225
	5.0925
	23.3625
	20.1075
	0.945
	4.515
	4.3575
	2.4675
	1.89
	6.93
	2.1525
	3.3075
	6.615
	1.155
	1.05
	2.94
	3.675
	1.365
	0.945
	1.26
	0.8925
	2.52
	1.68
	8.1375
	3.15
	1.2075
	7.5075
	3.255
	5.1975
	2.94
	6.72
	3.255
	1.575
	0.9975
	2.73
	10.5
	1.05
	2.1
	1.575
	2.205
	3.57
	0.84
	5.25
	11.2875
	7.5075
	1.47
	10.8675
	3.99
	1.5225
	4.725
	1.365
	6.0375
	3.3075
	1.785
	1.47
	0.945
	0.6825
	4.2525
	4.095
	15.5925
	6.5625
	7.665
	2.5725
	1.1025
	4.6725
	1.05
	7.35
	2.625
	3.465
	1.05
	6.09
	2.0475
	18.9
	5.985
	3.675
	1.5225
	0.945
	1.4175
	3.045
	2.4675
	10.2375
	2.3625
	3.3075
	1.4175
	1.6275
	1.8375
	3.78
	2.9925
	0.7875
	0.84
	3.99
	1.365
	1.26
	2.1525
	1.785
	0.9975
	1.365
	0.945
	1.3125
	2.0475
	1.26
	5.985
	4.7775
	5.67
	2.4675
	3.78
	4.095
	4.1475
	1.05
	2.94
	0.9975
	8.2425
	2.1
	2.52
	2.6775
	2.8875
	2.7825
	1.575
	4.2
	0.8925
	1.1025
	1.7325
	1.2075
	6.3525
	3.2025
	3.15
	1.89
	2.2575
	1.8375
	0.945
	2.415
	5.565
	2.4675
	2.94
	2.205
	2.1525
	1.7325
	4.1475
	4.305
	4.7775
	5.4075
	1.365
	5.3025
	5.25
	5.67
	0.9975
	20.685
	2.6775
	9.24
	8.4525
	1.4175
	0.9975
	6.51
	13.44
	3.36
	1.68
	16.8
	10.29
	1.1025
	1.365
	6.51
	6.2475
	8.925
	2.4675
	1.89
	2.31
	2.3625
	1.6275
	1.5225
	9.0825
	12.1275
	11.4975
	6.4575
	1.2075
	2.1525
	2.415
	1.68
	3.0975
	2.835
	2.835
	5.5125
	2.4675
	4.305
	7.035
	6.405
	1.8375
	4.725
	1.995
	11.13
	7.2975
	3.7275
	3.78
	1.155
	2.1525
	2.1525
	5.25
	9.1875
	5.9325
	1.47
	1.6275
	2.94
	8.6625
	12.7575
	2.6775
	3.36
	6.2475
	2.52
	0.84
	0.525
	0.84
	1.4175
	1.7325
	1.8375
	1.6275
	4.095
	5.67
	1.05
	1.68
	1.7325
	2.3625
	4.5675
	8.3475
	3.255
	0.9975
	1.3125
	1.155
	2.6775
	1.68
	2.0475
	1.8375
	2.73
	0.84
	3.4125
	7.14
	2.52
	1.785
	1.785
	1.155
	1.995
	4.2
	1.155
	2.6775
	1.1025
	1.6275
	1.26
	0.525
	1.26
	1.8375
	2.3625
	1.47
	10.5
	4.5675
	1.68
	19.2675
	13.965
	13.125
	9.7125
	3.57
	4.5675
	2.52
	1.68
	3.7275
	2.1
	1.1025
	2.73
	1.155
	1.05
	0.735
	0.6825
	0.84
	1.2075
	0.84
	1.9425
	0.945
	3.675
	4.2525
	0.8925
	2.1
	1.365
	1.68
	1.05
	2.73
	4.83
	10.815
	4.095
	0.945
	1.575
	2.4675
	0.6825
	1.89
	3.255
	0.8925
	7.9275
	1.8375
	0.945
	4.2
	1.995
	5.355
	2.9925
	5.0925
	3.9375
	5.88
	0.7875
	1.8375
	5.145
	3.8325
	1.995
	5.355
	3.15
	1.05
	5.67
	0.945
	1.5225
	2.73
	1.785
	1.89
	5.145
	1.365
	1.9425
	1.3125
	1.68
	1.05
	1.4175
	1.155
	2.0475
	8.925
	2.8875
	13.7025
	9.45
	3.78
	16.6425
	8.7675
	3.255
	1.47
	1.6275
	1.68
	2.835
	1.155
	7.665
	4.41
	1.4175
	1.47
	3.6225
	1.2075
	4.3575
	1.785
	6.3525
	4.1475
	1.9425
	6.615
	4.0425
	2.1525
	1.9425
	1.7325
	1.5225
	2.9925
	0.735
	3.15
	2.4675
	1.7325
	1.575
	5.04
	0.5775
	0.9975
	1.8375
	2.2575
	3.3075
	2.52
	0.8925
	7.5075
	4.2525
	2.4675
	3.6225
	1.575
	2.31
	13.4925
	5.775
	5.6175
	2.1525
	2.7825
	2.3625
	2.205
	9.1875
	1.6275
	0.8925
	3.3075
	1.26
	1.575
	7.7175
	2.625
	1.68
	8.82
	6.72
	5.67
	4.4625
	0.84
	2.2575
	3.36
	4.0425
	1.1025
	8.1375
	3.675
	1.47
	5.6175
	3.57
	6.93
	8.2425
	1.365
	3.045
	4.515
	0.7875
	0.5775
	1.26
	1.2075
	0.7875
	3.36
	2.3625
	1.365
	4.725
	2.0475
	1.2075
	0.5775
	0.525
	4.6725
	1.47
	2.73
	2.415
	0.9975
	0.735
	1.9425
	1.5225
	1.1025
	3.0975
	1.68
	1.5225
	1.05
	1.8375
	1.155
	1.365
	0.7875
	8.2425
	3.045
	2.415
	2.1525
	2.625
	1.68
	1.785
	6.0375
	3.15
	0.945
	1.4175
	8.085
	2.31
	2.205
	1.89
	1.1025
	1.9425
	2.9925
	4.62
	0.735
	2.1
	1.575
	1.1025
	2.1525
	2.205
	1.365
	2.31
	1.995
	0.525
	0.7875
	2.0475
	2.52
	2.1
	0.5775
	1.9425
	1.05
	1.47
	1.47
	1.2075
	2.31
	2.1525
	3.4125
	3.15
	2.5725
	2.205
	4.1475
	0.735
	1.3125
	1.1025
	3.57
	1.47
	3.8325
	4.3575
	0.8925
	1.2075
	0.63
	1.3125
	0.63
	5.775
	14.6475
	6.825
	1.1025
	1.6275
	6.6675
	1.9425
	2.835
	6.195
	1.4175
	15.0675
	1.68
	1.365
	1.785
	2.835
	4.1475
	2.52
	2.8875
	1.8375
	0.84
	2.835
	0.9975
	1.575
	2.625
	1.7325
	1.365
	1.155
	1.785
	5.25
	3.255
	1.365
	2.1
	5.565
	2.205
	1.155
	2.415
	1.47
	0.5775
	4.095
	1.5225
	2.4675
	2.3625
	0.4725
	1.2075
	2.5725
	1.47
	0.9975
	1.4175
	0.63
	2.73
	2.4675
	3.465
	3.675
	6.93
	4.515
	1.68
	1.89
	1.785
	1.575
	6.4575
	3.99
	5.8275
	5.5125
	5.67
	2.0475
	1.1025
	8.6625
	3.2025
	3.0975
	4.8825
	1.47
	1.9425
	2.0475
	2.8875
	1.5225
	1.1025
	3.885
	2.31
	1.3125
	2.4675
	0.8925
	1.4175
	0.6825
	2.52
	2.625
	1.575
	3.5175
	2.31
	9.9225
	5.565
	10.6575
	4.095
	7.0875
	5.25
	2.7825
	1.155
	1.9425
	3.36
	1.6275
