# Supplementary material for: Tropomyosin 1-I/C coordinates kinesin-1 and dynein motors during oskar mRNA transport
Source: Nat Struct Mol Biol. 2024 Jan 31;31(3):476–88. doi: 10.1038/s41594-024-01212-x (PMC10948360; doi:10.1038/s41594-024-01212-x)
Supplement: Supplementary file 14 — Numerical source data file with lists of motor protein movements used for statistical analysis. [file 41594_2024_1212_MOESM14_ESM.xlsx]

## Sheet: Extended Data Figure 10b
Fraction of motile dyneins colocalized with Khc FL - RNaseA	Fraction of motile dyneins colocalized with Khc FL + RNaseA		Per experiment average fraction of motile dyneins colocalized with Khc FL - RNaseA	Per experiment average fraction of motile dyneins colocalized with Khc FL + RNaseA
0.323944	0.02		0.253191	0.0187867
0.298507	0.0333333		0.315004	0.0549921
0.283333	0
0.239437	0.0296296
0.216667	0.0485437
0.203704	0
0.229167	0
0.230769	0.0337079
0.282051	0.0377358
0.362319	0.0508475
0.358974	0.1125
0.519231	0.0412371
0.367347	0.0666667
0.258065	0.0434783
0.213483	0.0537634
0.211268
0.262295
